# Supplementary material for: Novel chiral derivatizing isothiocyanate-based agent for the enantiomeric excess determination of amines
Source: Royal Society of Chemistry journal article supplement (doi:10.1039/b901568j), 2009-01-01

## Novel Chiral Derivatizing Isothiocyanate-Based Agent for the Enantiomeric Excess Determination of Amines

Cyrille Sabot, Michel Mosser, Cyrille Antheaume, Charles Mioskowski, Rachid Baati,\* and  
Alain Wagner\*

*Laboratoire des Systèmes Chimiques Fonctionnels, UMR 7199, Faculté de Pharmacie,  
Université de Strasbourg, 74 Route du Rhin, 67401 Illkirch, France*

### Electronic Supplementary Information

#### Table of contents:

|                                                                                                                                   |    |
|-----------------------------------------------------------------------------------------------------------------------------------|----|
| I. General information                                                                                                            | 2  |
| II. Synthesis of<br>1,1,1-trifluoro-N-((1S,2S)-2-isothiocyanatocyclohexyl)methanesulfonamide <b>2</b>                             | 2  |
| III. Characterization data of <b>2</b> and for all diastereoisomeric thioureas mixture                                            | 4  |
| IV. Characterization data of each diastereoisomer for selected thioureas                                                          | 9  |
| V. <sup>1</sup> H, <sup>13</sup> C and <sup>19</sup> F NMR spectra of <b>2</b> and of diastereoisomeric mixture for all thioureas | 13 |
| VI. <sup>1</sup> H, <sup>13</sup> C and <sup>19</sup> F NMR spectra of each diastereoisomer for selected thioureas                | 37 |
| VII. Plot of the initial S/R ratio of <b>3a</b> vs. the experimental ratio of thiourea diastereoisomers <b>4a</b>                 | 53 |
| VIII. Representative hOe effect for compound <b>4i</b>                                                                            | 54 |

## I. General information

All reactions were performed under an Argon atmosphere. The following solvent was distilled from the indicated drying agent: CH<sub>2</sub>Cl<sub>2</sub> (CaH<sub>2</sub>). CDCl<sub>3</sub> was used as purchased from Aldrich. All commercially available reagents were used without further purification. Analytical thin-layer chromatography (TLC) was performed on glass-backed silica gel plates. Visualization of the developed chromatogram was performed using UV absorbance and a vanillin solution. Flash column chromatography was performed with silica gel (40-63 μm) according to a standard technique. Nuclear magnetic resonance spectra (<sup>1</sup>H, <sup>13</sup>C and <sup>19</sup>F) were recorded on a 400 MHz spectrometer equipped with a BBI or a DUAL probe. Chemical shifts for <sup>1</sup>H and <sup>13</sup>C spectra are recorded in parts per million using the residual chloroform as internal standard (<sup>1</sup>H, δ = 7.26 ppm; <sup>13</sup>C, δ = 77.16 ppm). Multiplicities are indicated by s (singlet), bs (broad singlet), d (doublet), t (triplet), q (quadruplet), qt (quintuplet) and m (multiplet). Coupling constants, *J*, are reported in Hertz. Infrared spectra were recorded on a FT-IR spectrometer equipped with KRS-5 (ThI/ThBr) lenses and are reported in reciprocal centimetres (cm<sup>-1</sup>). The melting point was measured with an SMP3 Melting Point Apparatus Stuart Scientific (Bibby).

## II. General procedure for the preparation of 1,1,1-trifluoro-N-((1S,2S)-2-isothiocyanatocyclohexyl)methanesulfonamide 2

### 1. Synthesis of (4S,5S)-4,5-tetramethylenimidazolidine-2-thione<sup>a</sup>

1.13g of (1S, 2S)-cyclohexyldiamine (9.91 mmol) are first dissolved in 4 mL of a 1/1 mixture of water/ethanol. The carbon disulfide is then added slowly drop wise to the homogeneous solution. The reaction mixture is then heated at 80°C for 1h and 100 μL of 5N aqueous HCl is then added, and the resulting mixture is heated at reflux for overnight. The reaction mixture is then cooled to room temperature, the solid is filtrated, washed with cold ethanol, and dried under vacuum to afford 1.02g of a white solid (68%).

<sup>a</sup> See also : a) S. G. Davis, A. A. Mortlock, *Tetrahedron* **1993**, *49*, 4419.; b) O. P. Kleidernigg, K. Posch, W. Lindner, *J. Chromatogr. A* **1996**, *33*, 729.; and reference 14.

## **2. Synthesis of 1,1,1-trifluoro-N-((1S,2S)-2-isothiocyanatocyclohexyl) methane sulfonamide **2****

Under an Argon atmosphere 200 mg of (4S,5S)-4,5-tetramethylenimidazolidine-2-thione is dissolved in 4 mL of anhydrous DCM. The homogeneous solution is then cooled to 0°C, 535 µL of triethylamine (2 eq., 2.69 mmol) followed with 441 µL of trifluoromethanesulfonic anhydride (1 eq., 1.35 mmol), dissolved in 1 mL of dry ether, are added successively dropwise. The reaction mixture is then stirred at 0°C for 3h, and at room temperature for overnight. 4 mL of saturated aqueous solution of sodium hydrogenocarbonate are then added, and the aqueous phase extracted trice with DCM (3\*4mL). The organic phase are recovered, washed with brine, dried over Na<sub>2</sub>SO<sub>4</sub>, and concentrated under vacuum. The crude residue is then purified by flash chromatography (cyclohexane/ethyl acetate 95/5) to yield after recrystallization in hexane 275 mg of a yellow solid (75 %).

## **3. Generale procedure for the thiourea formation and *ee* determination.**

To a 9 ml CDCl<sub>3</sub> solution containing (1.05 equiv) of the chiral isothiocyanate **2** is added the racemic mixture of the amine of interest or the amine to be analyzed (1 equiv). The reaction mixture is then stirred for 2h at room temperature. After completion of the reaction, monitored by TLC analysis, the crude medium is then, without any work-up procedure, directly analyzed by <sup>19</sup>F NMR spectroscopy for the *ee* determination. The reaction can be eventually performed in cheaper CH<sub>2</sub>Cl<sub>2</sub>. In this case, after completion of the reaction, the solvent is simply evaporated and the residue dissolved in CDCl<sub>3</sub> for quick analysis by <sup>19</sup>F NMR spectroscopy. Usual flash column chromatography on silica gel afforded analytically pure inseparable mixtures of thiourea diastereoisomers.

### III. Characterization data of 2 and diastereoisomeric mixture for all thioureas

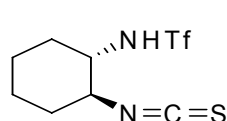

**1, 1, 1-trifluoro-N-((1S, 2S)-2-isothiocyanatocyclohexyl) methane sulfonamide 2**

TLC (SiO<sub>2</sub>), R<sub>f</sub>: 0.60 (cyclohexane/ethyl acetate : 70/30); <sup>1</sup>H NMR (400 MHz, CDCl<sub>3</sub>): 3.63-3.43 (m, 2H), 2.29-1.25 (m, 9H); <sup>13</sup>C NMR (100.62 MHz, CDCl<sub>3</sub>) : 133.77, 123.06, 116.70, 60.61-59.19, 33.33-32.78, 30.58, 27.31, 24.31-23.69; <sup>19</sup>F NMR (376.59 MHz, CDCl<sub>3</sub>): -78.142 (s, 3F); IR ν (cm<sup>-1</sup>) : 1188, 1378, 1450, 2861, 2964, 3293; MS (EI) M-1: 287; Specific rotation [α]<sub>D</sub><sup>20</sup> + 58.5 (c = 0.5, CH<sub>2</sub>Cl<sub>2</sub>); MP: 86°C.

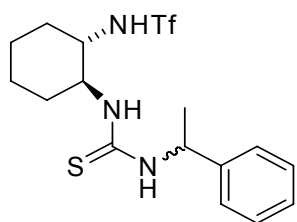

**1, 1, 1-trifluoro-N-((1S, 2S)-2-(3-(1-phenylethyl)thioureido)cyclohexyl) methane sulfonamide 4a**

1/1 mixture of diastereoisomers: colourless oil; Yield: 100%; TLC (SiO<sub>2</sub>), R<sub>f</sub>: 0.50 (cyclohexane/ethyl acetate : 70/30); <sup>1</sup>H NMR (400 MHz, CDCl<sub>3</sub>): 7.36-7.19 (m, 5H), 6.46(m, 1H), 5.45-5.26 (s, 1H), 4.35-4.21(m, 2H), 3.09-2.78 (m, 1H), 2.09-1.91 (m, 2H), 1.65-1.05(m, 10H), 0.82-0.84(m, 1H); <sup>13</sup>C NMR (100.62 MHz, CDCl<sub>3</sub>): 181.8, 179.6, 140.5, 127.1, 124.7, 120.3, 117.1, 61.0, 60.0, 57.3, 56.3, 55.5, 52.9, 33.3, 32.9, 31.5, 30.8, 29.2, 28.7, 25.9, 23.5-23.1, 17.2; <sup>19</sup>F NMR (376.59 MHz, CDCl<sub>3</sub>): -77.964 (s, 3F), -78.248 (s, 3F); IR ν (cm<sup>-1</sup>) : 908, 1187, 1227, 1368, 1536, 2932, 3056, 3372; MS (ESI) M+1: 410.1

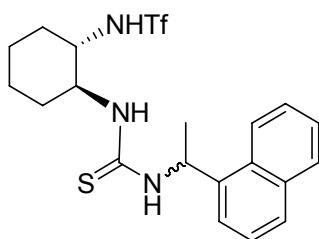

**1, 1, 1-trifluoro-N-((1S, 2S)-2-(3-(1-(naphthalen-1-yl)ethyl)thioureido)cyclohexyl) methane sulfonamide 4b**

1/1 mixture of diastereoisomers. Colourless oil; Yield: 100%; TLC

(SiO<sub>2</sub>), R<sub>f</sub>: 0.55 (cyclohexane/ethyl acetate : 70/30); <sup>1</sup>H NMR (400 MHz, CDCl<sub>3</sub>): 7.97-7.32 (m, 10H), 6.77(s, 1H), 4.30-4.16(s, 1H), 2.97(s, 1H), 2.02-1.95 (m, 1H), 1.75-1.72 (m, 1H), 1.59-0.87(m, 14H); <sup>13</sup>C NMR (100.62 MHz, CDCl<sub>3</sub>): 180.8, 180.0, 133.0, 128.2-127.8, 126.1-125.8, 125.2-124.6, 122.3-121.9, 120.4-120.3, 117.2-117.1, 60.9, 60.1, 56.0, 55.2, 49.5-49.3, 42.4, 33.2-32.8, 31.2, 30.7, 29.2, 28.7, 25.9, 23.5-23.1 ; <sup>19</sup>F NMR (376.59 MHz, CDCl<sub>3</sub>): -77.964 (s, 3F), -78.282 (s, 3F) ; IR ν (cm<sup>-1</sup>) : 1147, 1189, 1227, 1371, 1441, 1530, 2856, 2932, 3368 ; MS (ESI) M+1: 460.1.

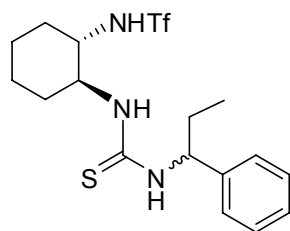

**1, 1, 1-trifluoro-N-((1S,2S)-2-(3-(1-phenylethyl)thioureido)cyclohexyl) methane sulfonamide 4c**

1/1 mixture of diastereoisomers : colourless oil; Yield: 100%; TLC (SiO<sub>2</sub>), R<sub>f</sub>: 0.45 (cyclohexane/ethyl acetate : 70/30) <sup>1</sup>H NMR (400 MHz, CDCl<sub>3</sub>): 7.34-7.20 (m, 5H) 6.74-6.65 (d, 1H), 5.78-5.13 (s, 1H), 4.32-4.18 (m, 1H), 3.07-2.88 (m, 1H), 2.09-1.1 (m, 10H), 0.86-0.80 (t, 3H); <sup>13</sup>C NMR (100.62 MHz, CDCl<sub>3</sub>): 181.1, 180.3, 138.9, 128.3, 127.2, 125.5, 120.2, 117.0, 60.4(t, 3C), 59.0, 56.2, 55.4, 33.4, 33.1, 31.2, 30.7, 29.6, 29.1, 25.9, 23.5-23.1, 9.5, 9.3; <sup>19</sup>F NMR (376.59 MHz, CDCl<sub>3</sub>): -77.464 (s, 3F) -77.676 (s, 3F); IR ν (cm<sup>-1</sup>) : 912, 1190, 1226, 1368, 1536, 2941, 3079, 3368; MS (ESI) M+1: 424.1

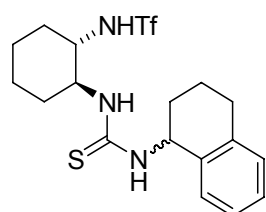

**1, 1, 1-trifluoro-N-((1S,2S)-2-(3-(1,2,3,4-tetrahydronaphthalen-1-yl)thioureido) cyclohexyl) methane sulfonamide 4d**

1/1 mixture of diastereoisomers : colourless oil; Yield: 100%; TLC (SiO<sub>2</sub>), R<sub>f</sub>: 0.50 (cyclohexane/ethyl acetate : 70/30); <sup>1</sup>H NMR (400 MHz, CDCl<sub>3</sub>): 7.22-7.01(m, 5H), 6.2(s, 1H), 5.75(s, 1H), 4.47-4.42(m, 1H), 3.62-3.56(m, 1H), 3.21<sup>1</sup>H NMR (400 MHz, CDCl<sub>3</sub>-3.14(m, 1H), 2.76-2.62(m, 2H), 2.11-1.68(m, 9H), 1.48-

0.04(m, 10H);  $^{13}\text{C}$  NMR (100.62 MHz,  $\text{CDCl}_3$ ): 182.4, 181.7, 134.3, 129.9-129.4, 127.7-127.4, 121.7-126.1, 123.8-123.3, 122.1, 62.3-61.9, 57.3-56.8, 51.2-50.6, 34.7-34.5, 32.8, 32.1, 30.5, 27.4, 25.-24.5;  $^{19}\text{F}$  NMR (376.59 MHz,  $\text{CDCl}_3$ ): -77.993 (s, 3F) 78.067 (s, 3F); IR  $\nu$  ( $\text{cm}^{-1}$ ): 916, 1146, 1188, 1227, 1370, 1536, 2860, 2932, 3372; MS (ESI) M+1: 436.1

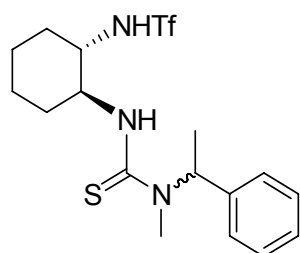

**1, 1, 1-trifluoro-N-((1S,2S)-2-(3-methyl-3-(1-phenylethyl)thioureido)cyclohexyl) methane sulfonamide 4e**

1/1 mixture of diastereoisomers: colourless oil; Yield: 100%; TLC ( $\text{SiO}_2$ ),  $R_f$ : 0.45 (cyclohexane/ethyl acetate : 70/30);  $^1\text{H}$  NMR (400 MHz,  $\text{CDCl}_3$ ): 7.29-7.16(m, 5H), 6.68(s, 1H), 5.45-5.43(s, 1H), 4.71-4.66(m, 1H), 3.26-3.18(m, 1H) 2.65(s, 3H), 2.14-2.10(m, 1H), 2.03-1.99(m, 1H), 1.71-1.68(m, 1H), 1.53-1.04(m, 8H);  $^{13}\text{C}$  NMR (100.62 MHz,  $\text{CDCl}_3$ ): 180.8, 180.7, 138.9, 138.6, 127.6, 126.6, 125.9, 120.5-120.4, 117.3-117.2, 61.7, 61.2, 57.6, 57.3, 56.4, 56.1, 33.7-33.4, 31.8-31.7, 30.1-29.9, 28.7, 14.6, 14.1;  $^{19}\text{F}$  NMR (376.59 MHz,  $\text{CDCl}_3$ ): -77.867 (s, 3F), -78.286 (s, 3F); IR  $\nu$  ( $\text{cm}^{-1}$ ): 908, 1187, 1227, 1368, 1536, 2932, 2944, 3056, 3385; MS (ESI) M+1: 424.1

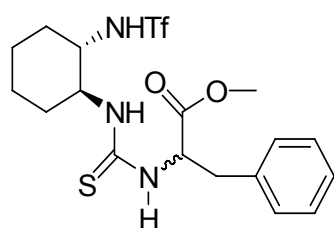

**Methyl-3-phenyl-2-(3-((1S,2S)-2-(trifluoromethylsulfonamido)cyclohexyl)thioureido)propanoate 4f**

1/1 mixture of diastereoisomers: Colourless oil; Yield: 100%; TLC ( $\text{SiO}_2$ ),  $R_f$ : 0.446 (cyclohexane/ethyl acetate : 70/30);  $^1\text{H}$  NMR (400 MHz,  $\text{CDCl}_3$ ): 7.22-7.12 (m, 3H), 7.05-7.02(m, 2H), 6.67-6.64(m, 1H), 6.40-6.38(m, 1H), 3.65-.55 (s, 3H), 3.17-.01(m, 2H), 2.01-1.08(m, 12H);  $^{13}\text{C}$  NMR (100.62 MHz,  $\text{CDCl}_3$ ): 181.9, 172.7, 171.7, 134.8-134.6, 128.3, 127.7-127.6, 126.2-126.1, 120.3, 117.1, 60.7, 57.3-57.2, 53.4-53.2, 37.2-36.9, 33.1, 31.3, 29.2, 25.9, 23.8-23.3, 20.1, 17.1, 13.1;  $^{19}\text{F}$  NMR (376.59 MHz,  $\text{CDCl}_3$ ): -77.276 (s, 3F) -

78.328 (s, 3F); IR  $\nu$  (cm<sup>-1</sup>) : 1147, 1188, 1227, 1373, 1530, 1725, 2861, 2941, 3061, 3359;

MS (ESI) M+1: 468.1.

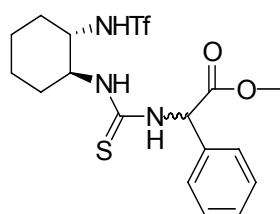

**Methyl-2-phenyl-2-(3-((1S, 2S)-2-(trifluoromethylsulfonamido)cyclohexyl)thioureido)acetate 4g**

1/1 mixture of diastereoisomers: colourless oil; Yield: 100%; TLC (SiO<sub>2</sub>), R<sub>f</sub>: 0.405 (cyclohexane/ethyl acetate : 70/30); <sup>1</sup>H NMR (400 MHz, CDCl<sub>3</sub>): 7.29-7.19 (m, 5H), 6.44 (s, 1H), 5.96 (s, 1H), 4.32-4.28 (m, 1H), 3.64-3.61 (s, 3H), 3.19-3.18 (m, 1H), 2.10-1.06 (m, 10H); <sup>13</sup>C NMR (100.62 MHz, CDCl<sub>3</sub>): 202.4, 191.4, 191.3, 155.6, 154.6, 148.6-148.2, 146.8-146.7, 140.8-140.7, 137.6-137.5, 81.3, 80.5, 75.9, 72.6-72.5, 53.6, 51.7-51.6, 49.6, 49.1, 43.9-43.7, 40.6, 37.6, 33.6, 20.5; <sup>19</sup>F NMR (376.59 MHz, CDCl<sub>3</sub>): -78.147 (s, 3F) -78.234 (s, 3F); IR  $\nu$  (cm<sup>-1</sup>) : 1147, 1189, 1227, 1371, 1535, 1722, 2856, 2941, 3048, 3368; MS (ESI) M+1: 454.1

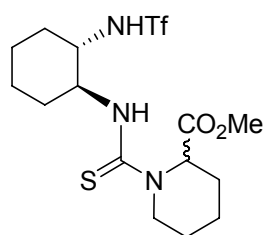

**Methyl-1-((1S, 2S)-2-(trifluoromethylsulfonamido)cyclohexylcarbamothioyl)piperidine-2-carboxylate 4h**

1/1 mixture of diastereoisomers: colourless oil; Yield: 100%; TLC (SiO<sub>2</sub>), R<sub>f</sub>: 0.432 (cyclohexane/ethyl acetate : 70/30); <sup>1</sup>H NMR (400 MHz, CDCl<sub>3</sub>): 5.71(s, 1H), 4.74-4.70 (m, 1H), 4.61-4.54 (m, 1H), 3.95 (s, 1H), 3.81-3.76 (m, 1H), 3.06-2.95 (m, 1H), 2.51-2.37 (m, 1H), 2.12-2.13 (m, 3H), 1.97-1.94 (m, 1H), 1.79-1.72 (m, 5H), 1.65-1.08 (m, 9H); <sup>13</sup>C NMR (100.62 MHz, CDCl<sub>3</sub>): 180.0, 179.6, 172.7, 172.7, 120.1-120, 117.0-116.9, 58.9, 57.2, 57.1, 55.1, 54.5, 44.1-43.7, 42.5, 33.3, 29.2, 26.8-25.9, 24.0-23.9, 23.5, 21.9-21.8; <sup>19</sup>F NMR (376.59 MHz, CDCl<sub>3</sub>): -77.915 (s, 3F) -78.099 (s, 3F) IR  $\nu$  (cm<sup>-1</sup>) : 922, 1185, 1371, 1499, 1723, 2358, 2856, 2937, 3159; MS (ESI) M+1: 400.1

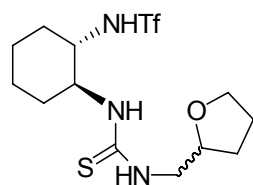

**1, 1, 1-trifluoro-N-((1S,2S)-2-(3-((tetrahydrofuran-2-yl)methyl)thioureido)cyclohexyl) methane sulfonamide 4i**

1/1 mixture of diastereoisomers: colourless oil; Yield: 100%; TLC (SiO<sub>2</sub>), R<sub>f</sub>: 0.243 (cyclohexane/ethyl acetate : 70/30); <sup>1</sup>H NMR (400 MHz, CDCl<sub>3</sub>): 7.91(s, 1H), 7.2-7.0(s, 1H), 4.3(s, 1H), 3.9-3.7(m, 4H), 3.2(m, 2H), 2.1-1.2(m, 14H); <sup>13</sup>C NMR (100.62 MHz, CDCl<sub>3</sub>): 182.6, 182.4, 120.4-120.3, 117.3-117.1, 67.4, 61.2, 47.3, 33.5-33.3, 31.3-31.1, 29.2, 28.7, 25.9, 24.9, 24.7, 23.6, 23.4-23.3; <sup>19</sup>F NMR (376.59 MHz, CDCl<sub>3</sub>): -77.873 (s, 3F) -78.234 (s, 3F); IR ν (cm<sup>-1</sup>): 916, 1067, 1186, 1227, 1371, 2936, 3266; MS (ESI) M+1: 390.1

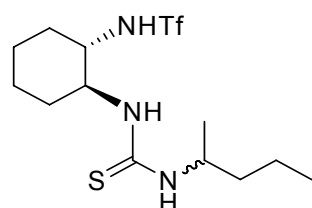

**1, 1, 1-trifluoro-N-((1S,2S)-2-(3-pentan-2-ylthioureido)cyclohexyl)methanesulfonamide 4j**

1/1 mixture of diastereoisomers: colourless oil; Yield: 100%; TLC (SiO<sub>2</sub>), R<sub>f</sub>: 0.514 (cyclohexane/ethyl acetate : 70/30); <sup>1</sup>H NMR (400 MHz, CDCl<sub>3</sub>): 6.15-6.12 (m, 1H), 4.43-4.37 (m, 1H), 3.23-3.18 (m, 1H), 2.93-2.82 (s, 1H), 2.14-1.99 (m, 2H), 1.72-1.70 (m, 2H), 1.51-1.16 (m, 8H), 1.14-1.09 (m, 3H), 0.87-0.83 (m, 3H); <sup>13</sup>C NMR (100.62 MHz, CDCl<sub>3</sub>): 188.3, 162.0, 123.6, 120.4, 117.2, 61.0, 59.7, 55.4, 49.0, 37.8-37.7, 30.7, 29.2, 25.9, 23.6-23.4, 19.5, 19.1 18.1-18.0, 17.3, 12.9; <sup>19</sup>F NMR (376.47 MHz, CDCl<sub>3</sub>): -77.633 (s, 3F) -77.653 (s, 3F); IR ν (cm<sup>-1</sup>): 1370, 2350, 2856, 2928, 3266, 3382; MS (ESI) M+1: 376.1



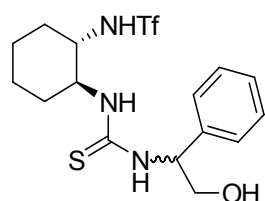

**1, 1, 1-trifluoro-N-((1S, 2S)-2-(3-(2-hydroxy-1-phenylethyl)thioureido)cyclohexyl)methane sulfonamide 4k**

1/1 mixture of diastereoisomers: colourless oil; Yield: 100%. TLC (SiO<sub>2</sub>), R<sub>f</sub>: 0.189 (cyclohexane/ethyl acetate : 70/30). <sup>1</sup>H NMR (400 MHz, CDCl<sub>3</sub>): 7.34-7.19 (m, 5H), 6.98-6.91(s, 1H), 6.30-6.02 (m, 1H), 4.38-4.25 (m, 1H), 3.90-3.77 (m, 2H), 3.17-3.10 (m, 1H), 2.10-1.95 (m, 2H), 1.72-0.77 (m, 10H). <sup>13</sup>C NMR (100.62 MHz, CDCl<sub>3</sub>): 181.9, 180.6, 128.2, 127.2, 125.7, 120.2, 117.0, 65.0, 60.4, 59.7-58.9, 57.4, 55.8, 42.5, 32.9-32.7, 31.3-31.0, 29.2, 28.7 25.9, 23.5-23.3, 17.2; <sup>19</sup>F NMR (376.59 MHz, CDCl<sub>3</sub>): -77.788 (s, 3F) - 77.936 (s, 3F); IR ν(cm<sup>-1</sup>): 1370, 1450, 1539, 2861, 2937, 3057, 3372; MS (ESI) M+1: 426.1

#### IV. Characterization data of each diastereoisomer for selected thioureas

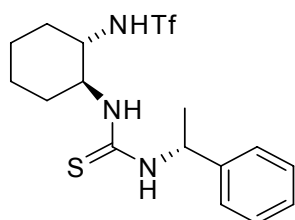

**1, 1, 1-trifluoro-N-((1S, 2S)-2-(3-((R)-1-phenylethyl)thioureido)cyclohexyl) methane sulfonamide**

Colourless oil; <sup>1</sup>H NMR (400MHz, CDCl<sub>3</sub>): 7.42-7.24(m, 5H), 6.48(s, 1H), 5.28(s, 1H), 4.63(s, 1H), 4.23(s, 1H), 3.08(m, 1H), 2.07-2.03(s, 1H), 1.73-1.03(m, 10H); <sup>13</sup>C NMR (100.62MHz, CDCl<sub>3</sub>): 181.5, 141.3, 129.4, 128.4, 125.7, 121.4, 118.2, 61.2, 57.3, 53.9, 34.0, 31.8, 24.4, 24.2; <sup>19</sup>F NMR (188.295 MHz, CDCl<sub>3</sub>): -78.274; IR: 908, 1187, 1227, 1368, 1536, 2932, 3056, 3372; MS (ESI) M+1: 410.1

Specific rotation [α]<sub>D</sub><sup>20</sup> - 52.33 (c = 0.34, CH<sub>2</sub>Cl<sub>2</sub>)

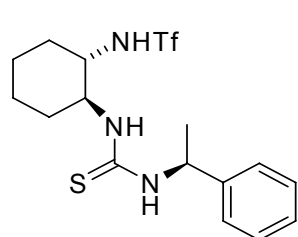

**1, 1, 1-trifluoro-N-((1S, 2S)-2-(3-((S)-1-phenylethyl)thioureido)cyclohexyl) methane sulfonamide**

Colourless oil;  $^1\text{H}$  NMR (400MHz,  $\text{CDCl}_3$ ): 7.36-7.19 (m, 5H), 6.40(s, 1H), 5.38(s, 1H), 4.74(s, 1H), 4.34(s, 1H), 2.95(m, 1H), 2.1-2.06(m, 1H), 1.93-1.91(m, 1H), 1.69-1.09(m, 10H);  $^{13}\text{C}$  NMR (100.62MHz,  $\text{CDCl}_3$ ): 182.06, 141.68, 129.54, 128.42, 125.83, 121.19, 118, 61.99, 56.57, 54.55, 34.32, 32.66, 24.56-24.13;  $^{19}\text{F}$  NMR (188.295 MHz,  $\text{CDCl}_3$ ): -77.993; IR: 908, 1187, 1227, 1368, 1536, 2932, 3056, 3372; MS (ESI) M+1: 410.1; Specific rotation  $[\alpha]_{\text{D}}^{20}$  - 16 (c = 0.35,  $\text{CH}_2\text{Cl}_2$ )

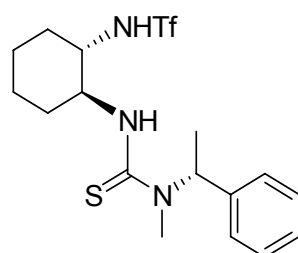

**1, 1, 1-trifluoro-N-((1S,2S)-2-(3-methyl-3-((R)-1-phenylethyl)thioureido)cyclohexyl) methane sulfonamide**

Colourless oil;  $^1\text{H}$  NMR (400MHz,  $\text{CDCl}_3$ ): 7.30-7.23 (m, 5H), 6.73(s, 1H), 4.76-4.66 (m, 1H), 3.68-3.63 (m, 1H), 3.26-3.19(m, 1H), 2.87(s, 3H), 2.18-2.13(m, 1H), 2.06-2.03(m, 1H), 1.75(m, 2H), 1.54-1.15(m, 10H);  $^{13}\text{C}$  NMR (100.62MHz,  $\text{CDCl}_3$ ): 182.0, 139.6, 128.7, 127.7, 127.0, 121.3, 118.1, 62.1, 58.4, 58.3, 34.3, 33.0, 31.1, 29.7, 18.4, 15.7;  $^{19}\text{F}$  NMR (188.295 MHz,  $\text{CDCl}_3$ ): -78.289; IR: 908, 1187, 1227, 1368, 1536, 2932, 2944, 3056, 3385; MS (ESI) M+1: 424.1; Specific rotation  $[\alpha]_{\text{D}}^{20}$  - 106.1 (c = 0.34,  $\text{CH}_2\text{Cl}_2$ ).

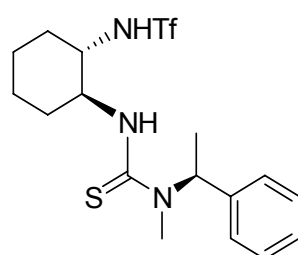

**1, 1, 1-trifluoro-N-((1S,2S)-2-(3-methyl-3-((S)-1-phenylethyl)thioureido)cyclohexyl) methane sulfonamide**

Colourless oil;  $^1\text{H}$  NMR (400MHz,  $\text{CDCl}_3$ ): 7.30-7.19(m, 5H), 6.71(s, 1H), 5.33-5.31(m, 1H), 4.79-4.70(m, 1H), 3.24-3.17(m, 1H),

2.67(s, 1H), 2.17-2.13(m, 1H), 2.05-2.03(m, 1H), 1.75-1.72(m, 2H), 1.56-1.05(m, 10H);  $^{13}\text{C}$  NMR (100.62MHz,  $\text{CDCl}_3$ ): 182.0, 140.0, 128.7, 127.6, 127.0, 121.45, 118.3, 62.8, 58.6, 57.1, 34.7, 32.9, 24.8-24.5, 15.2;  $^{19}\text{F}$  NMR (188.295 MHz,  $\text{CDCl}_3$ ): -77.861; IR: 908, 1187, 1227, 1368, 1536, 2932, 2944, 3056, 3385; MS (ESI) M+1: 424.1. Specific rotation  $[\alpha]_{\text{D}}^{20} + 40$  (c = 0.57,  $\text{CH}_2\text{Cl}_2$ ).

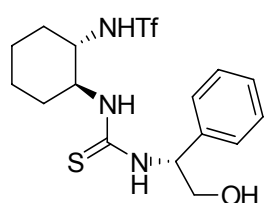

**1, 1, 1-trifluoro-N-((1S, 2S)-2-(3-((R)-2-hydroxy-1-phenylethyl)thioureido)cyclohexyl)methane sulfonamide**

Colourless oil;  $^1\text{H}$  NMR (400MHz,  $\text{CDCl}_3$ ): 7.65 (s, 1H), 7.30-7.19 (m, 5H), 6.39 (m, 1H), 4.33-4.29 (m, 1H), 3.86-3.51, (m, 5H), 1H), 3.17-3.11(m, 2H), 2.07-1.91 (m, 4H), 1.67-1.11 (m, 10H);  $^{13}\text{C}$  NMR (100.62MHz,  $\text{CDCl}_3$ ): 183.0, 129.1, 128.3, 126.7, 121.1, 118.0, 66.0, 60.6, 60.4, 56.9, 33.9, 32.3, 29.7, 24.5, 24.3;  $^{19}\text{F}$  NMR (188.295 MHz,  $\text{CDCl}_3$ ): -77.792; IR: 1370, 1450, 1539, 2861, 2937, 3057, 3372; MS (ESI) M+1: 426.1. Specific rotation  $[\alpha]_{\text{D}}^{20} + -24.5$  (c = 0.4,  $\text{CH}_2\text{Cl}_2$ ).

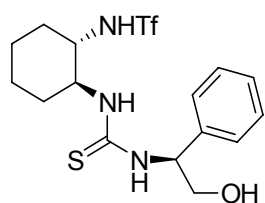

**1, 1, 1-trifluoro-N-((1S, 2S)-2-(3-((S)-2-hydroxy-1-phenylethyl)thioureido)cyclohexyl)methane sulfonamide**

Colourless oil;  $^1\text{H}$  NMR (400MHz,  $\text{CDCl}_3$ ): 7.62 (s, 1H), 7.33-7.23 (m, 5H), 5.85(s, 1H), 5.13 (s, 1H), 4.19 (s, 1H), 3.78-3.46 (m, 3H), 3.17-3.09 (m, 1H), 2.05-2.01 (m, 1H), 1.64-0.66 (m, 10H);  $^{13}\text{C}$  NMR (100.62MHz,  $\text{CDCl}_3$ ): 171.5, 129.2, 128.7, 128.6, 128.5, 126.7, 121.2, 118.1, 66.0, 60.8; 60.0, 57.7; 57.6, 33.8, 32.0, 29.7, 27.0, 24.5, 14.2;  $^{19}\text{F}$  NMR (188.295 MHz,  $\text{CDCl}_3$ ): -77.929; IR: 1370, 1450, 1539, 2861, 2937, 3057, 3372; MS (ESI) M+1: 426.1; Specific rotation  $[\alpha]_{\text{D}}^{20} - 15.9$  (c = 0.26,  $\text{CH}_2\text{Cl}_2$ ).

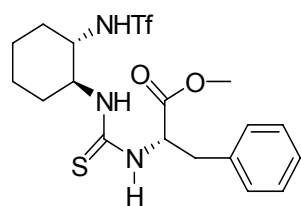

**(S)-Methyl-3-phenyl-2-(3-((1S, 2S)-2-(trifluoromethylsulfonamido)cyclohexyl)thioureido)propanoate**

Colourless oil;  $^1\text{H}$  NMR (400MHz,  $\text{CDCl}_3$ ): 7.35-7.34 (m, 1H), 7.32-7.24 (m, 5H), 6.54 (s, 1H), 5.98 (s, 1H), 4.35-4.28 (m, 1H), 4.06-4.00 (m, 1H), 3.61 (s, 3H), 3.22-3.17 (m, 1H), 2.13-2.07 (m, 1H), 1.97 (s, 1H), 1.93-1.91 (m, 1H), 1.69-1.12 (m, 10H);  $^{13}\text{C}$  NMR (100.62MHz,  $\text{CDCl}_3$ ): 183.0, 172.0, 139.3, 129.3, 129.0, 128.1, 127.4, 124.5, 121.3, 118.2, 115.0, 62.1, 61.0, 60.7, 58.5, 56.3, 53.0, 34.2, 24.5; 24.3, 21.1, 18.2, 14.13;  $^{19}\text{F}$  NMR (188.295 MHz,  $\text{CDCl}_3$ ): -78.324; IR: 1147, 1189, 1227, 1371, 1535, 1722, 2856, 2941, 3048, 3368; MS (ESI)  $\text{M}+1$ : 454.1; Specific rotation  $[\alpha]_{\text{D}}^{20}$  - 89.8 (c = 0.19,  $\text{CH}_2\text{Cl}_2$ ).

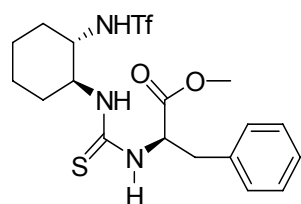

**(R)-Methyl-3-phenyl-2-(3-((1S, 2S)-2-(trifluoromethylsulfonamido)cyclohexyl)thioureido)propanoate**

Colourless oil;  $^1\text{H}$  NMR (400MHz,  $\text{CDCl}_3$ ): 7.33-7.28(m, 5H), 7.10-7.07 (m, 1H), 6.01 (s, 1H), 5.89 (s, 1H), 4.39-4.31 (m, 1H), 3.66 (s, 3H), 3.20-3.15 (m, 1H), 2.13-2.10 (m, 1H), 1.98-1.94 (m, 1H), 1.71-1.08 (m, 10H);  $^{13}\text{C}$  NMR (100.62MHz,  $\text{CDCl}_3$ ): 183.3, 171.7, 135.3, 129.1, 127.3, 121.3, 118.1, 61.8, 61.0, 60.6, 56.3, 53.1, 34.3, 32.2, 29.7, 26.9, 24.4; 24.3, 21.0, 14.1.  $^{19}\text{F}$  NMR (188.295 MHz,  $\text{CDCl}_3$ ): -78.269; IR: 1147, 1189, 1227, 1371, 1535, 1722, 2856, 2941, 3048, 3368. MS (ESI)  $\text{M}+1$ : 454.1; Specific rotation  $[\alpha]_{\text{D}}^{20}$  + 28.0 (c = 0.35,  $\text{CH}_2\text{Cl}_2$ ).

## V. $^1\text{H}$ , $^{13}\text{C}$ and $^{19}\text{F}$ NMR spectra for **2** and for diastereoisomeric mixture of all thioureas

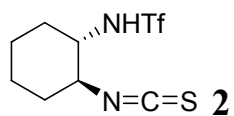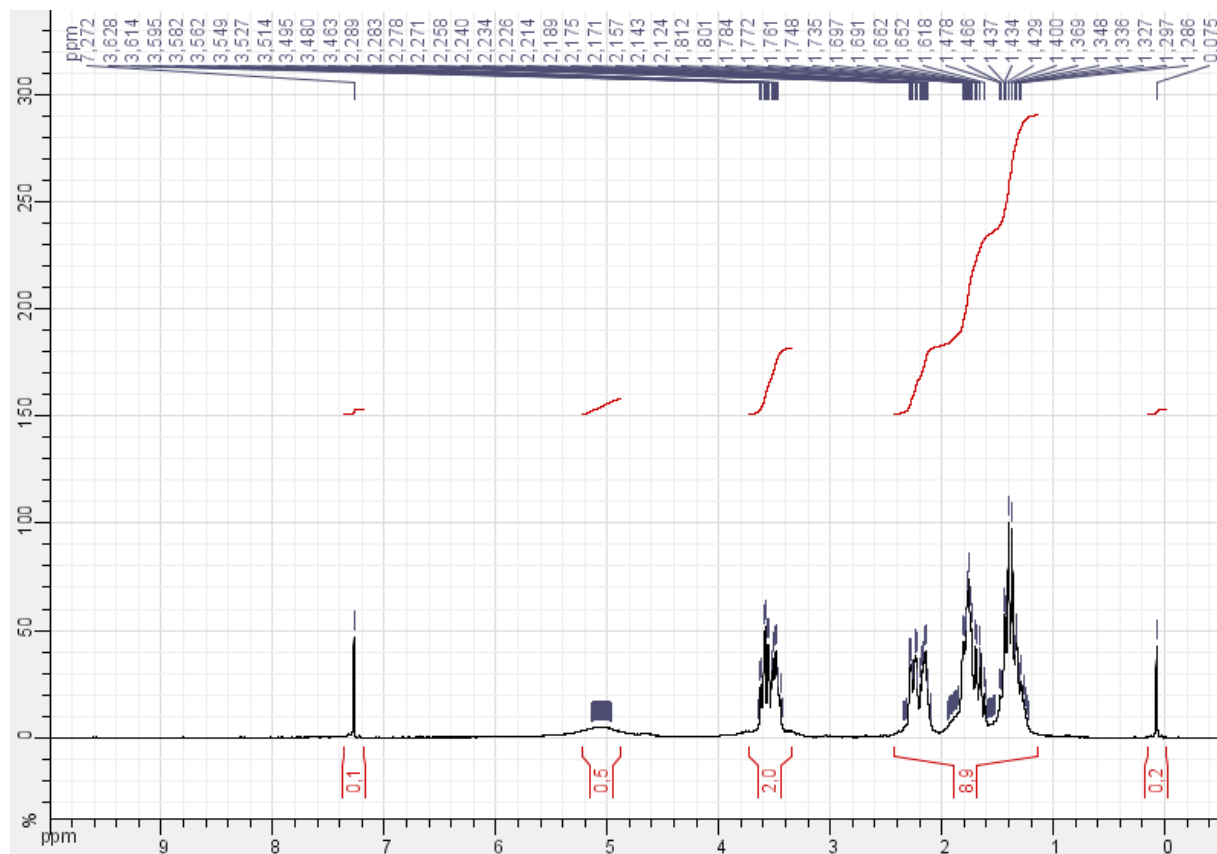

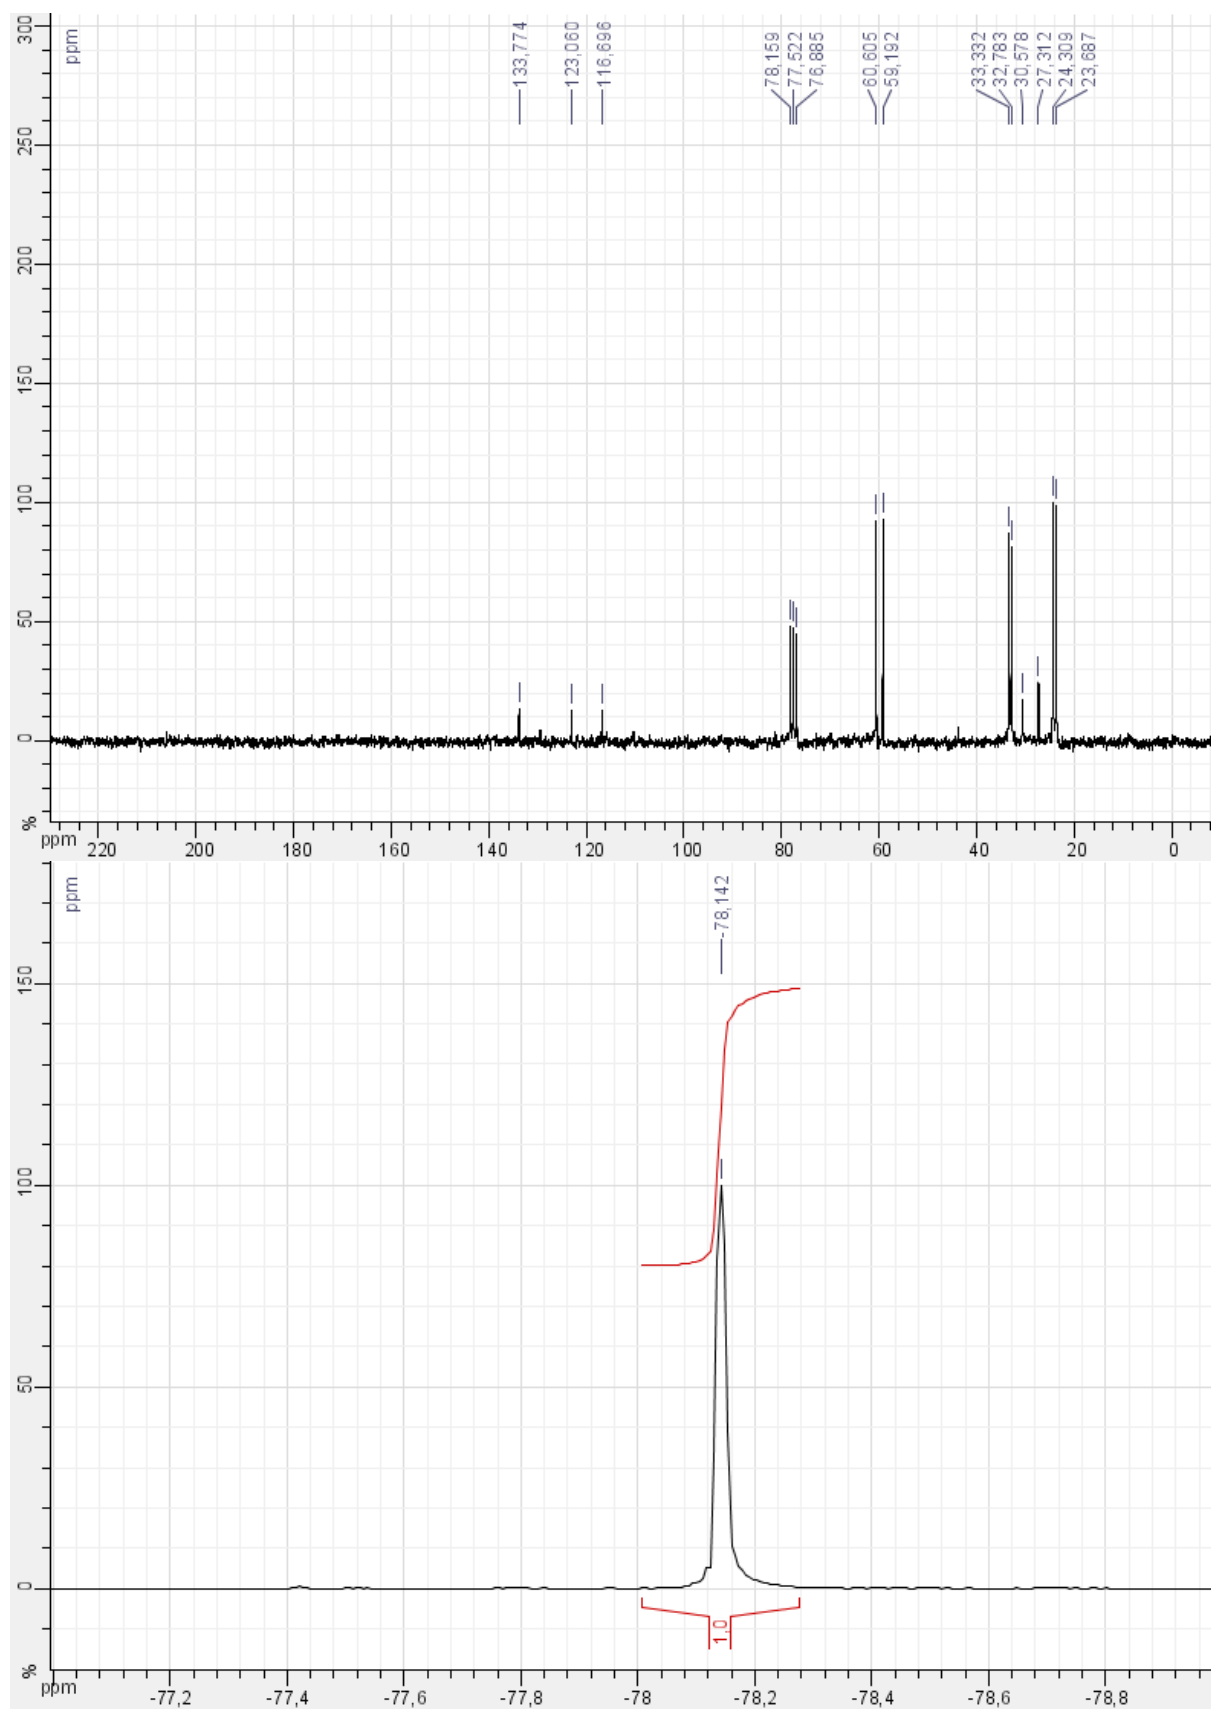

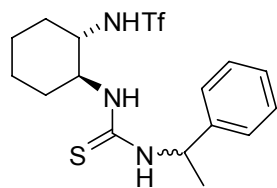

4a

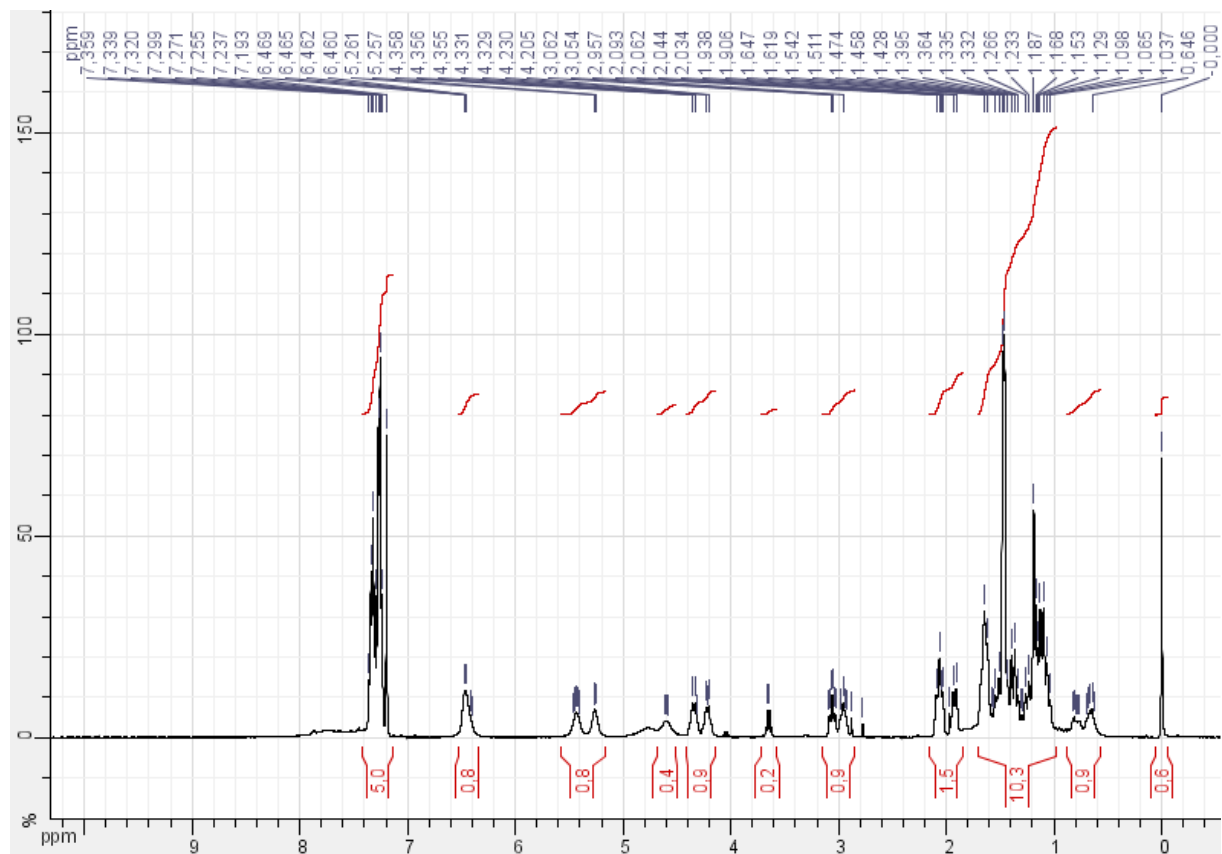

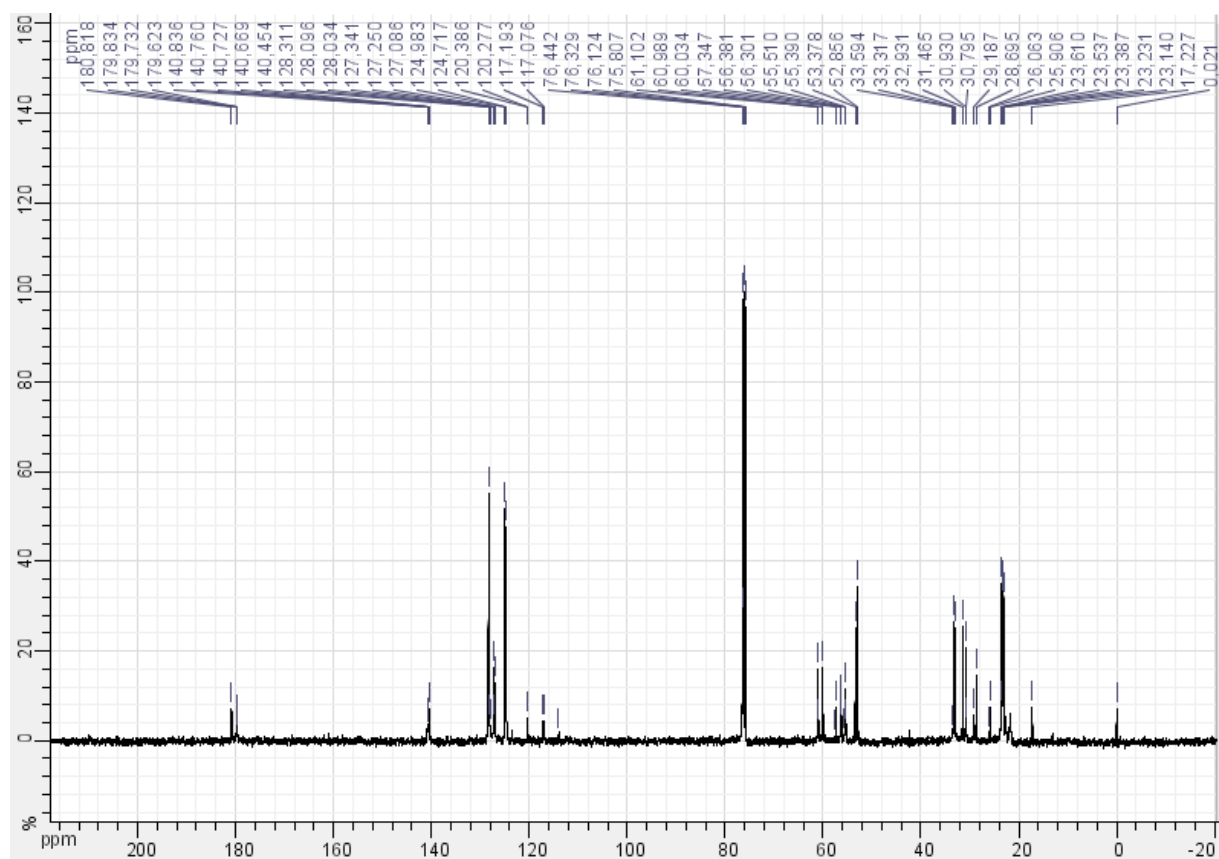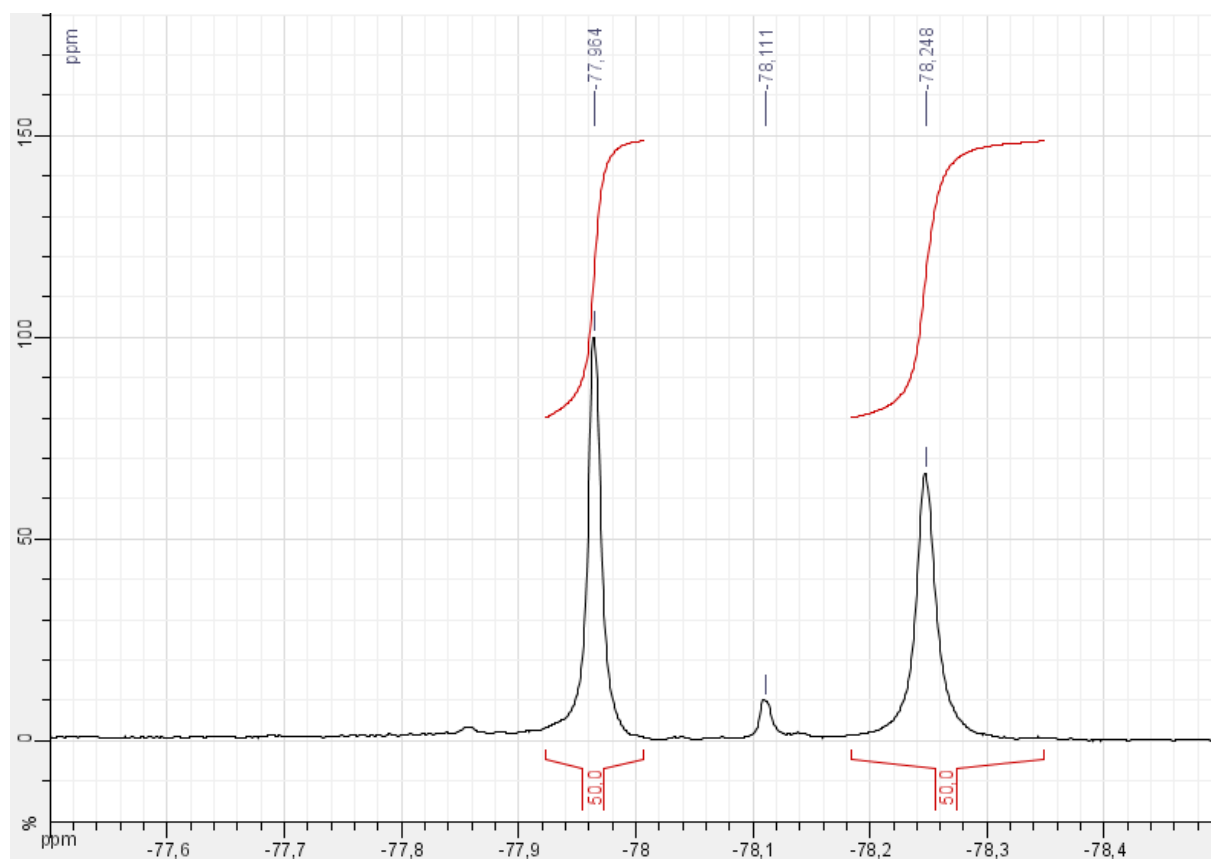



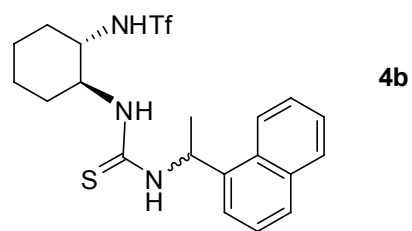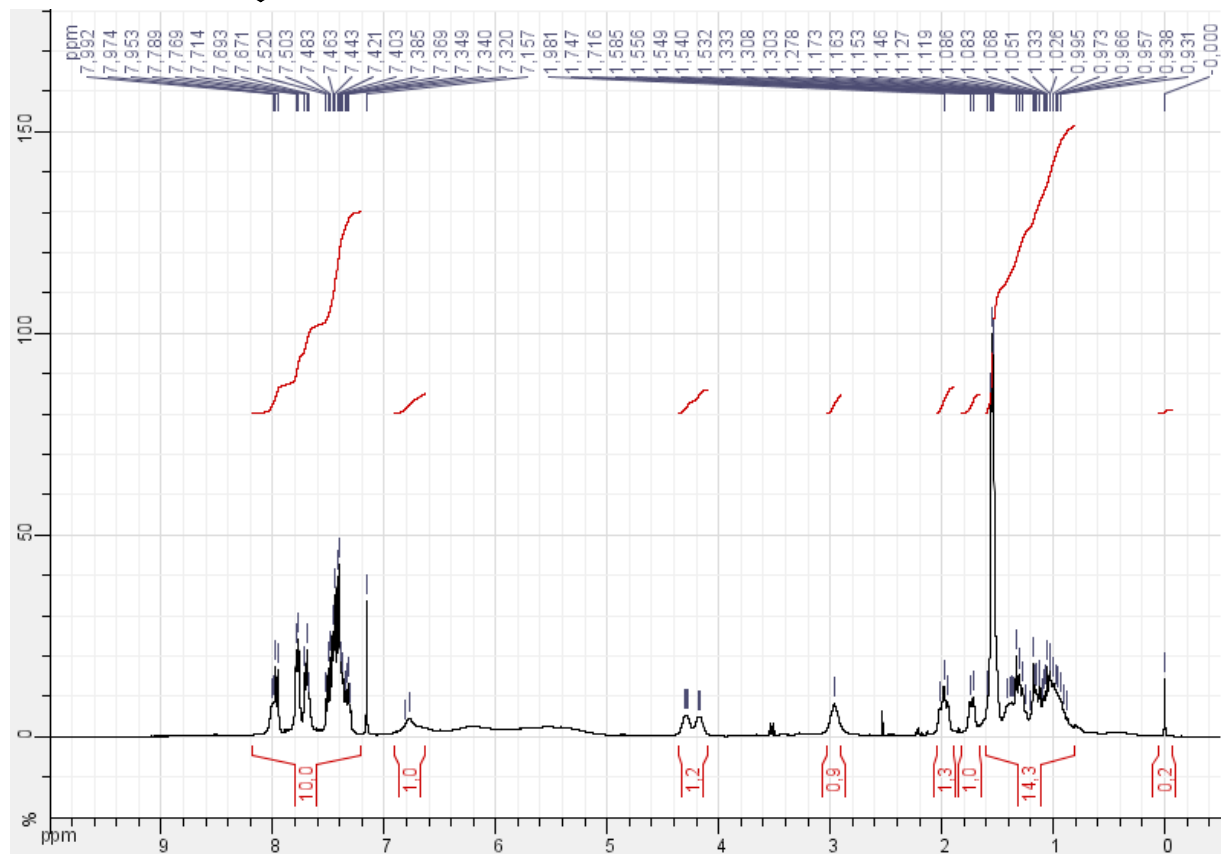

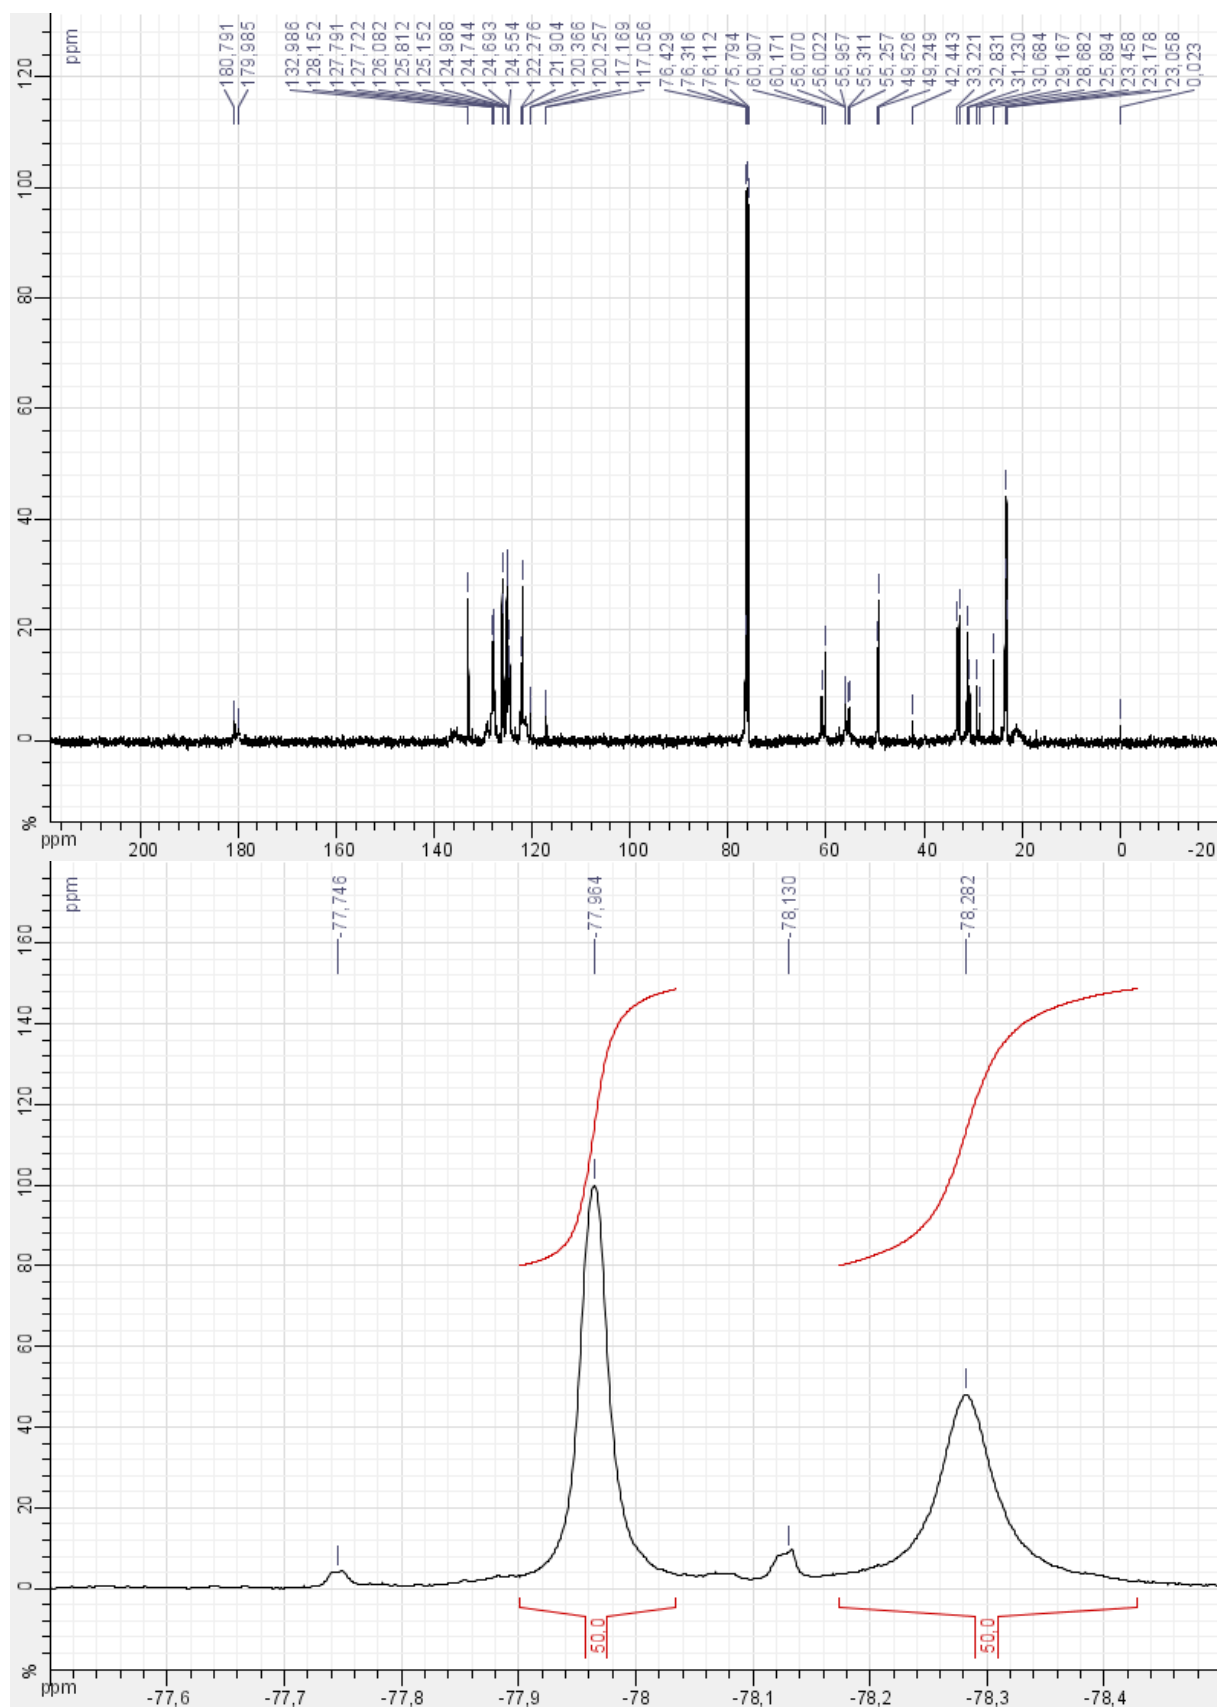

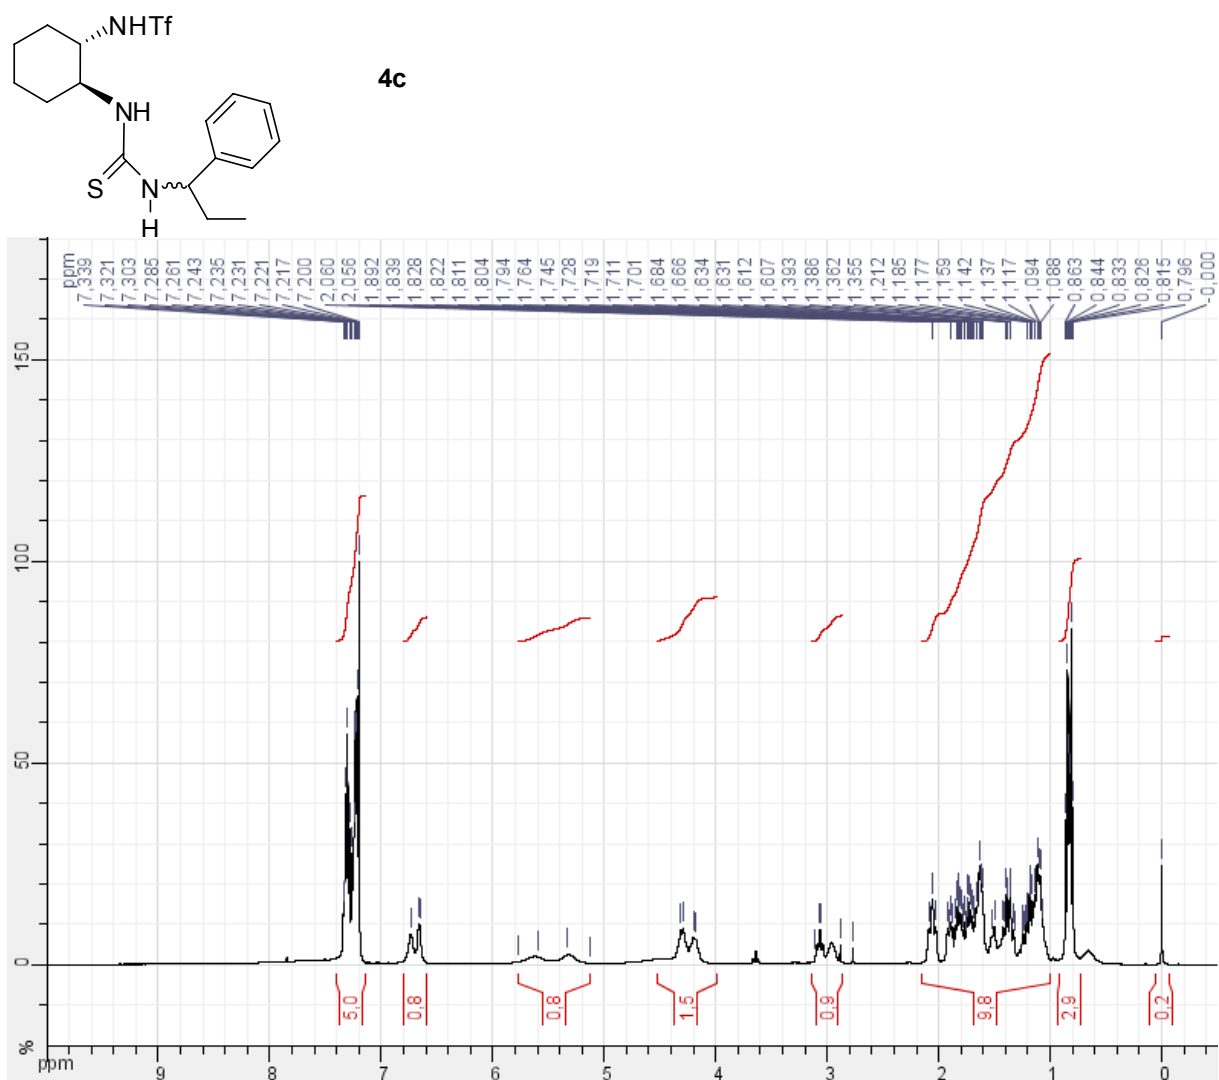

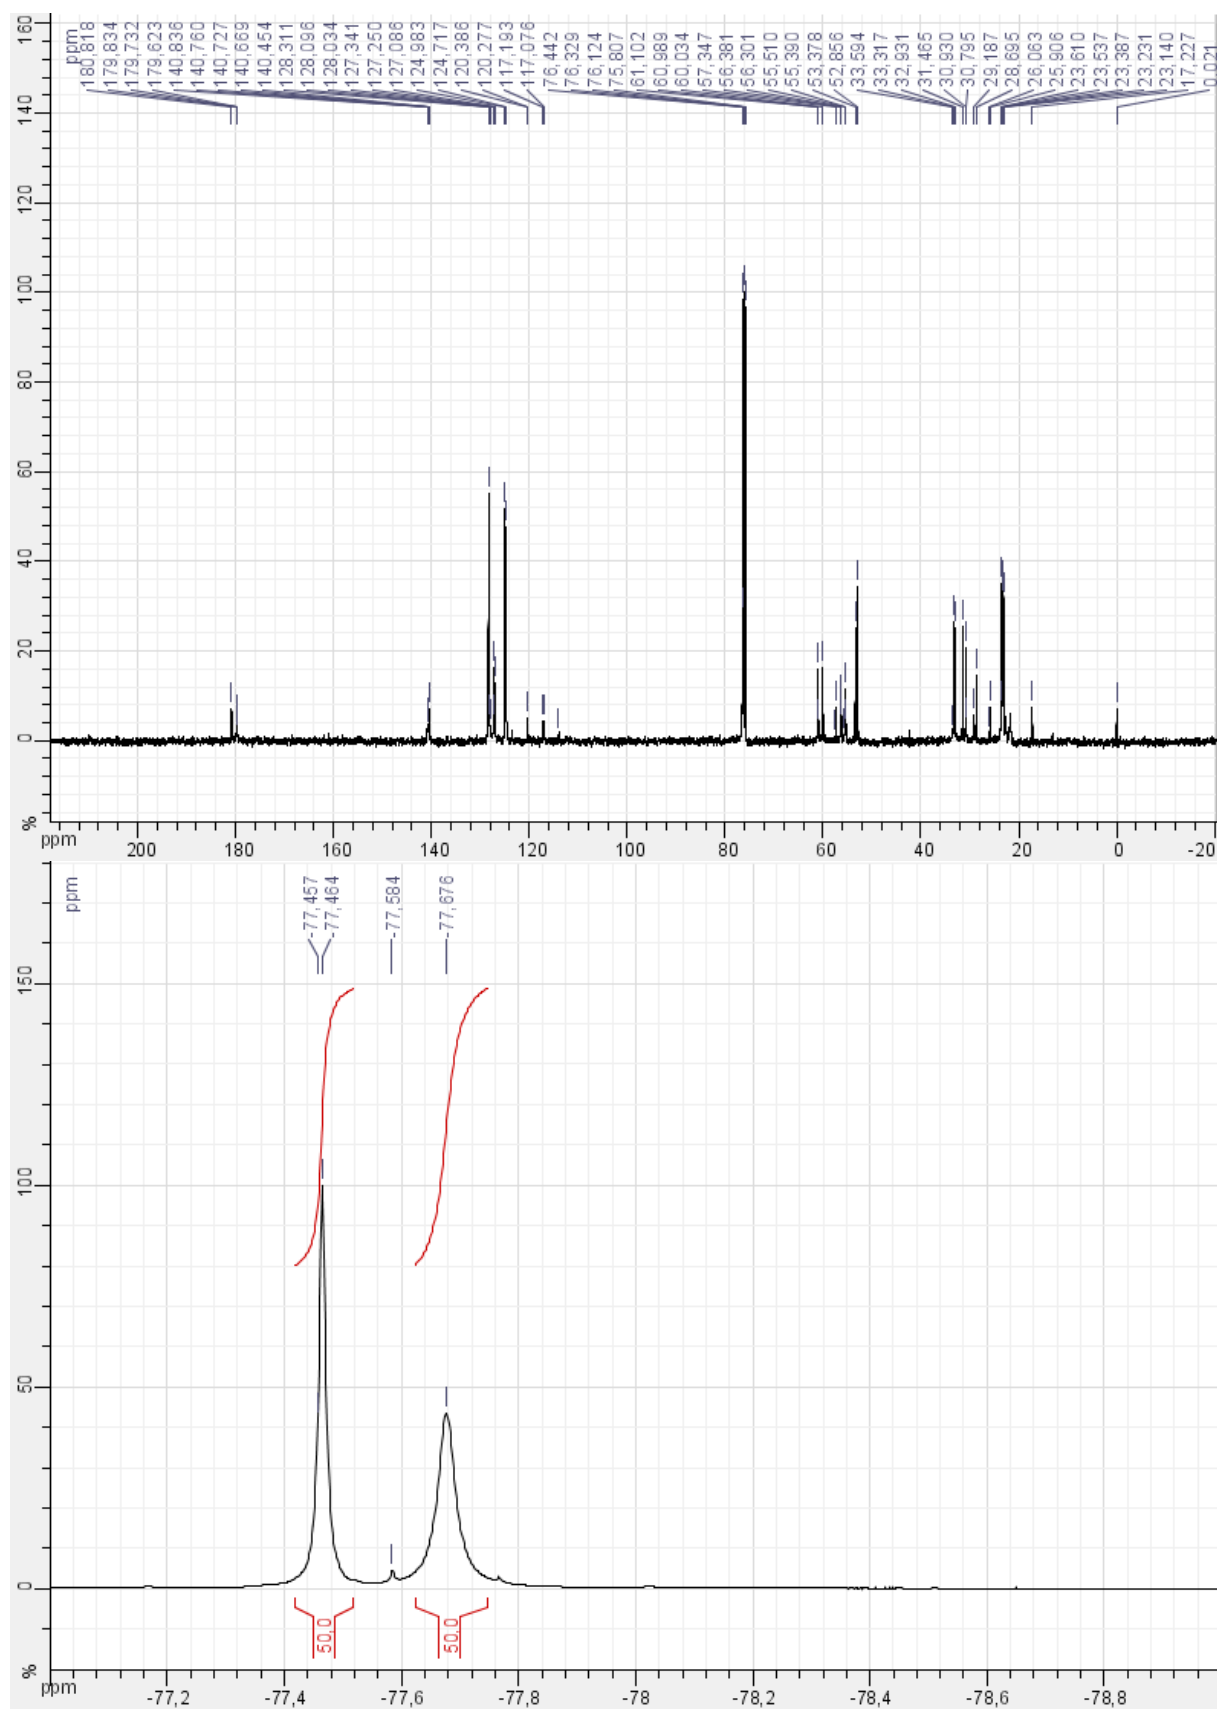

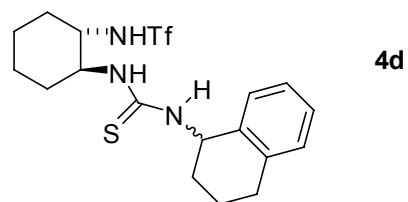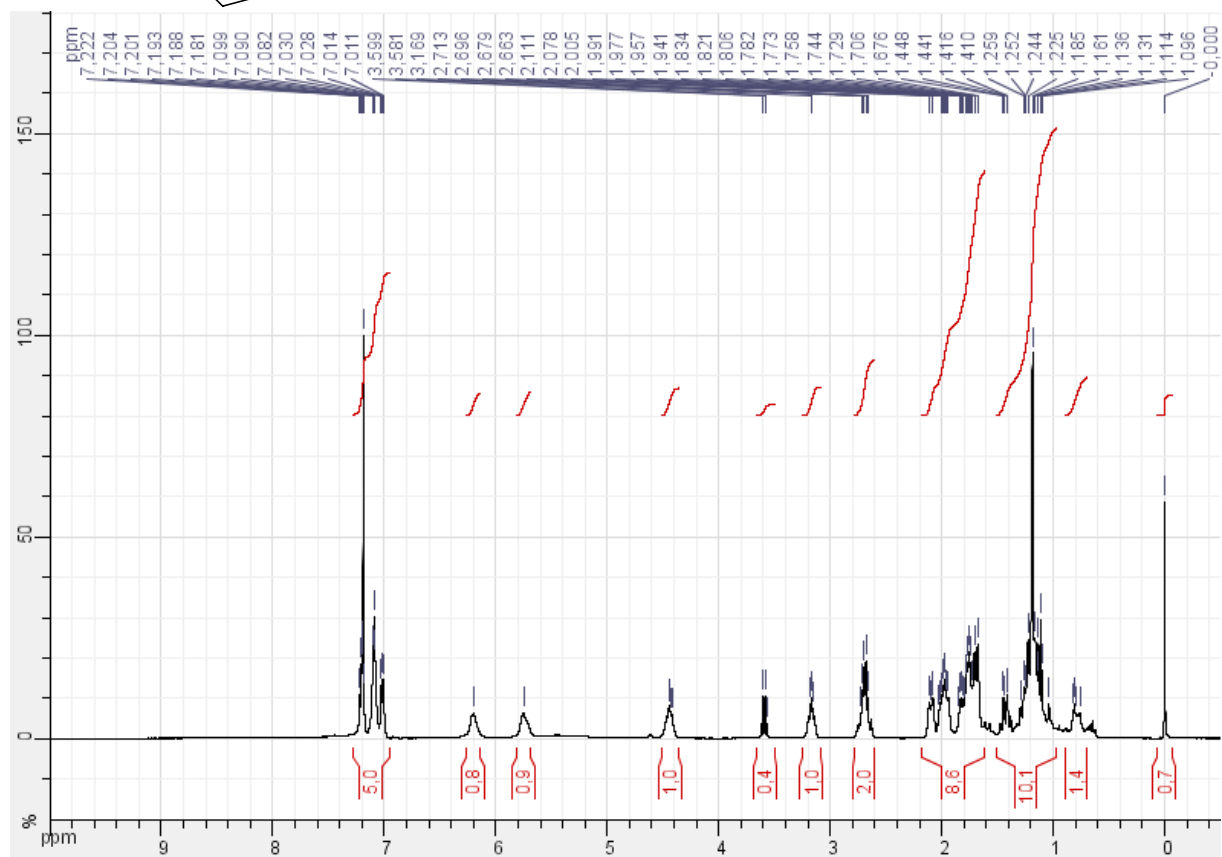

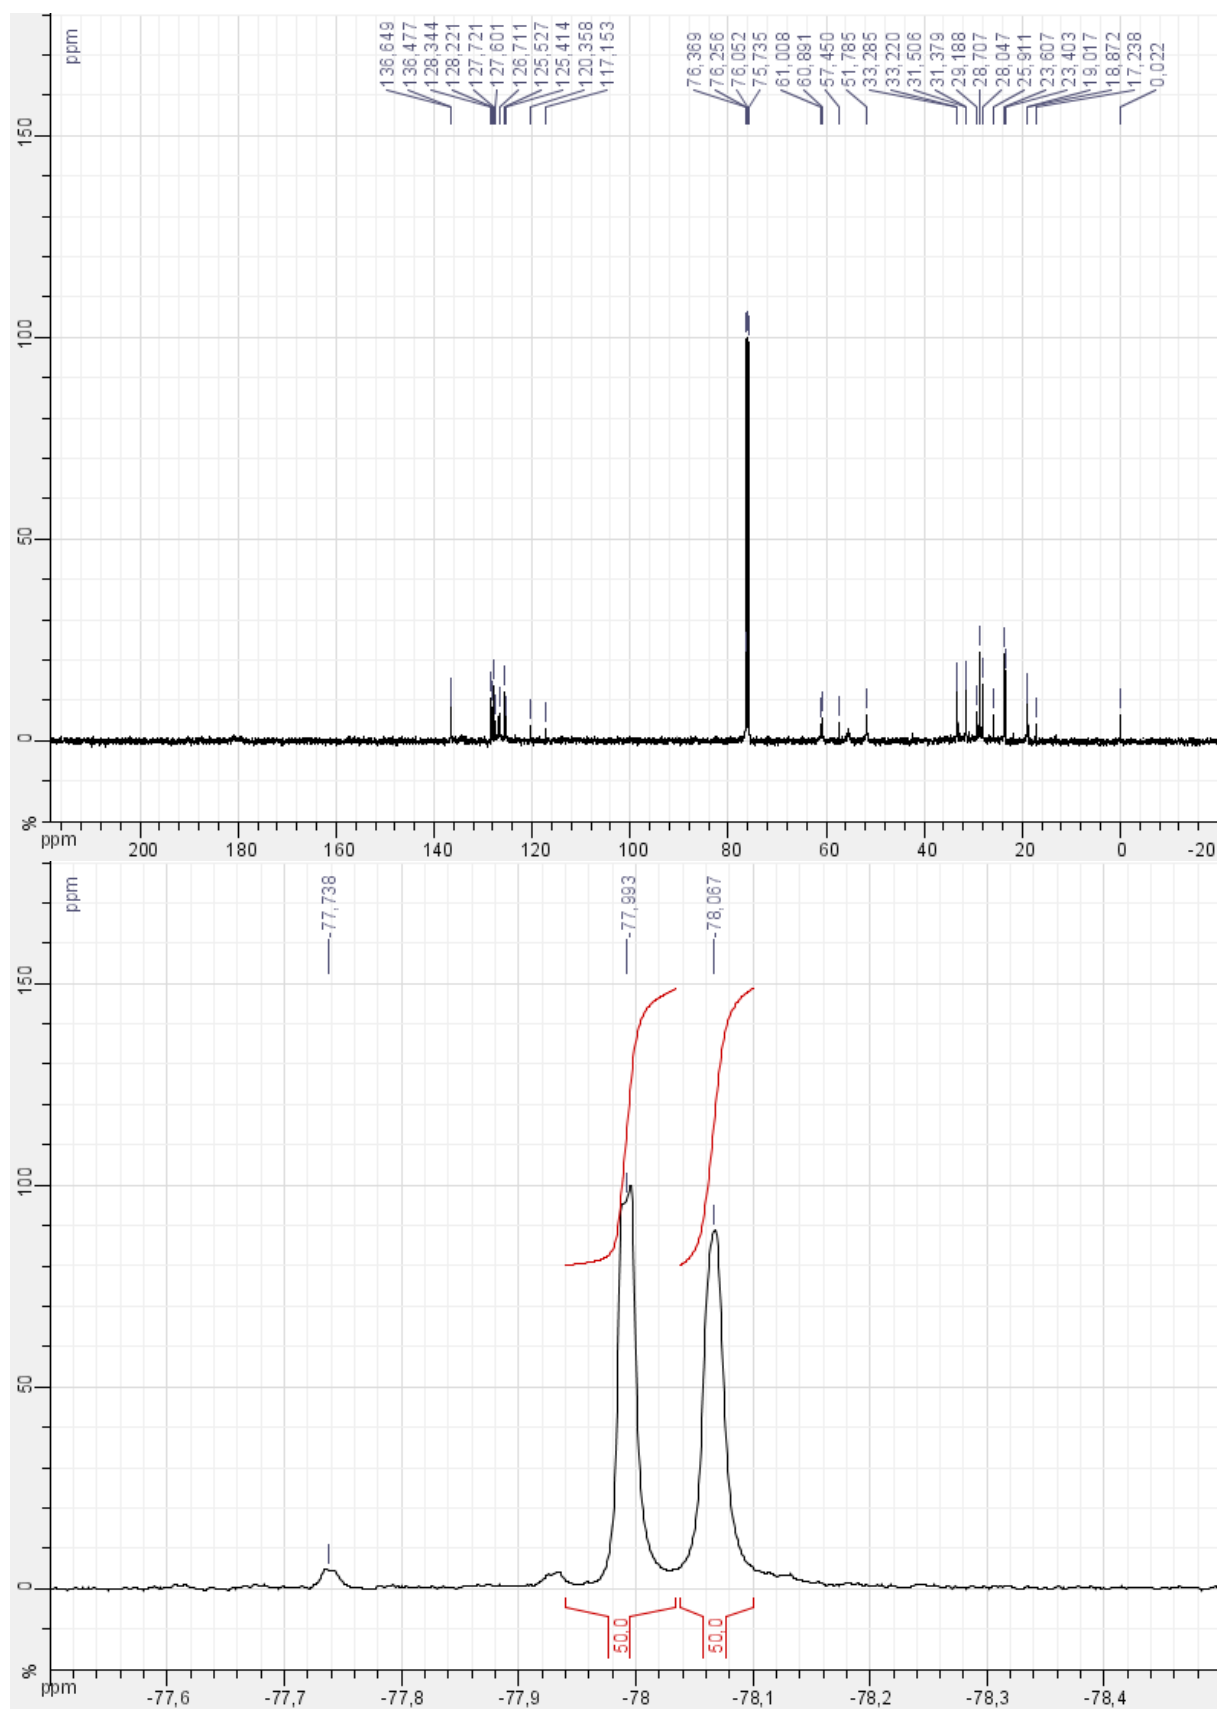

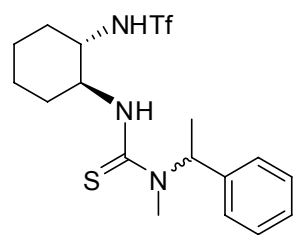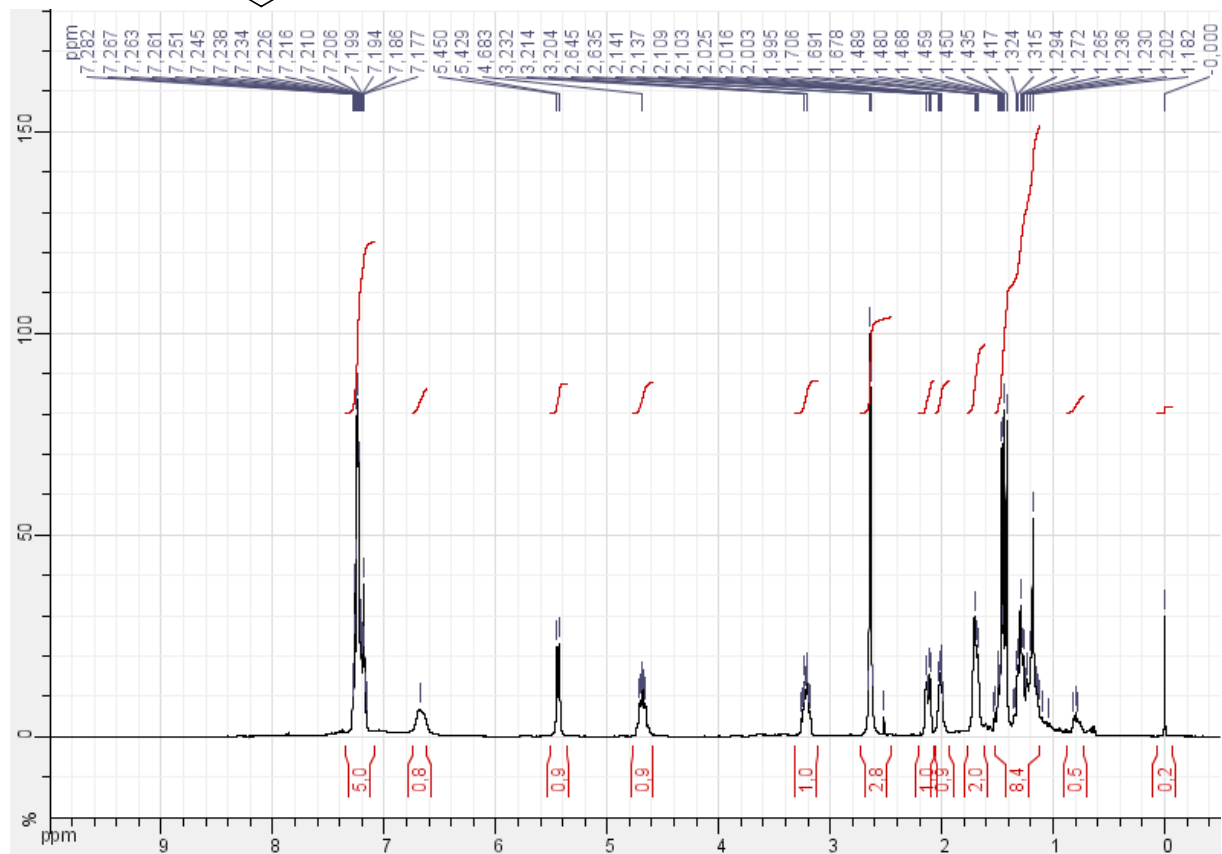

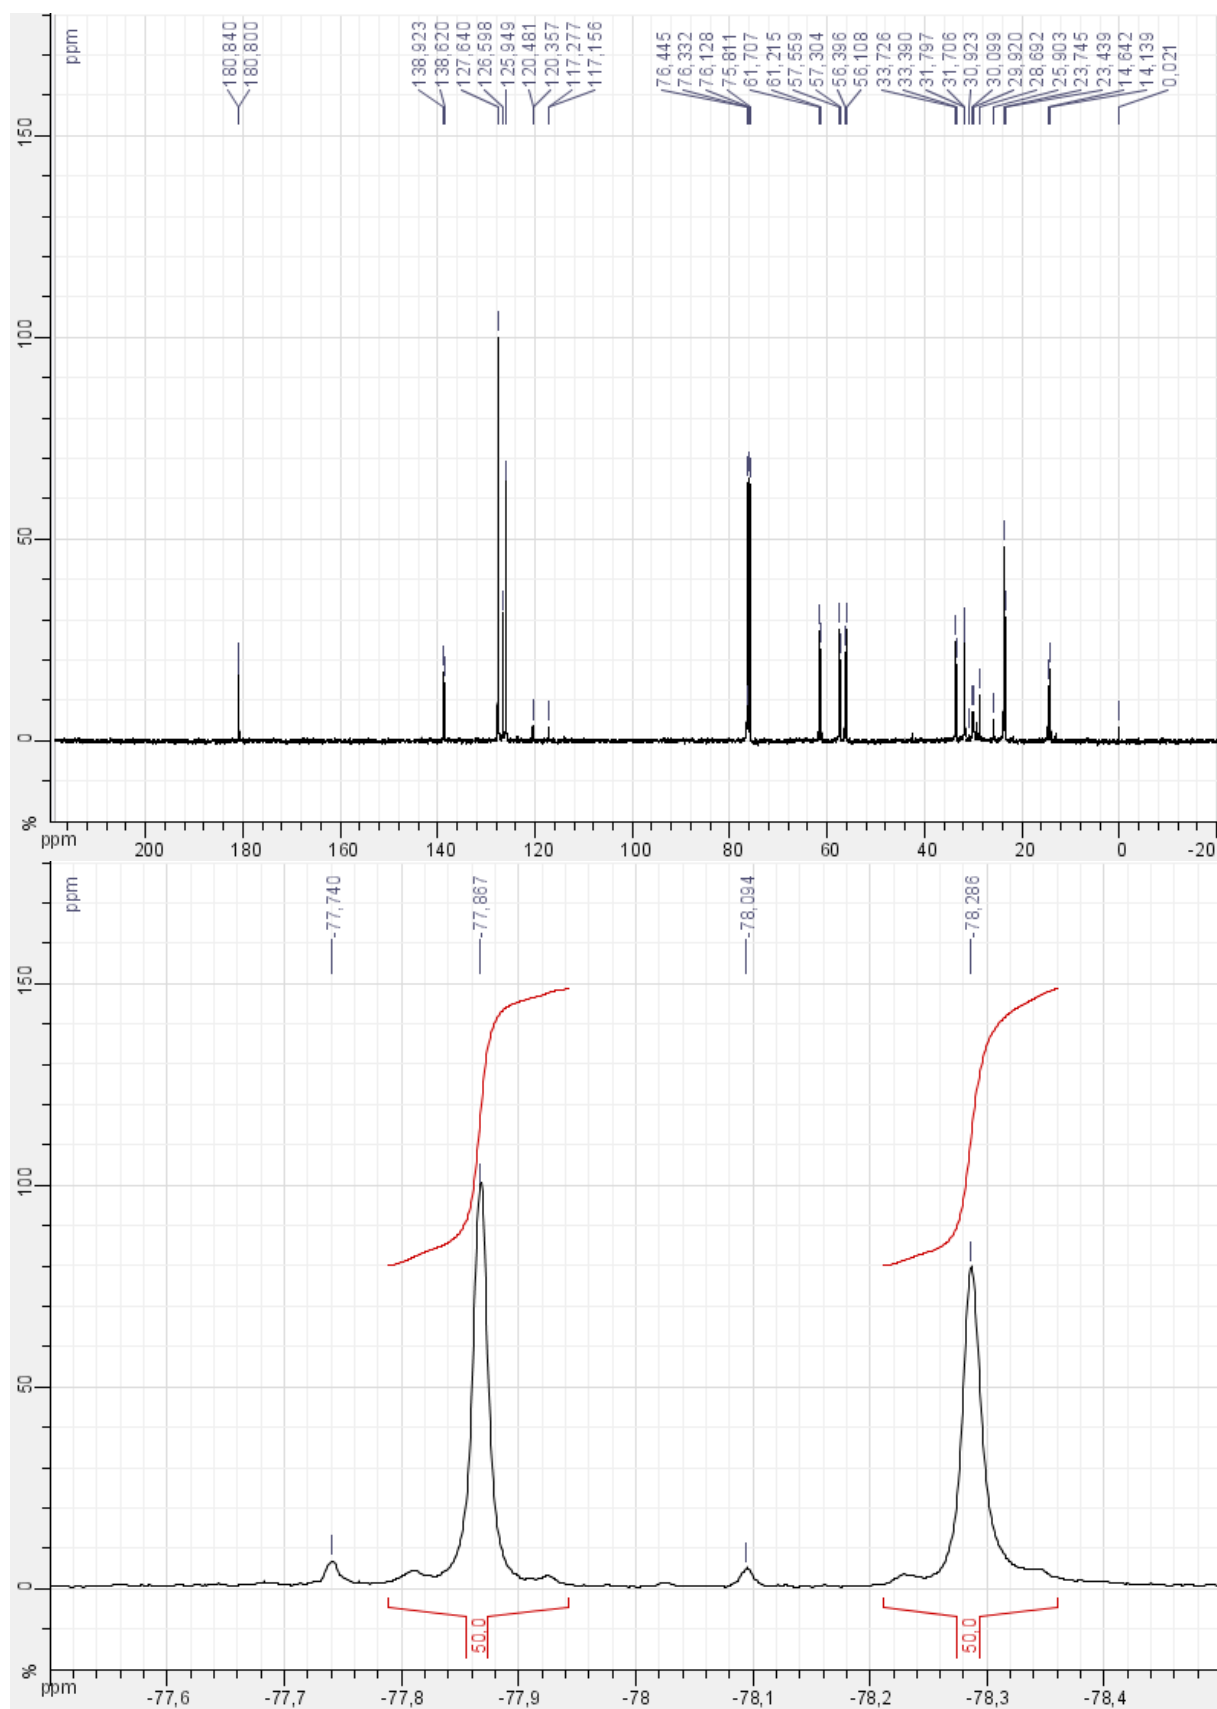



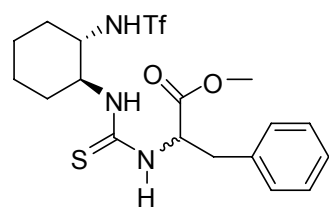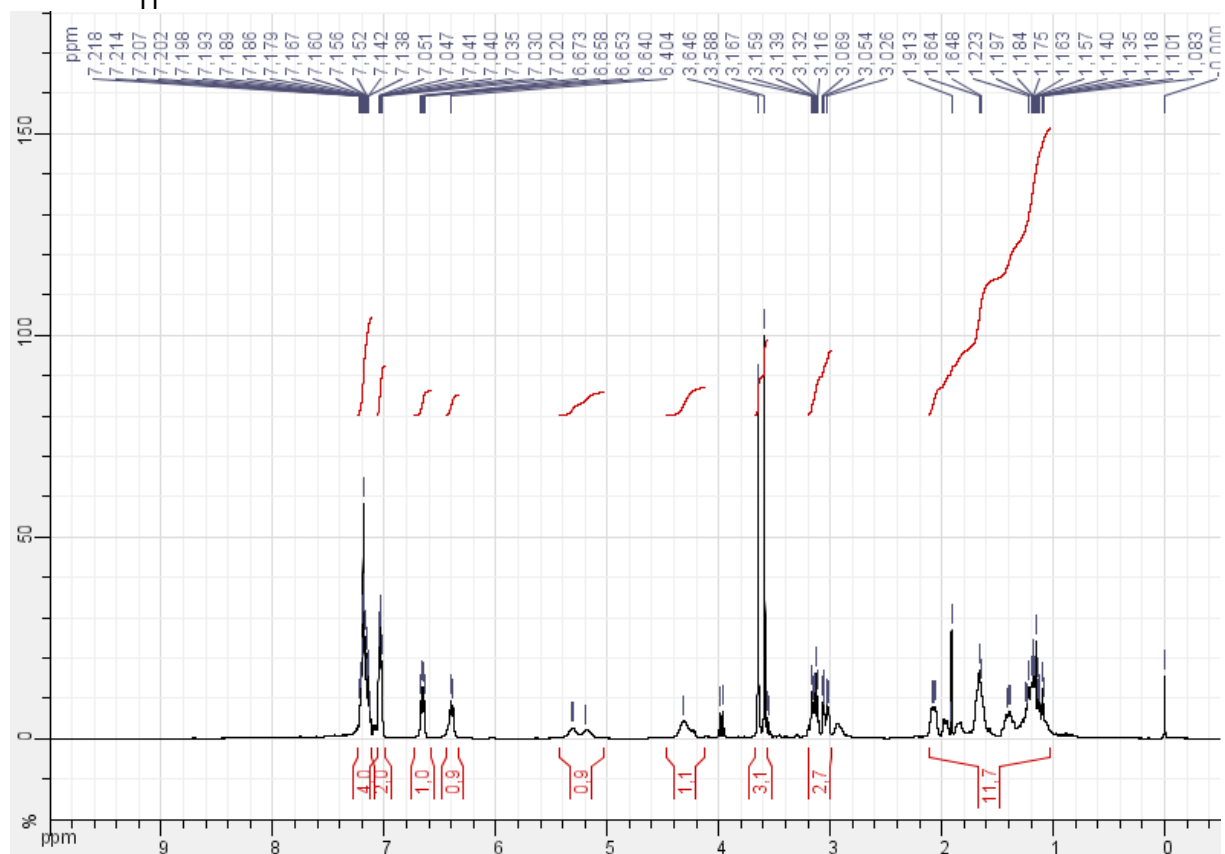

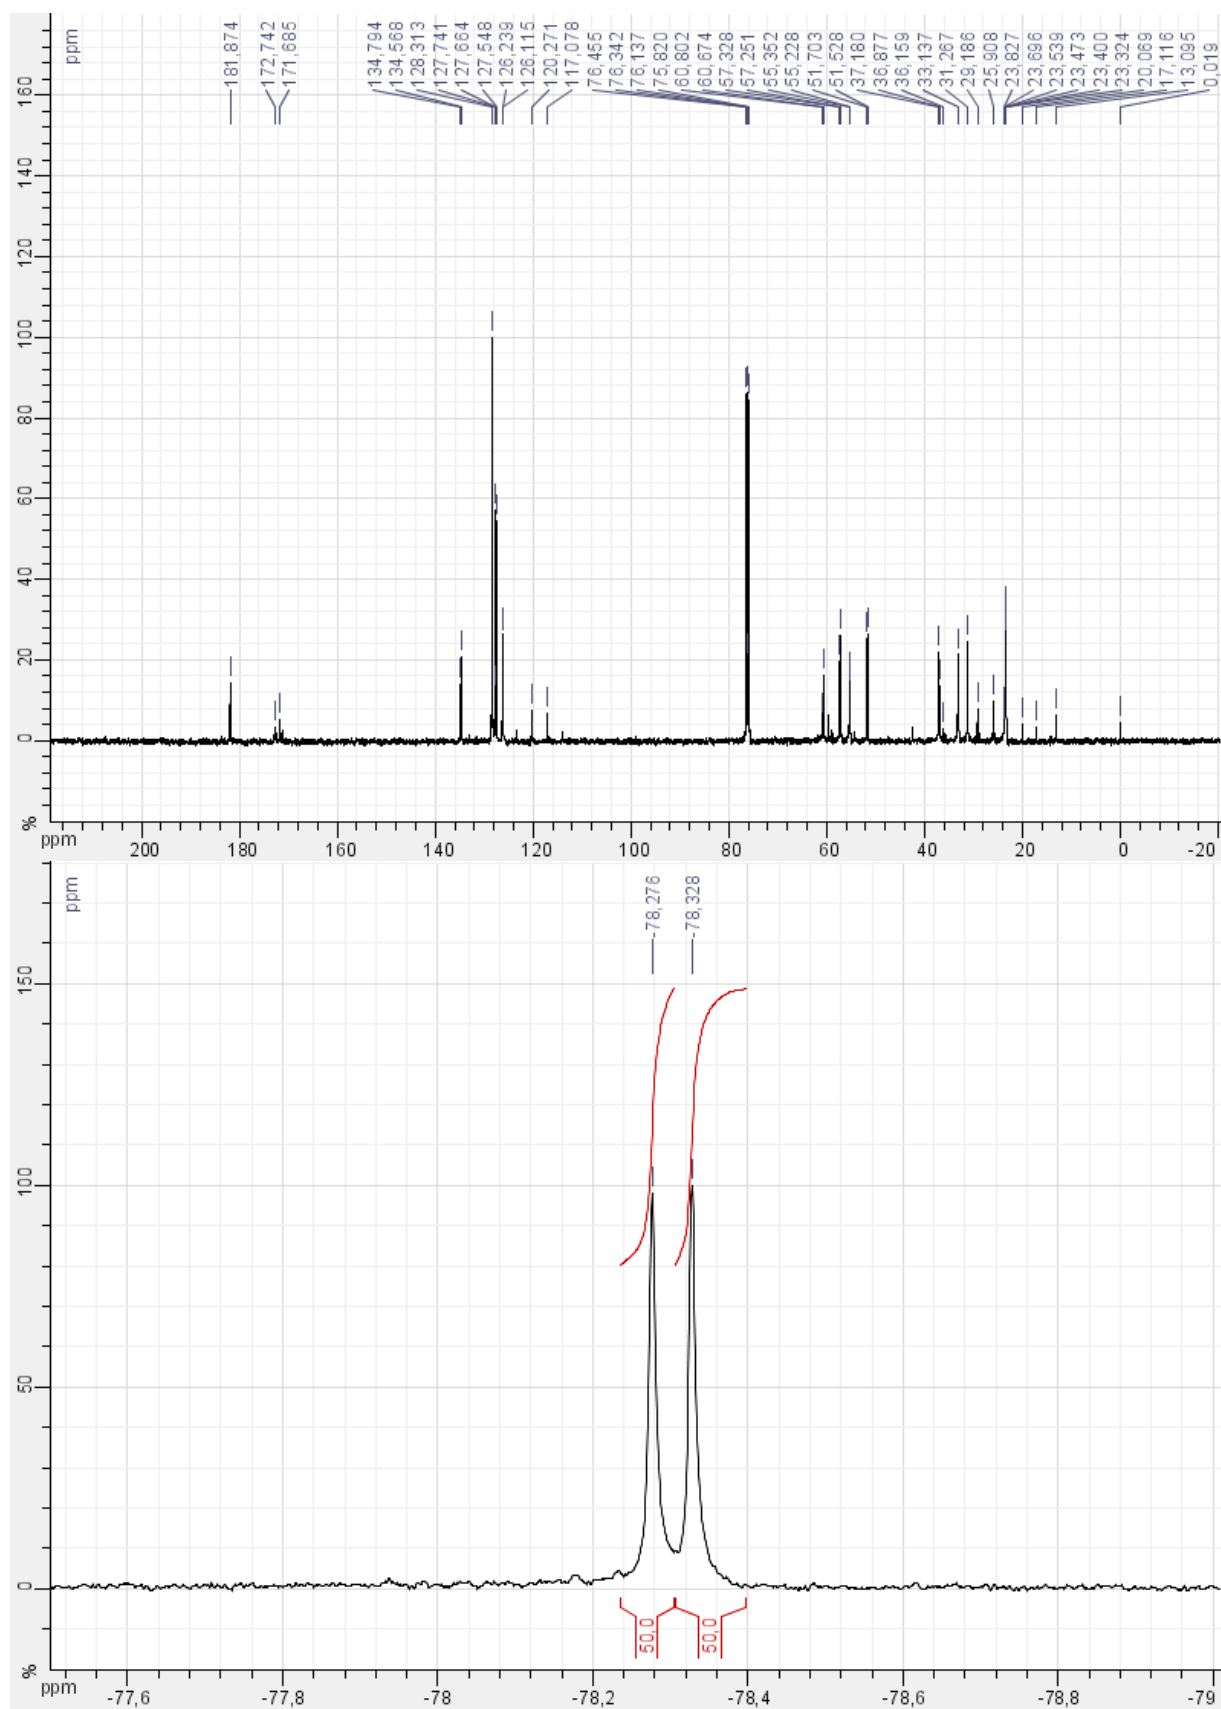

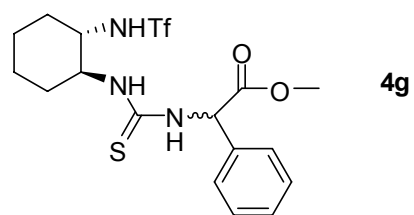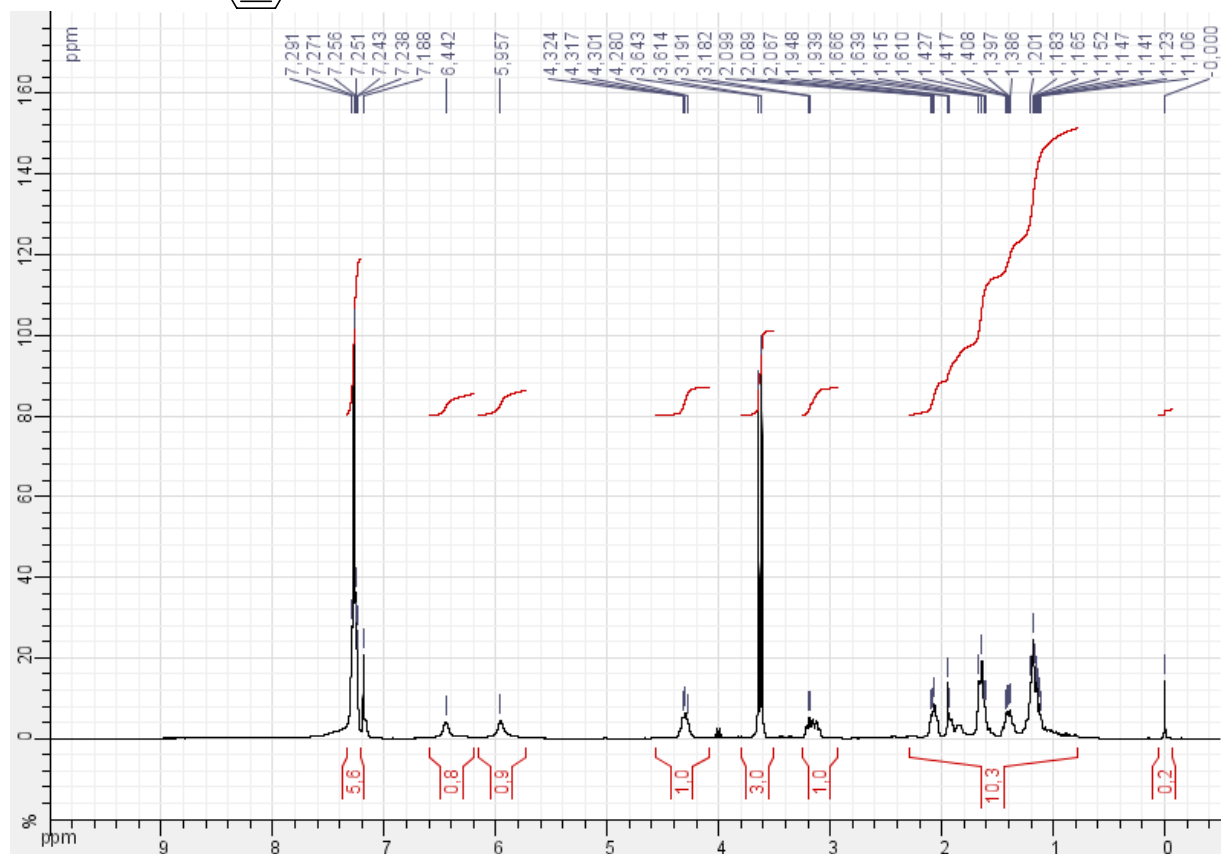

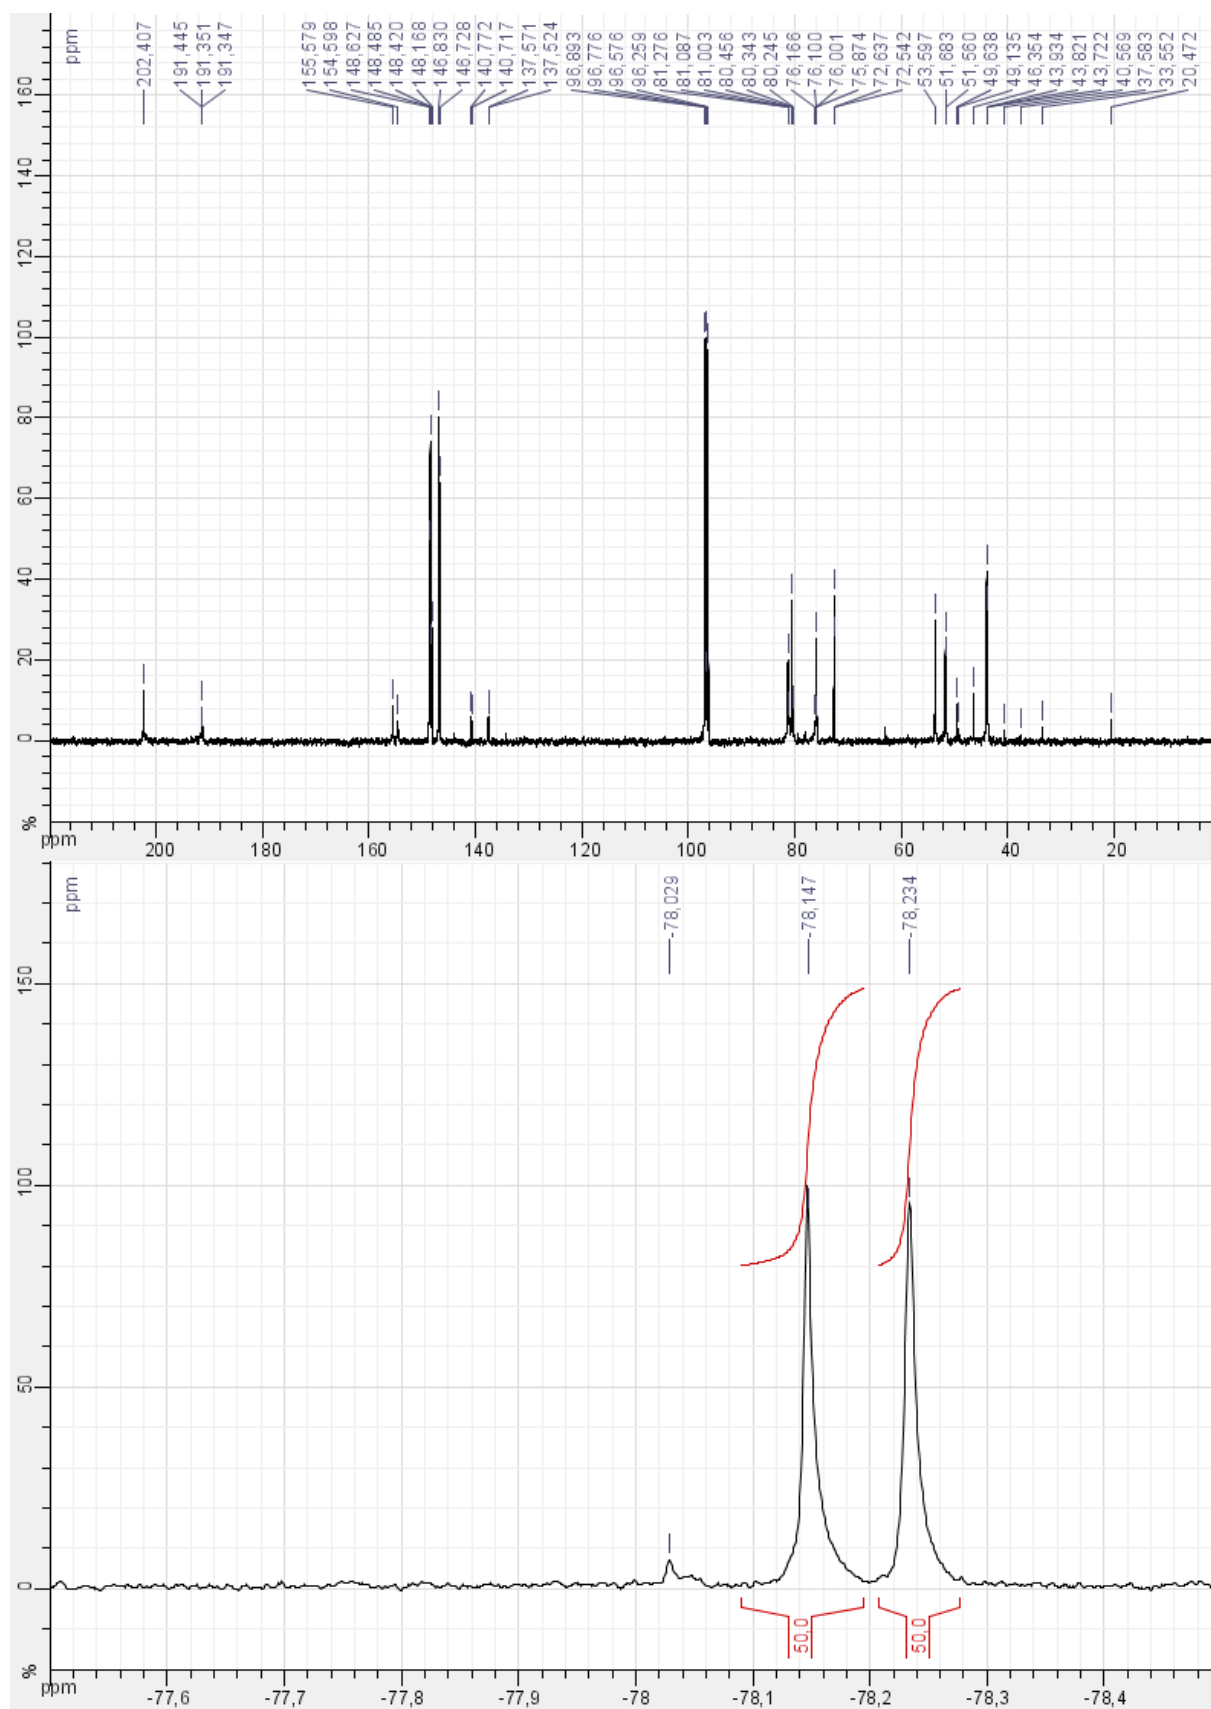

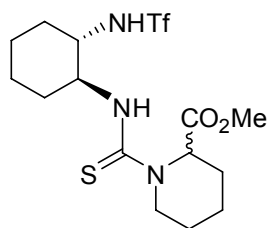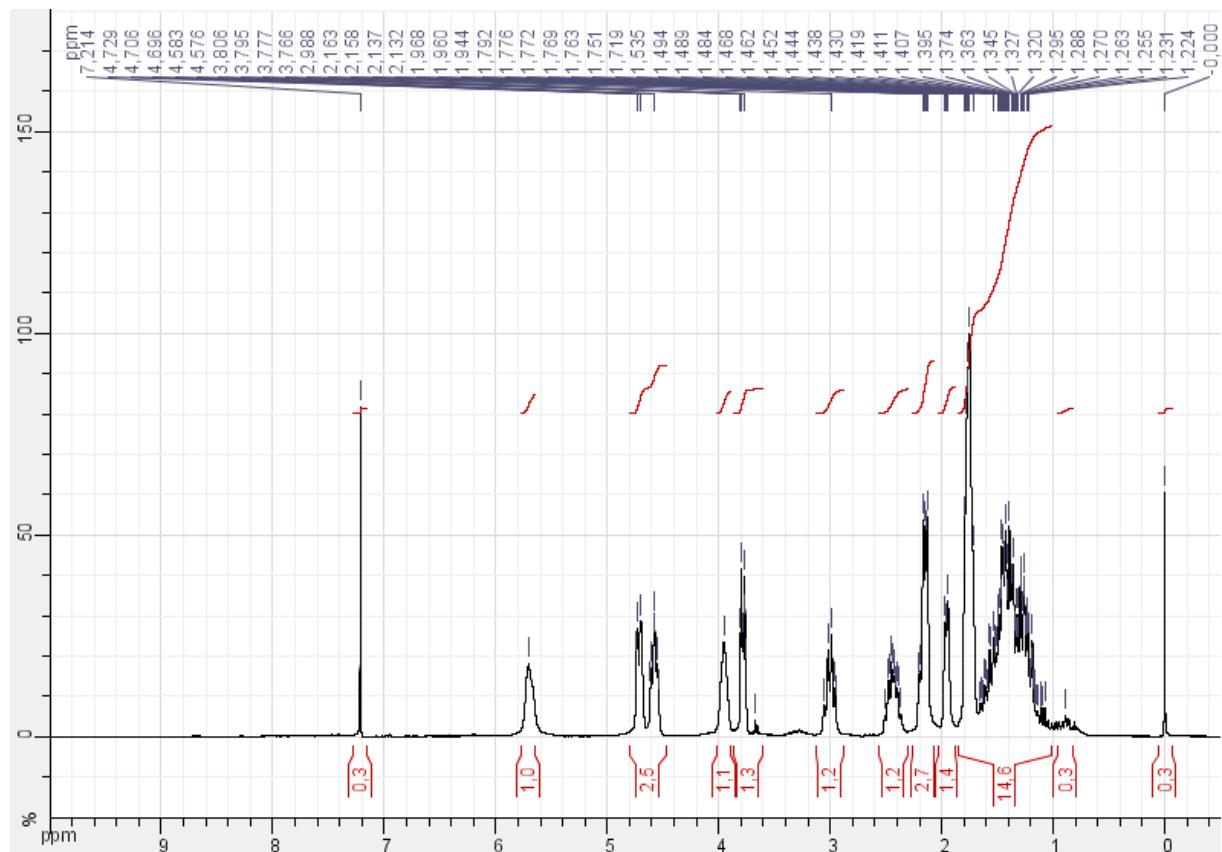

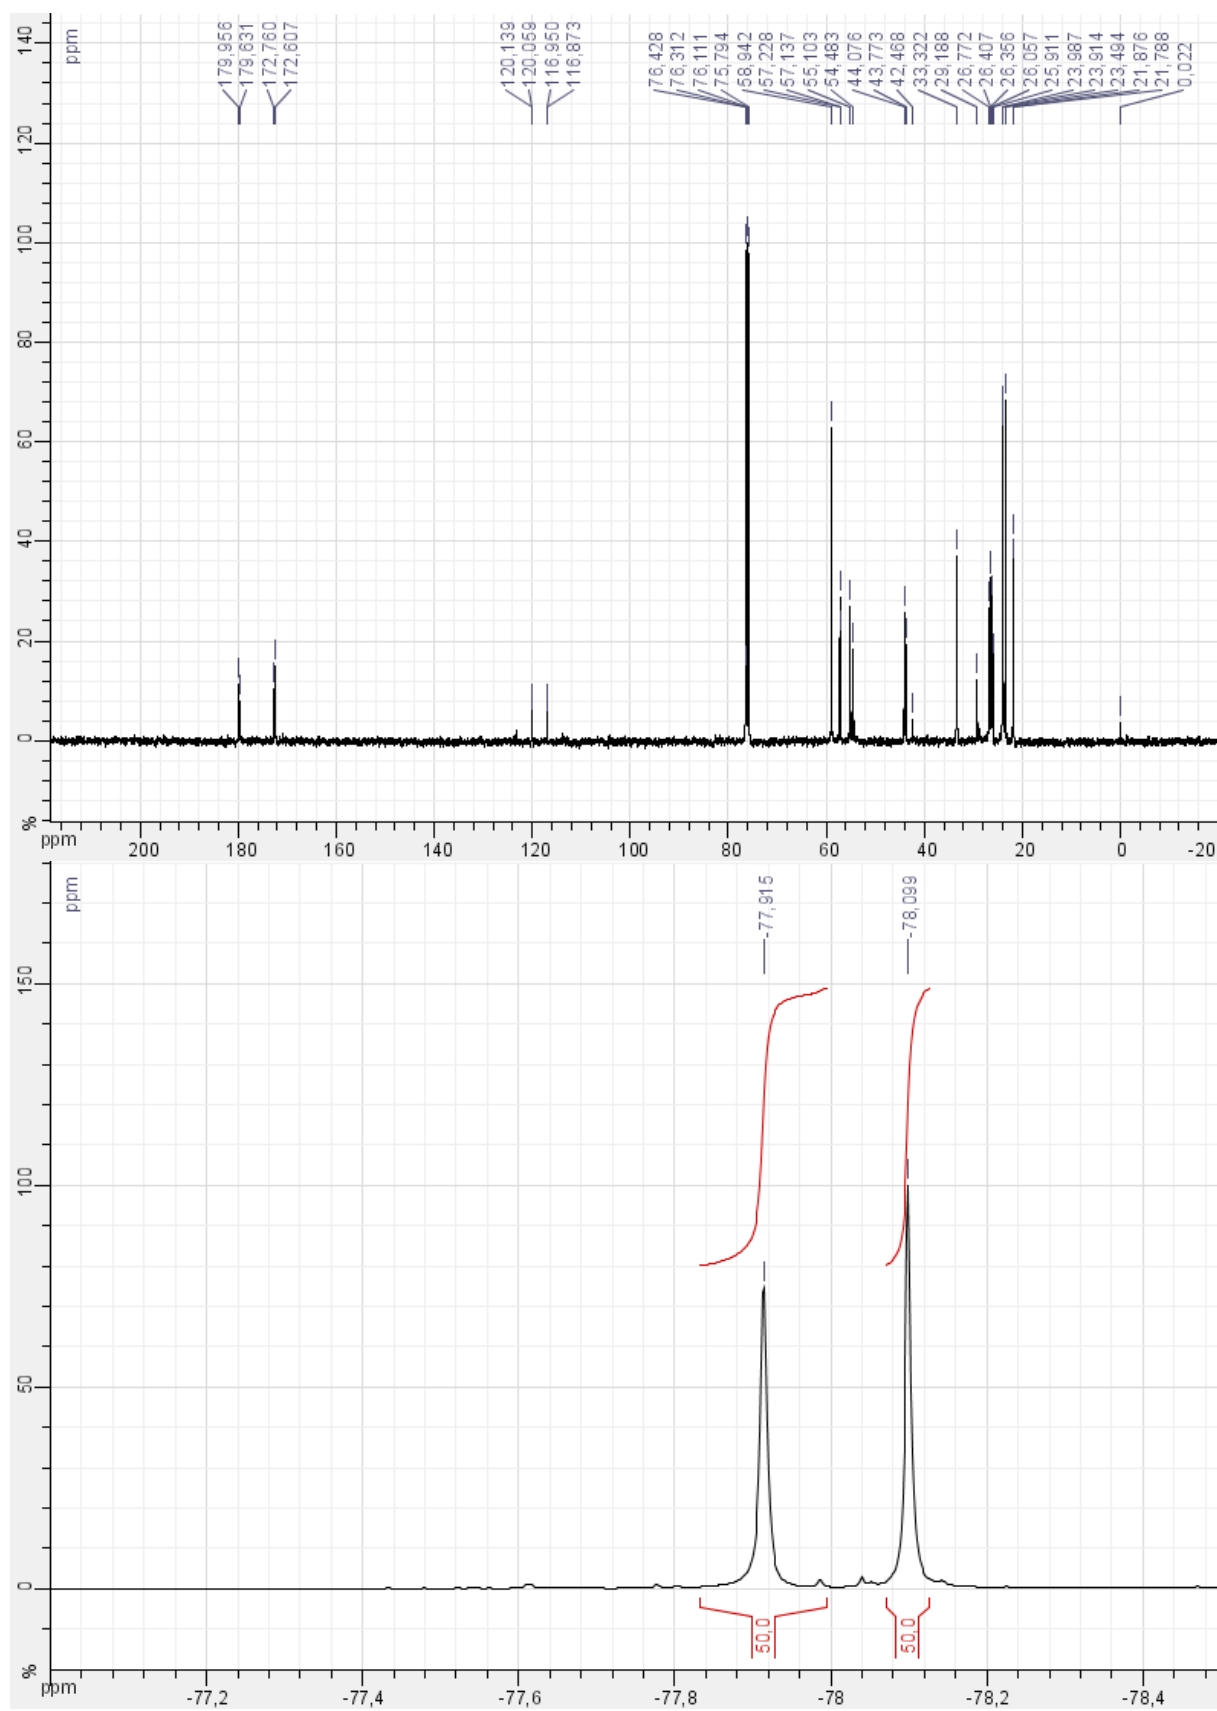

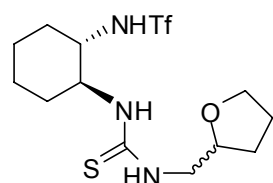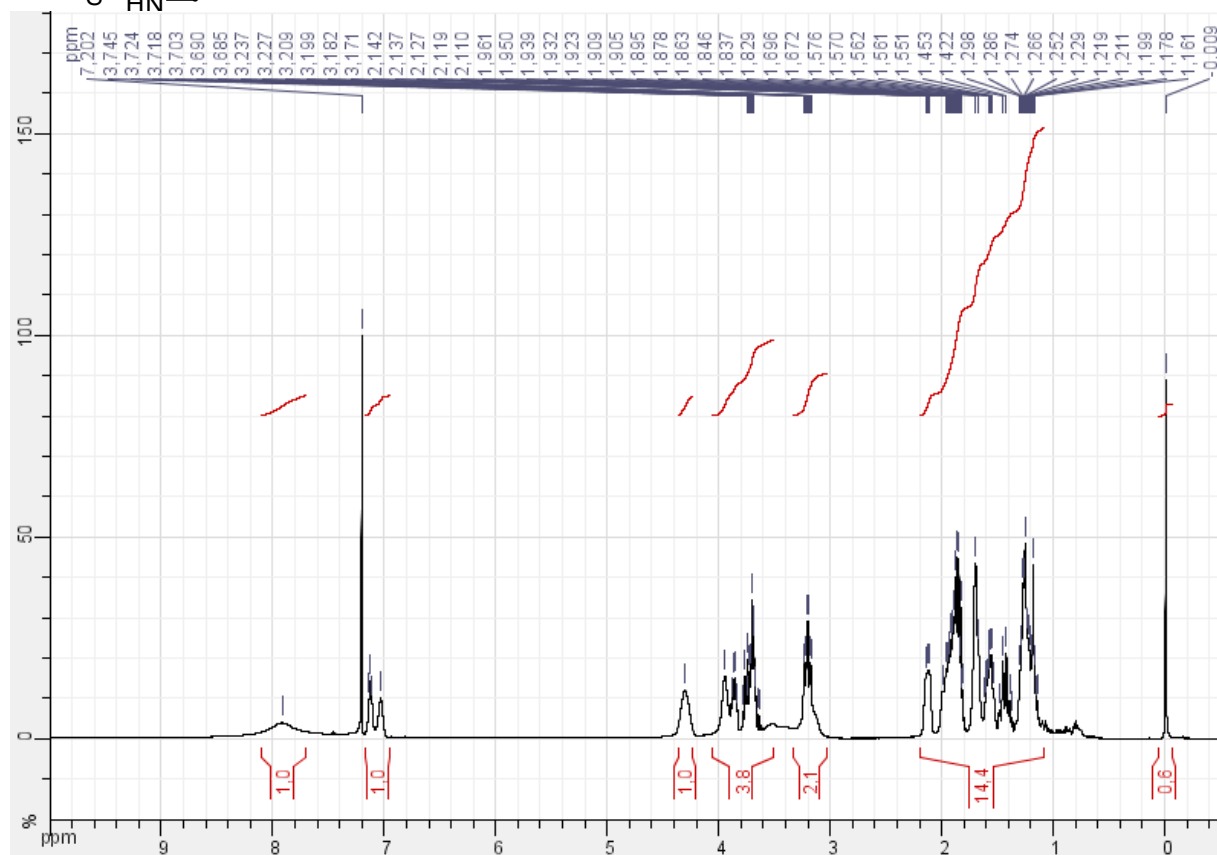

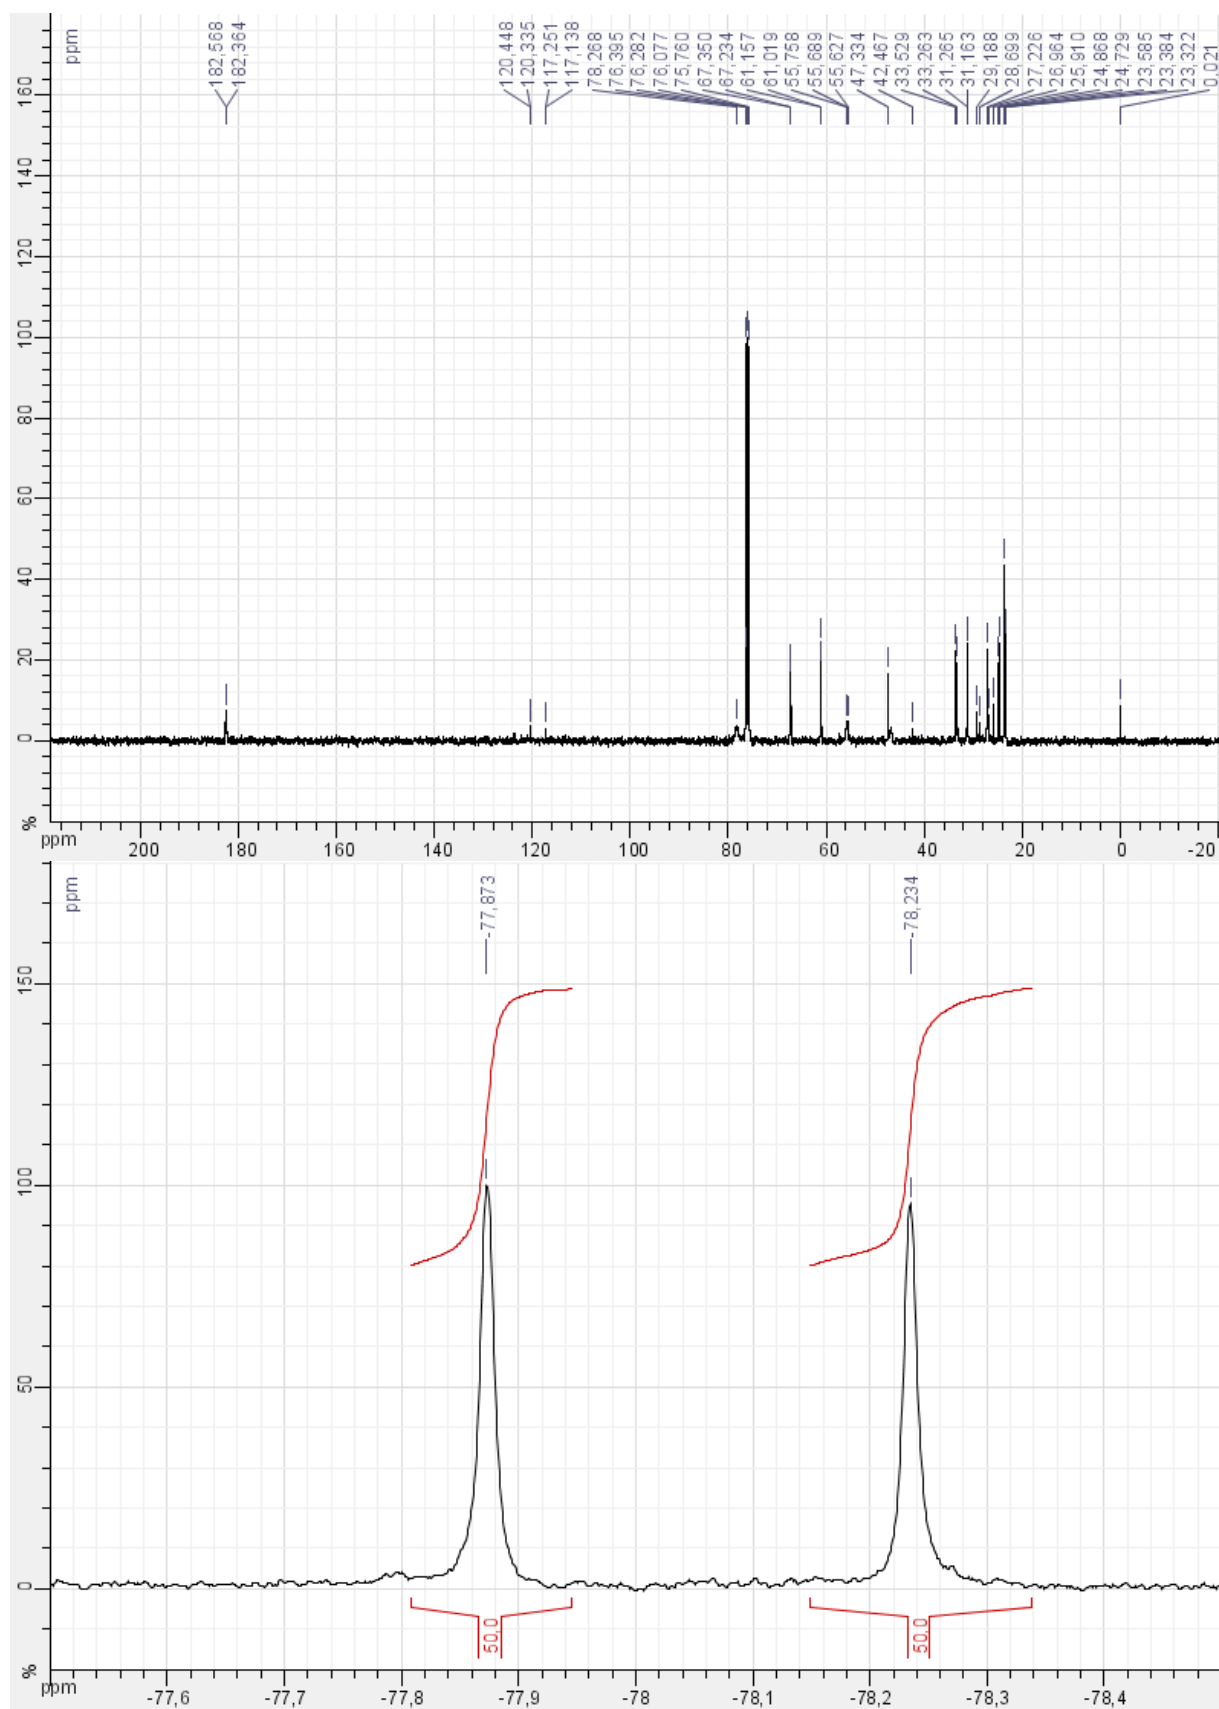



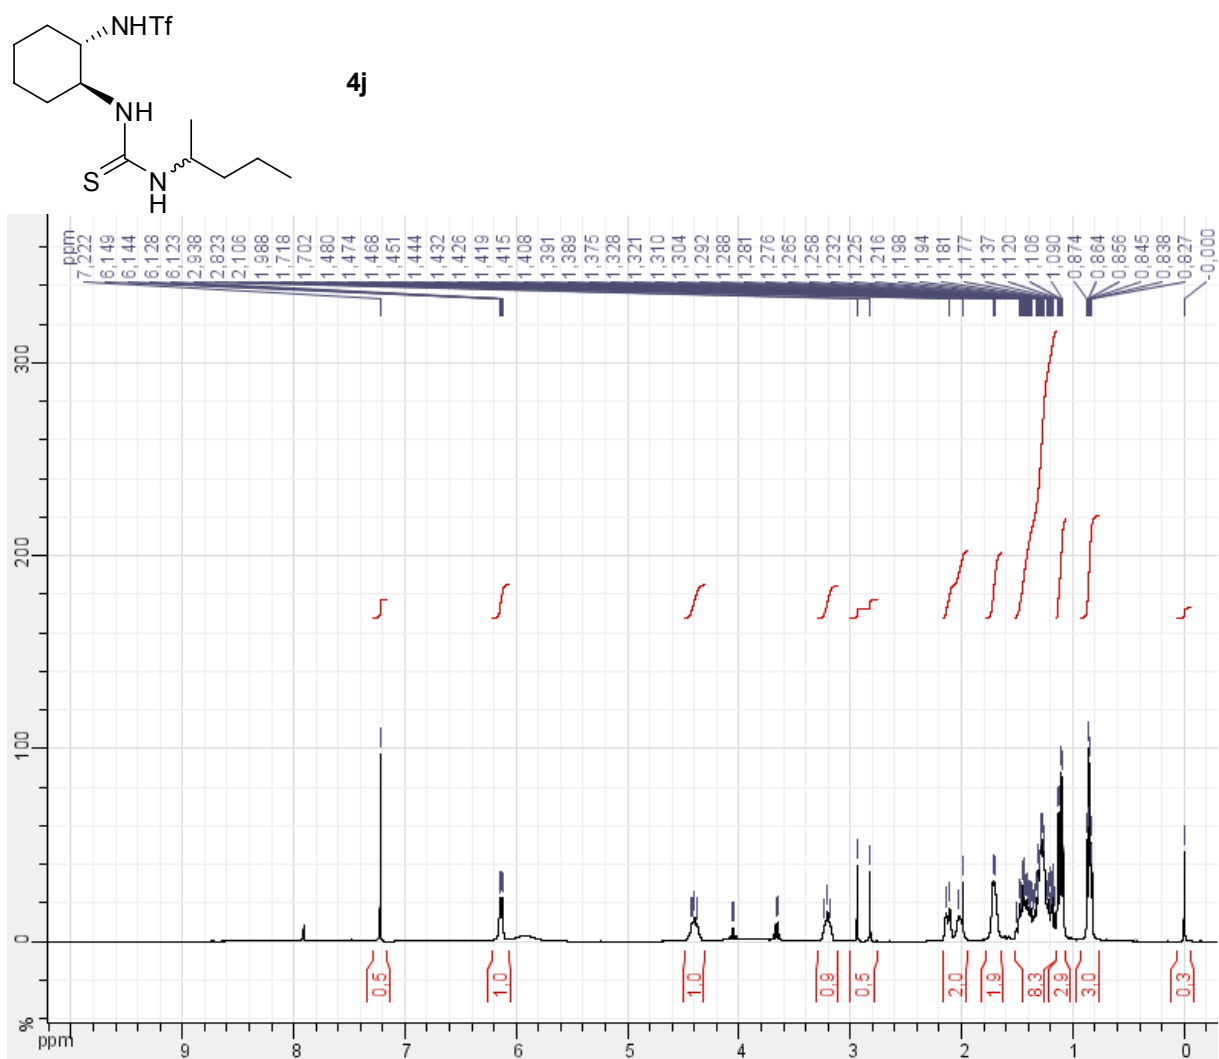

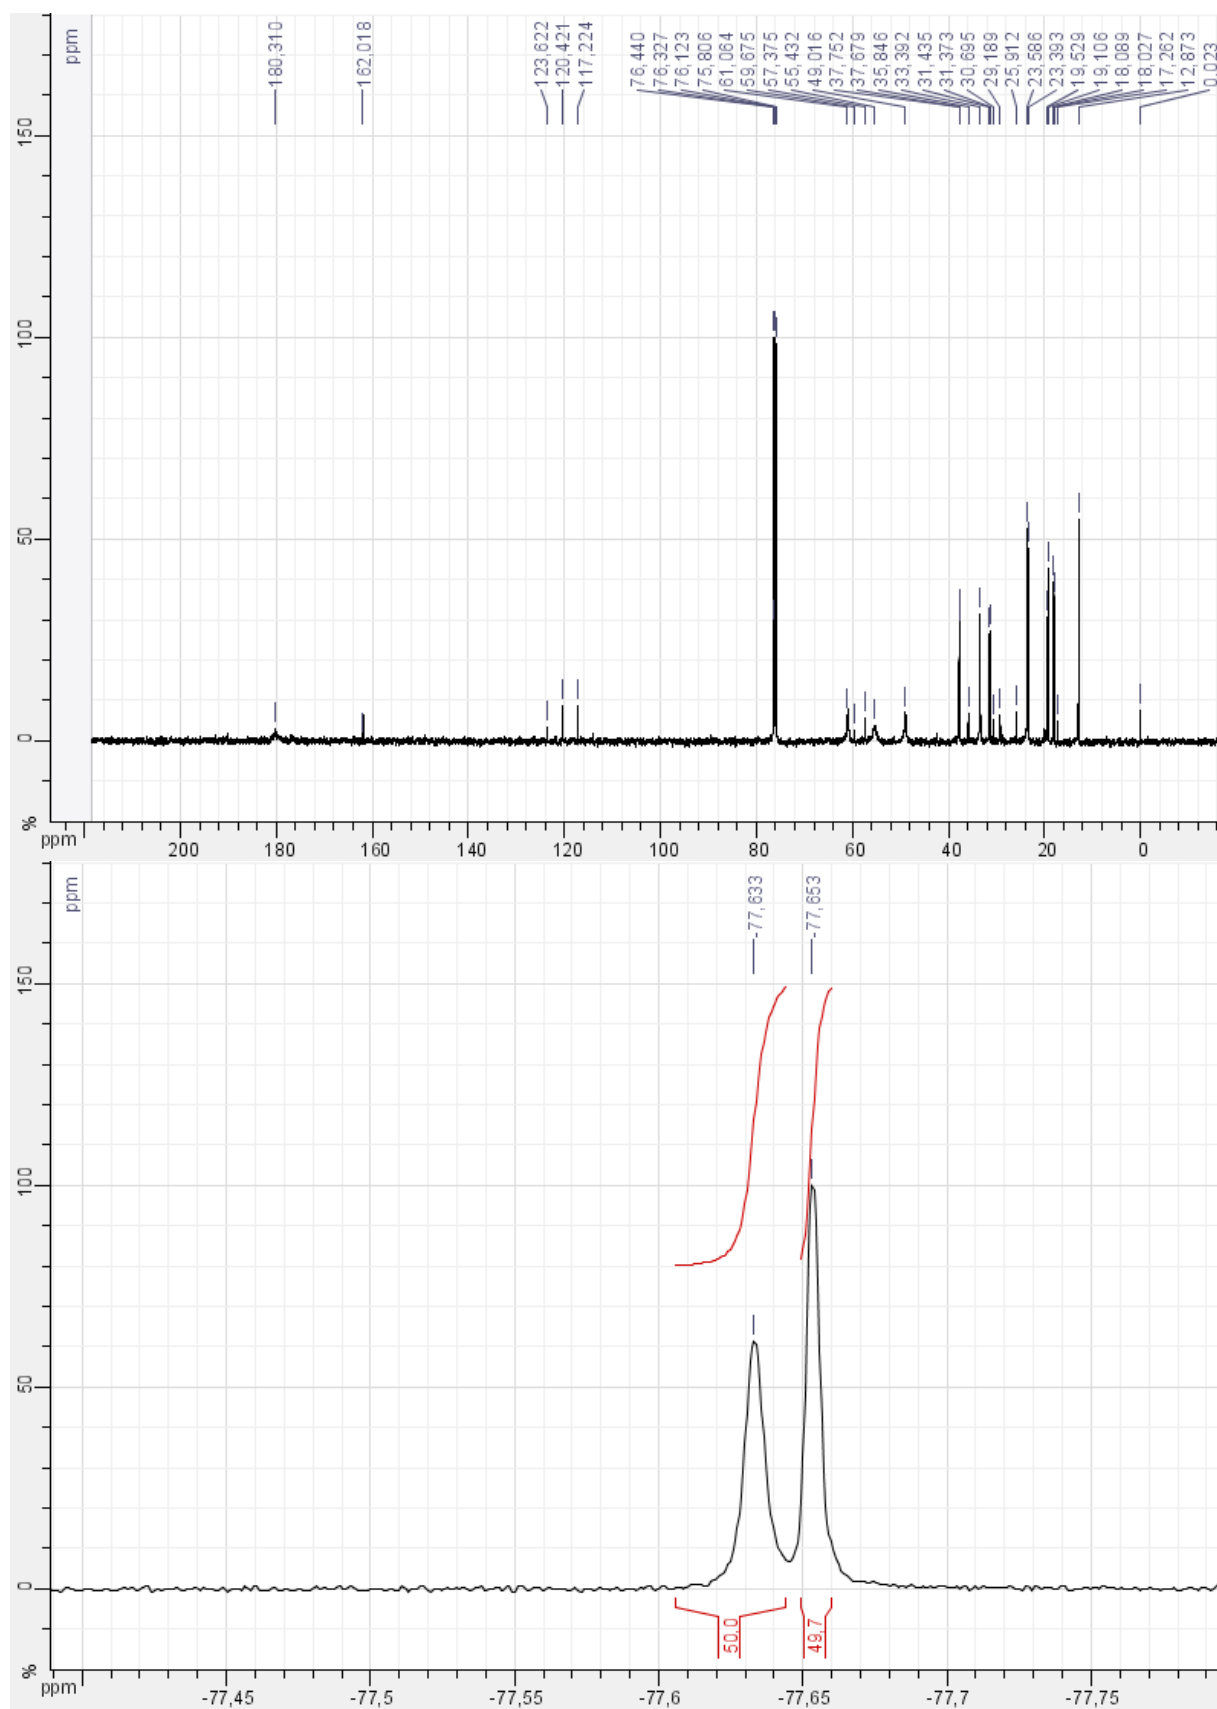

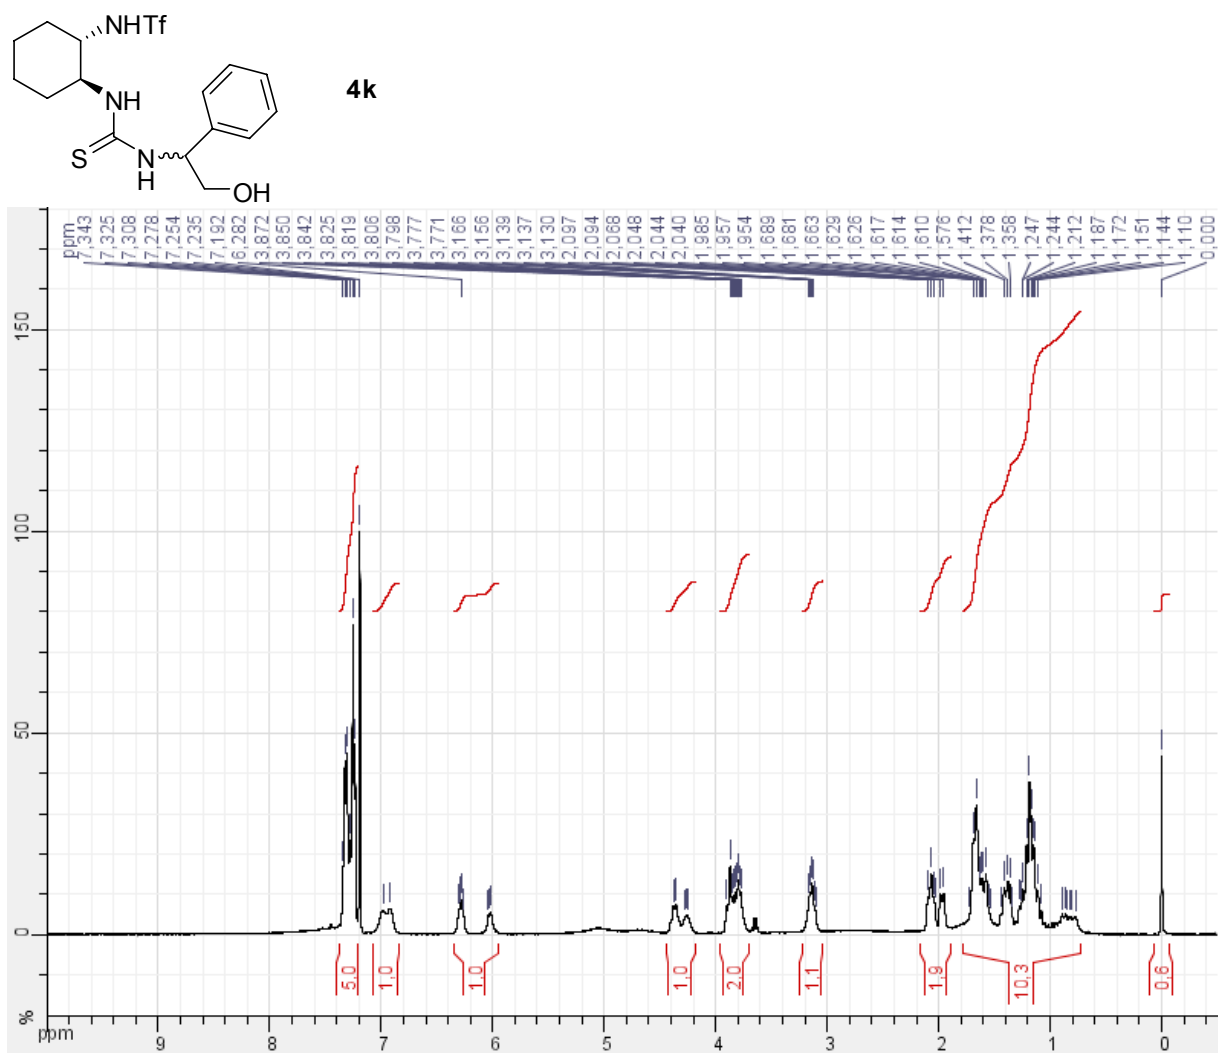

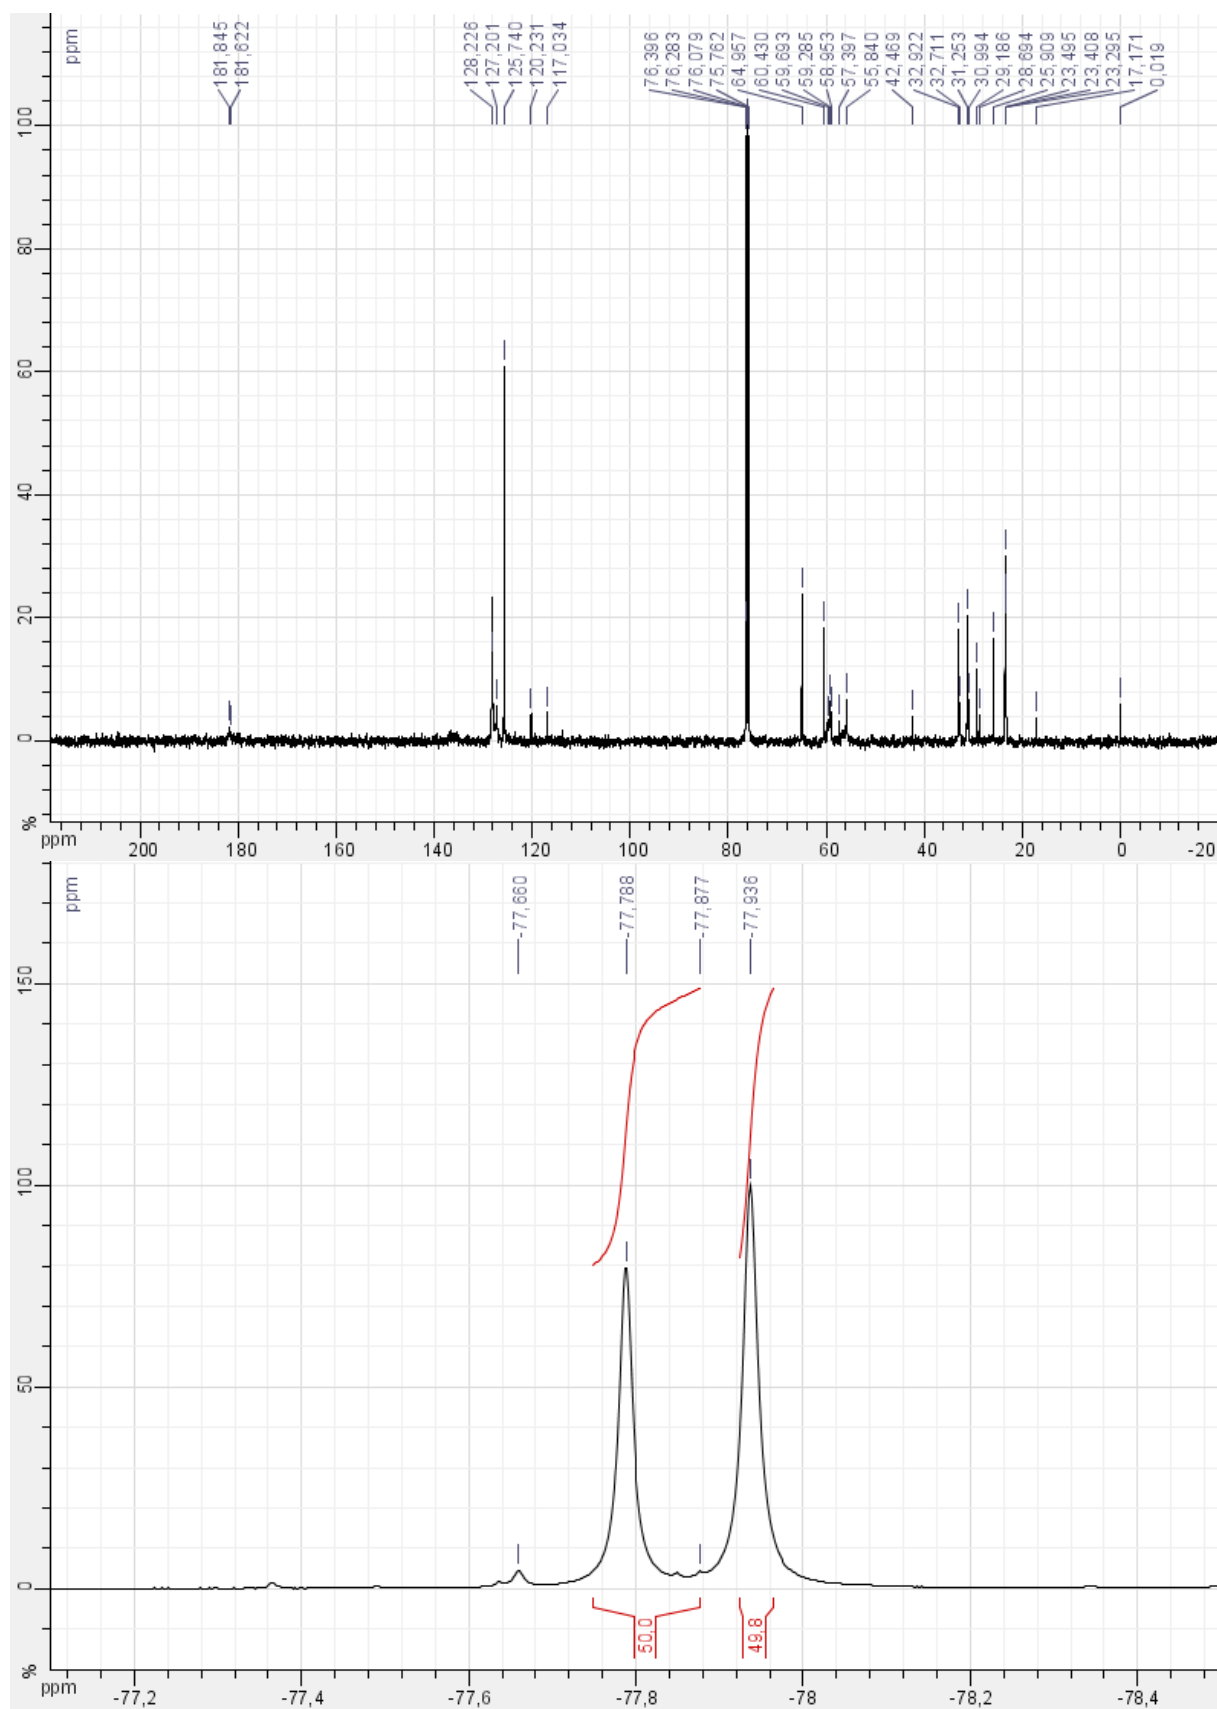

## VI. $^1\text{H}$ , $^{13}\text{C}$ and $^{19}\text{F}$ NMR spectra of each diastereoisomer for selected thioureas

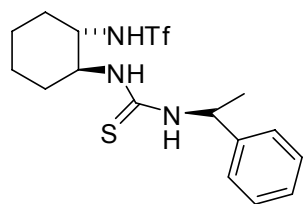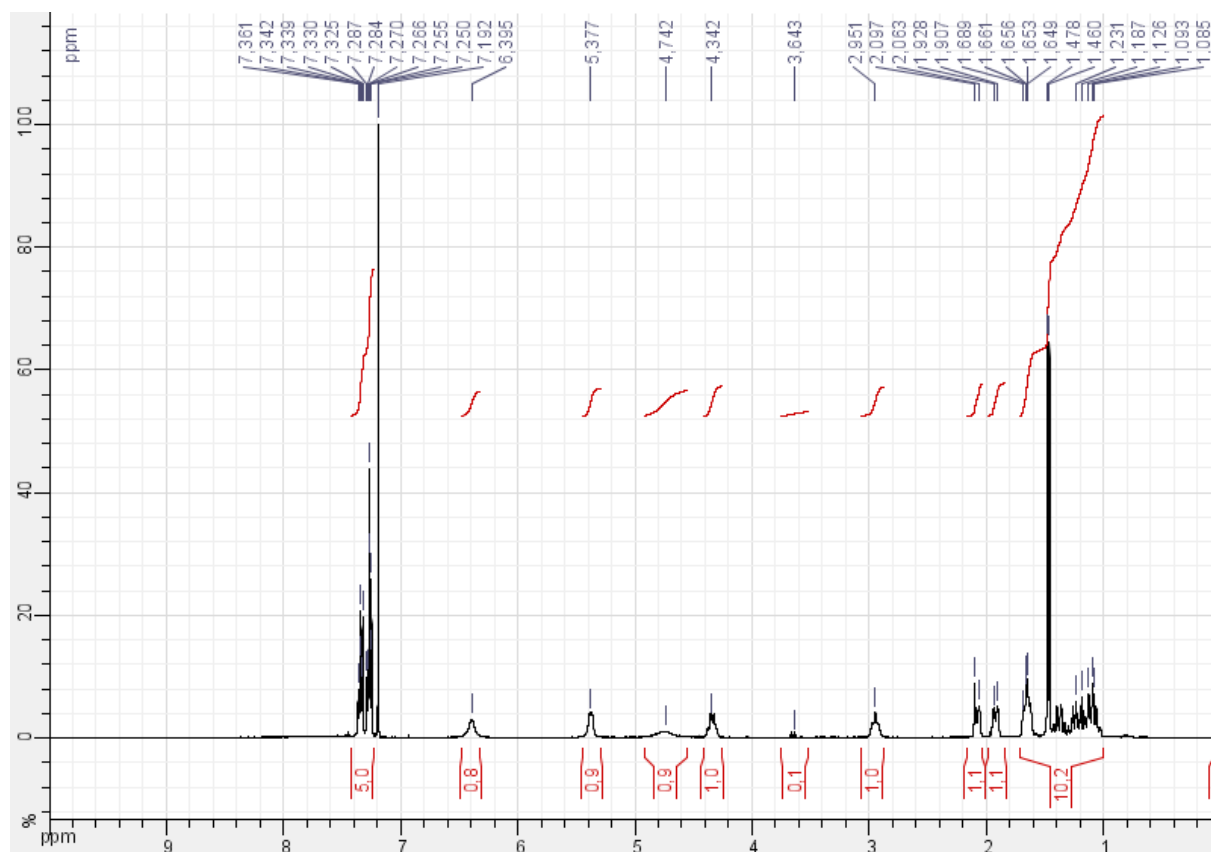

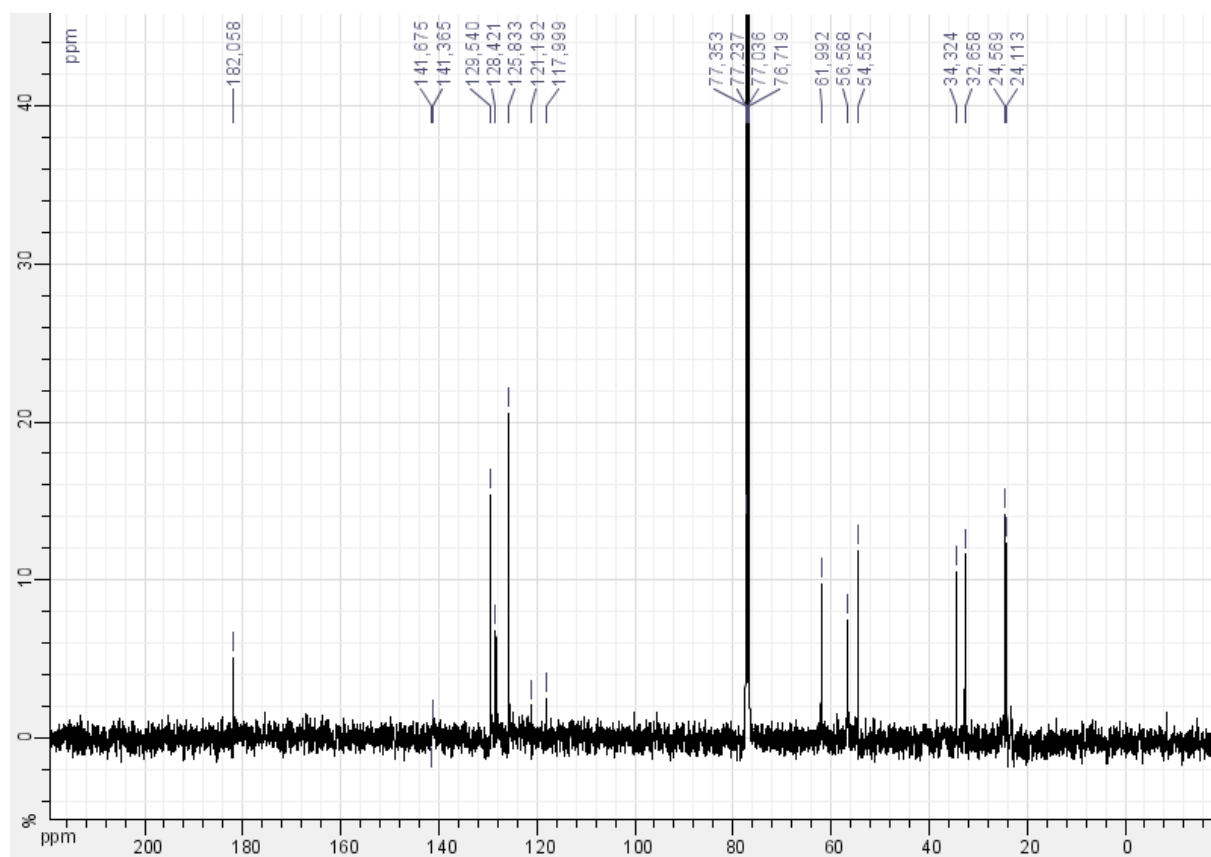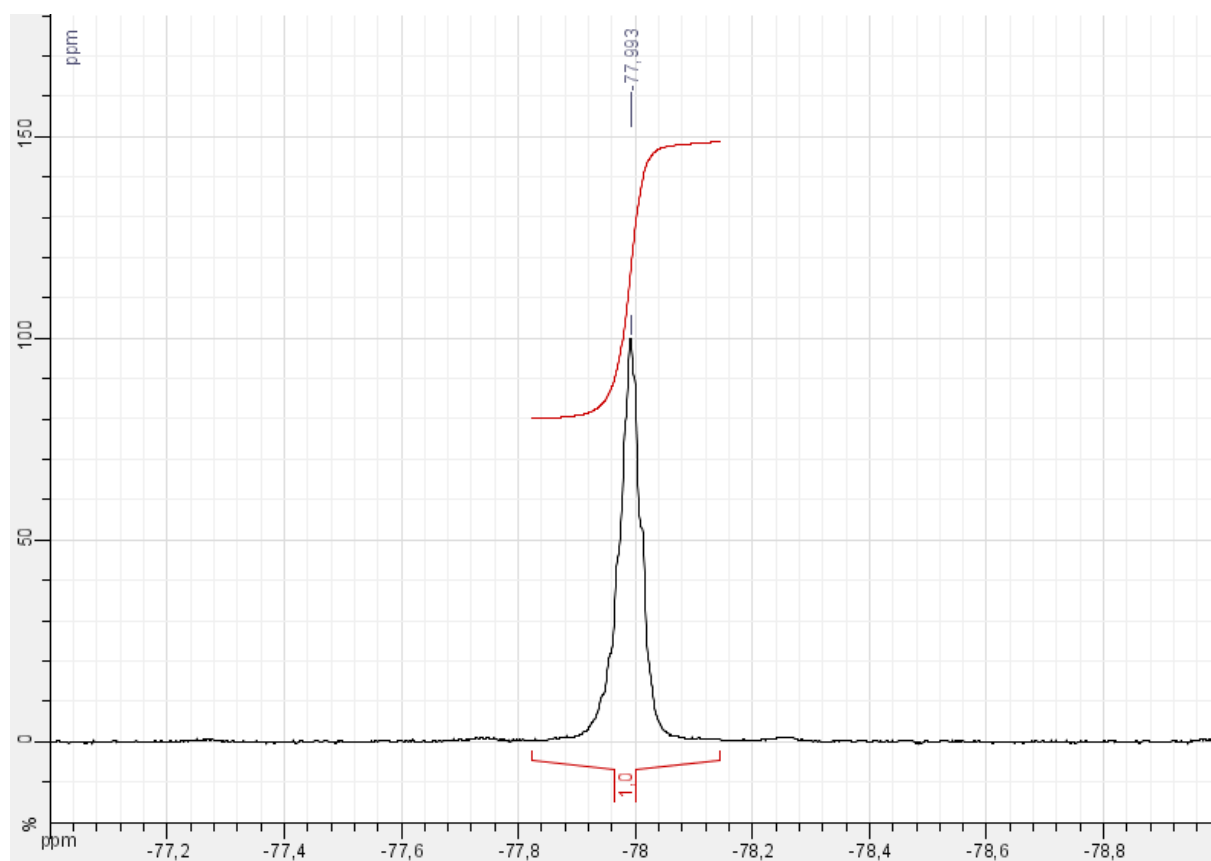

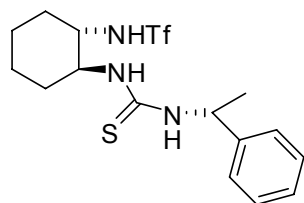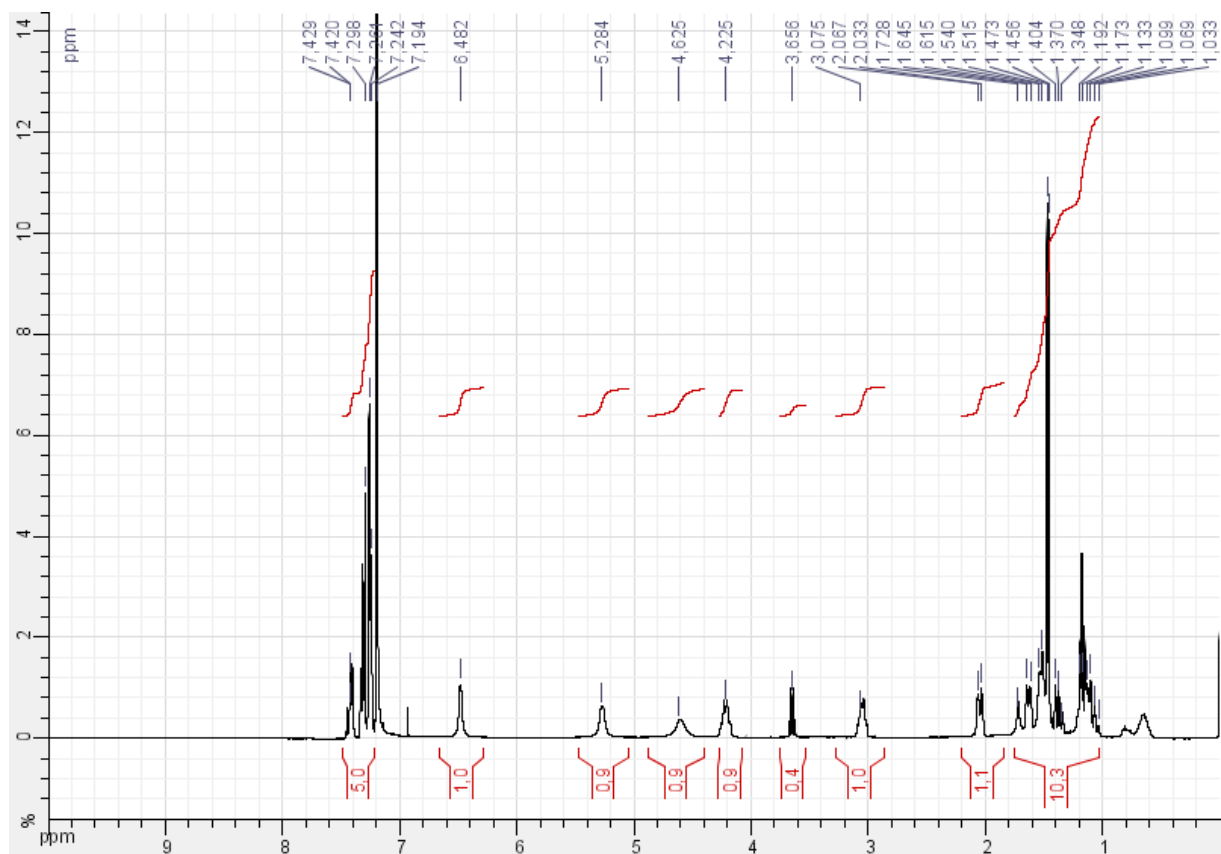

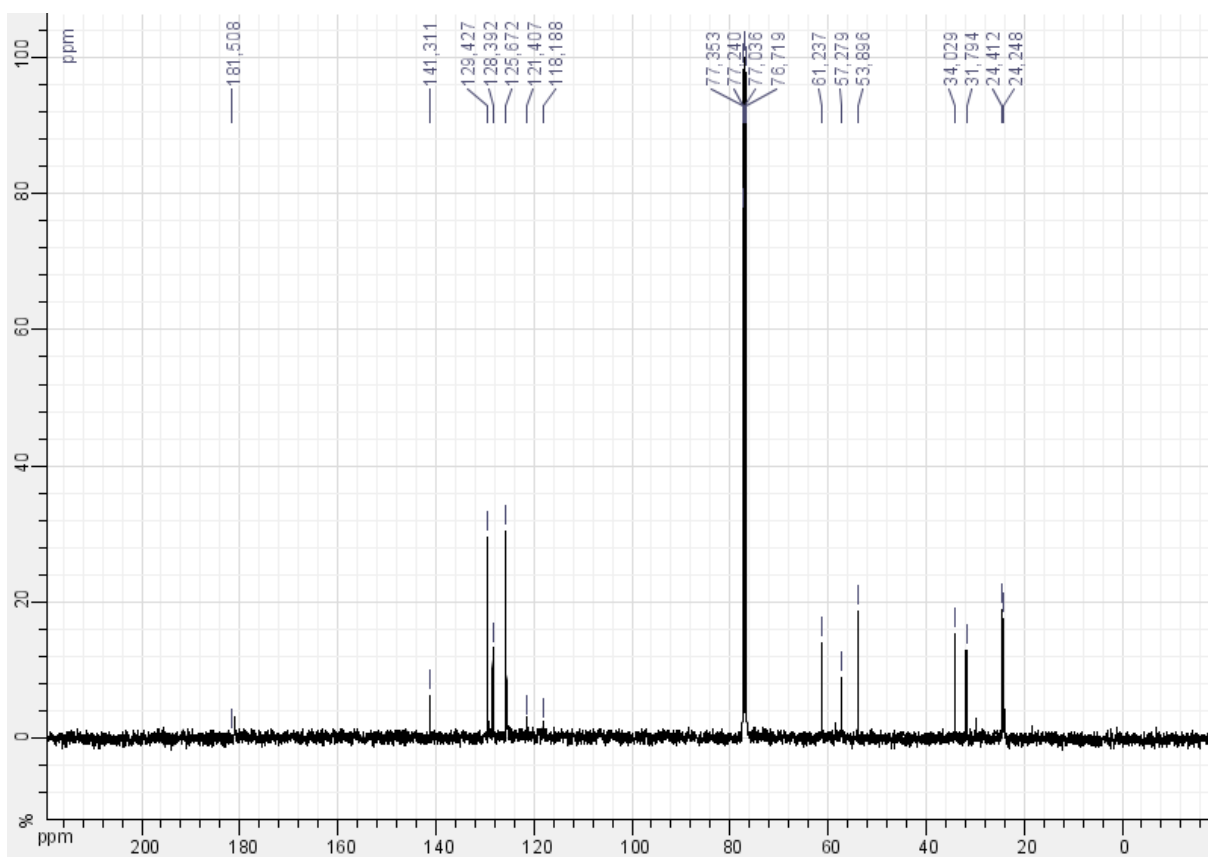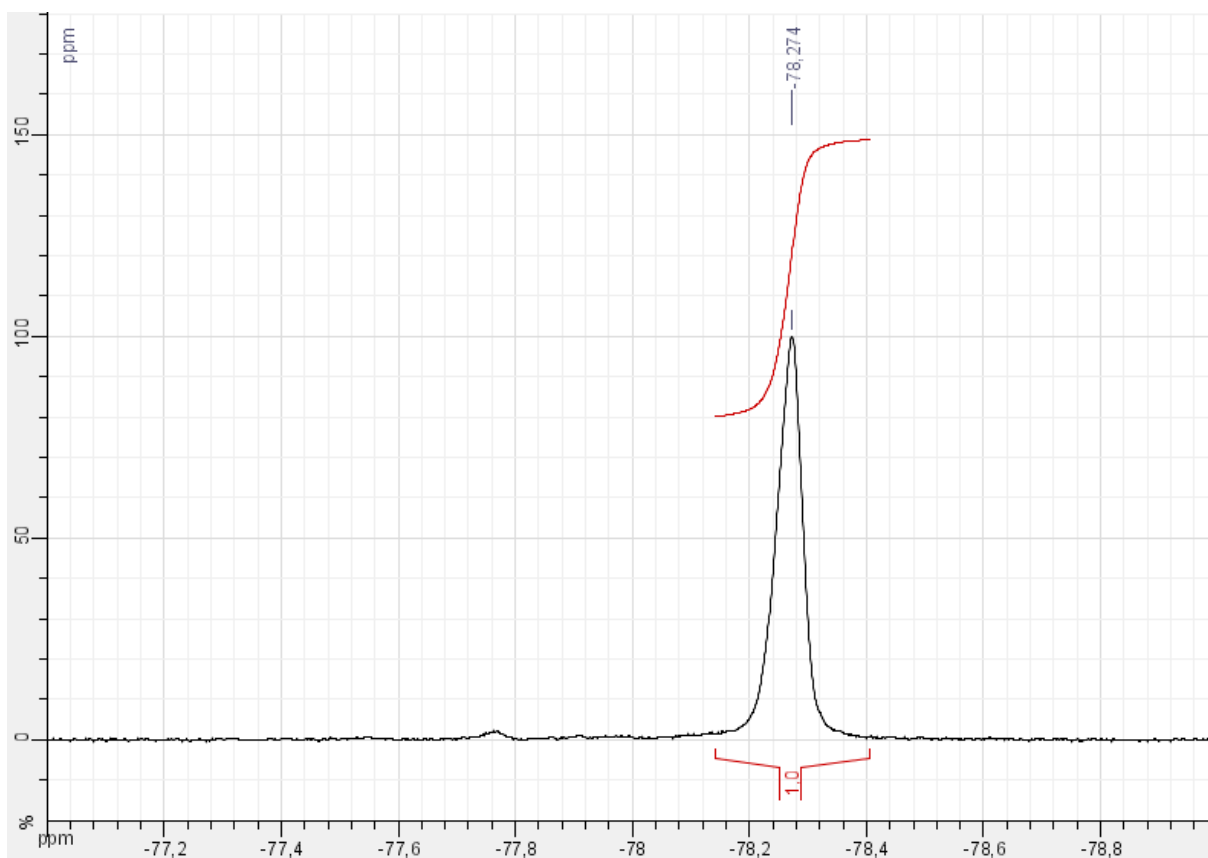



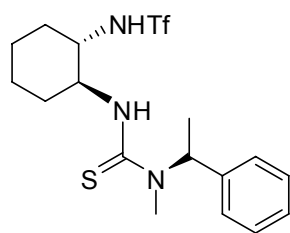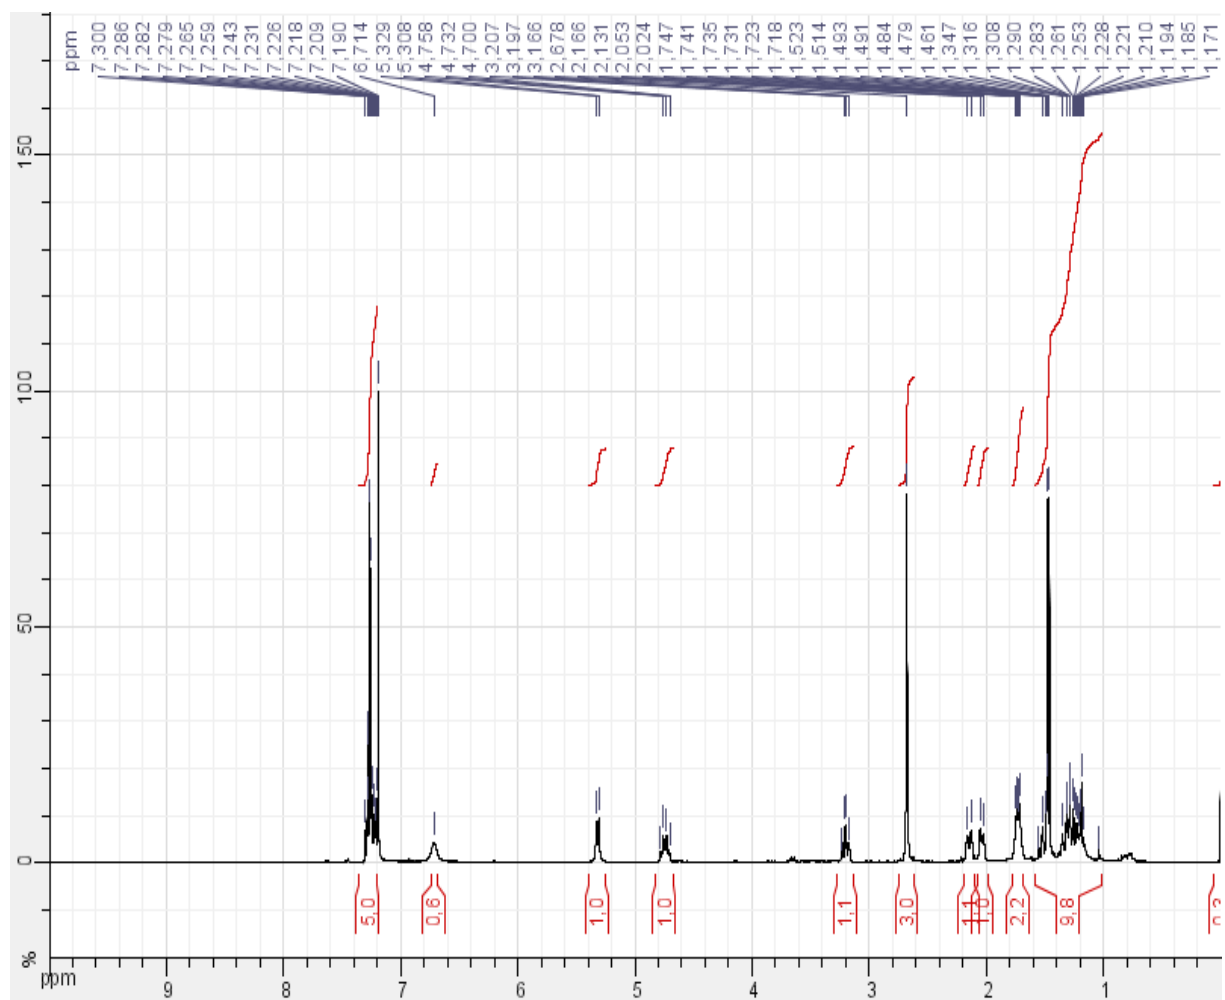

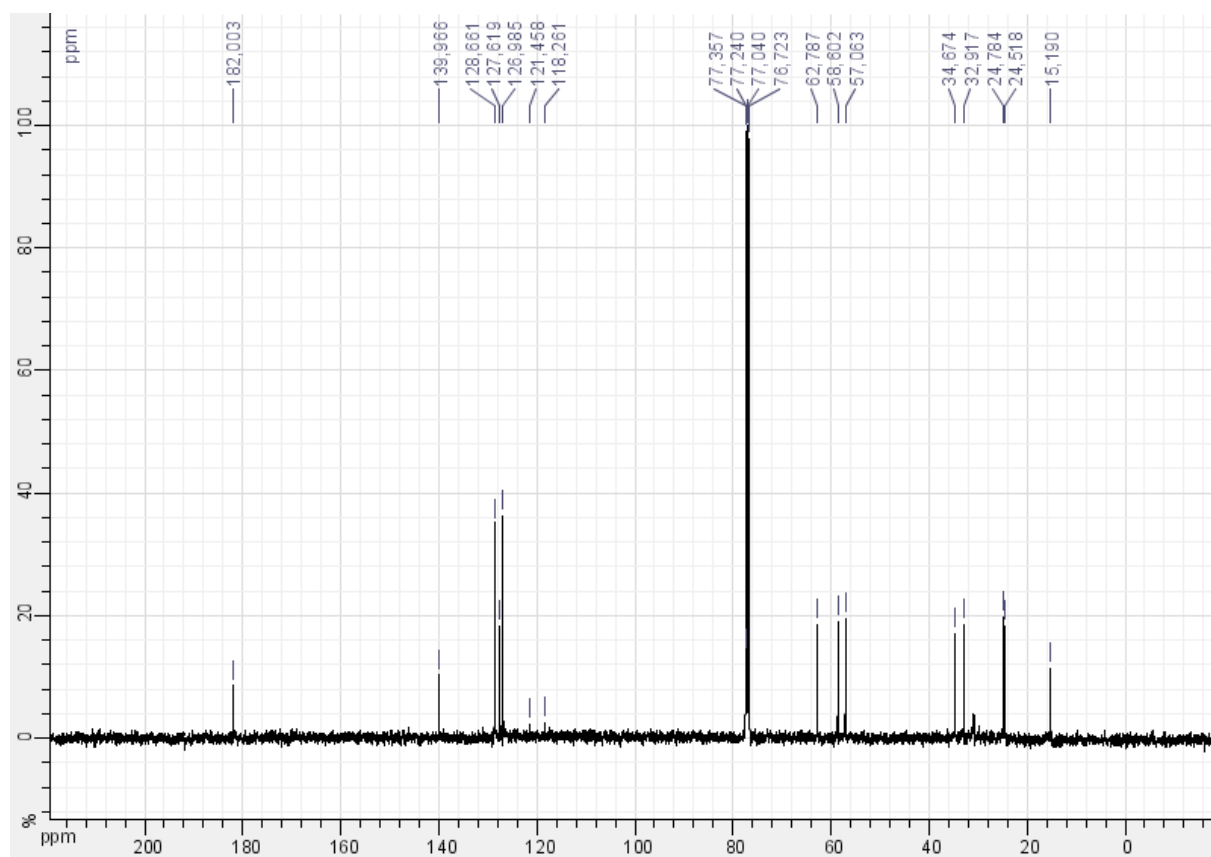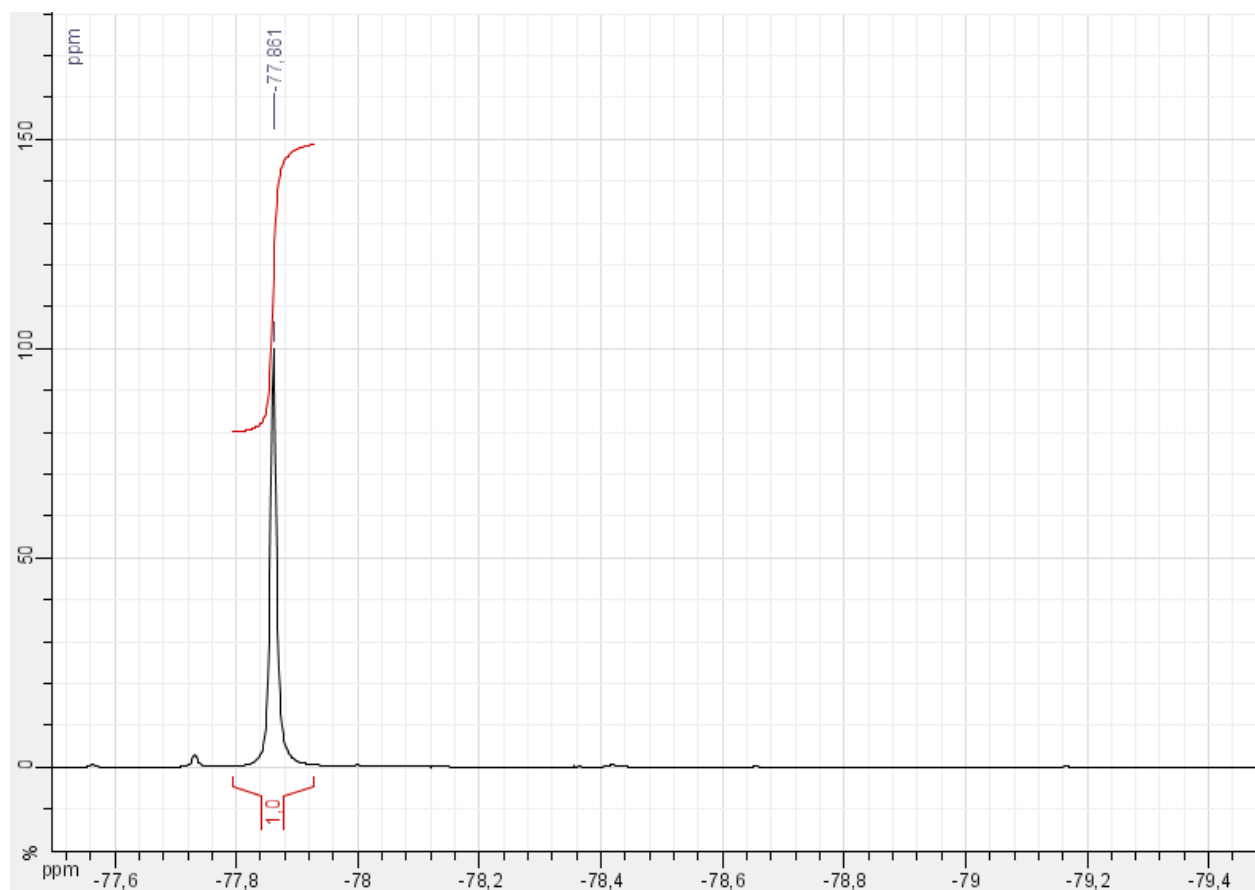

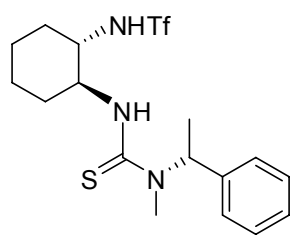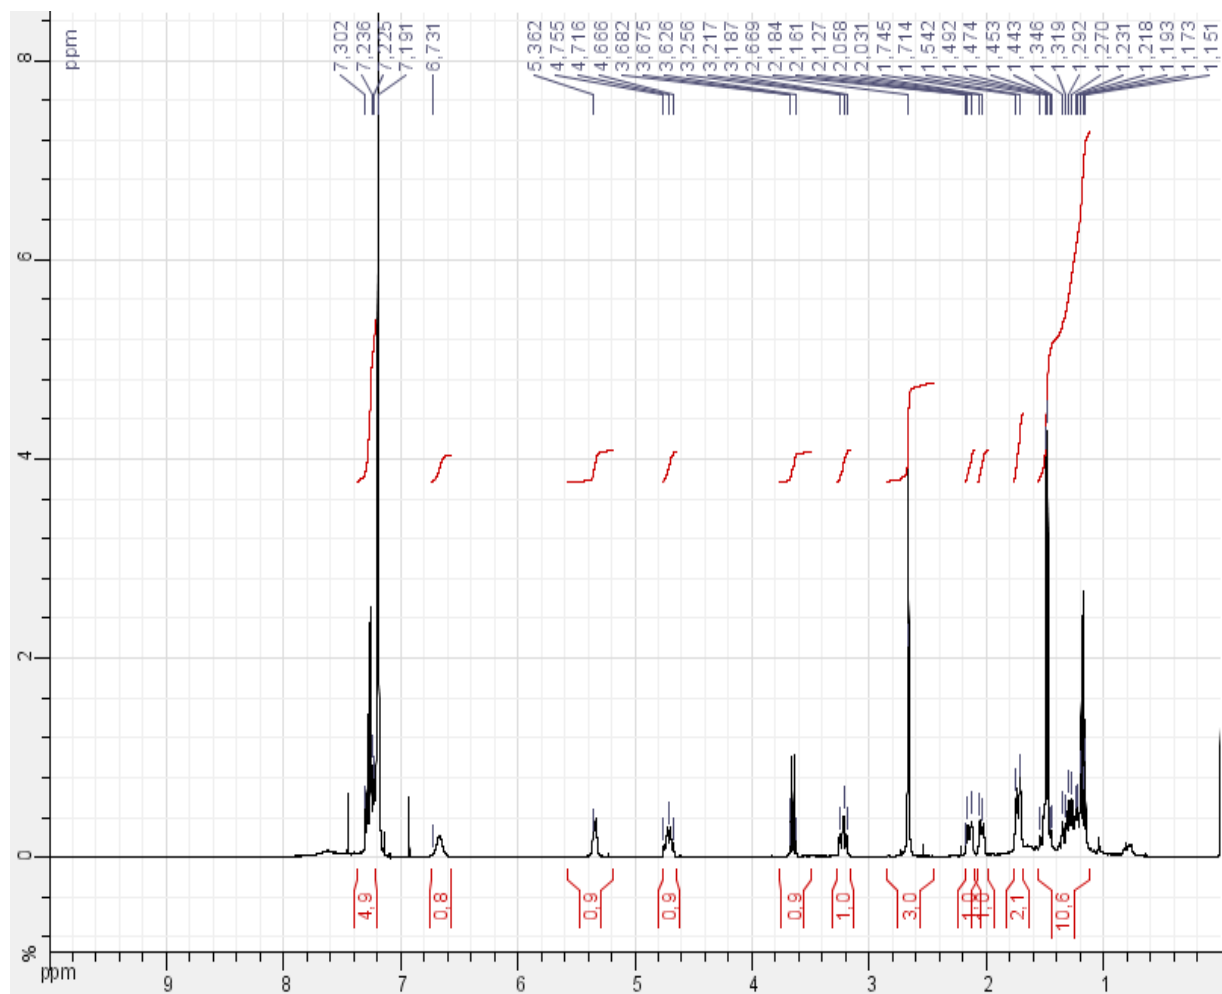

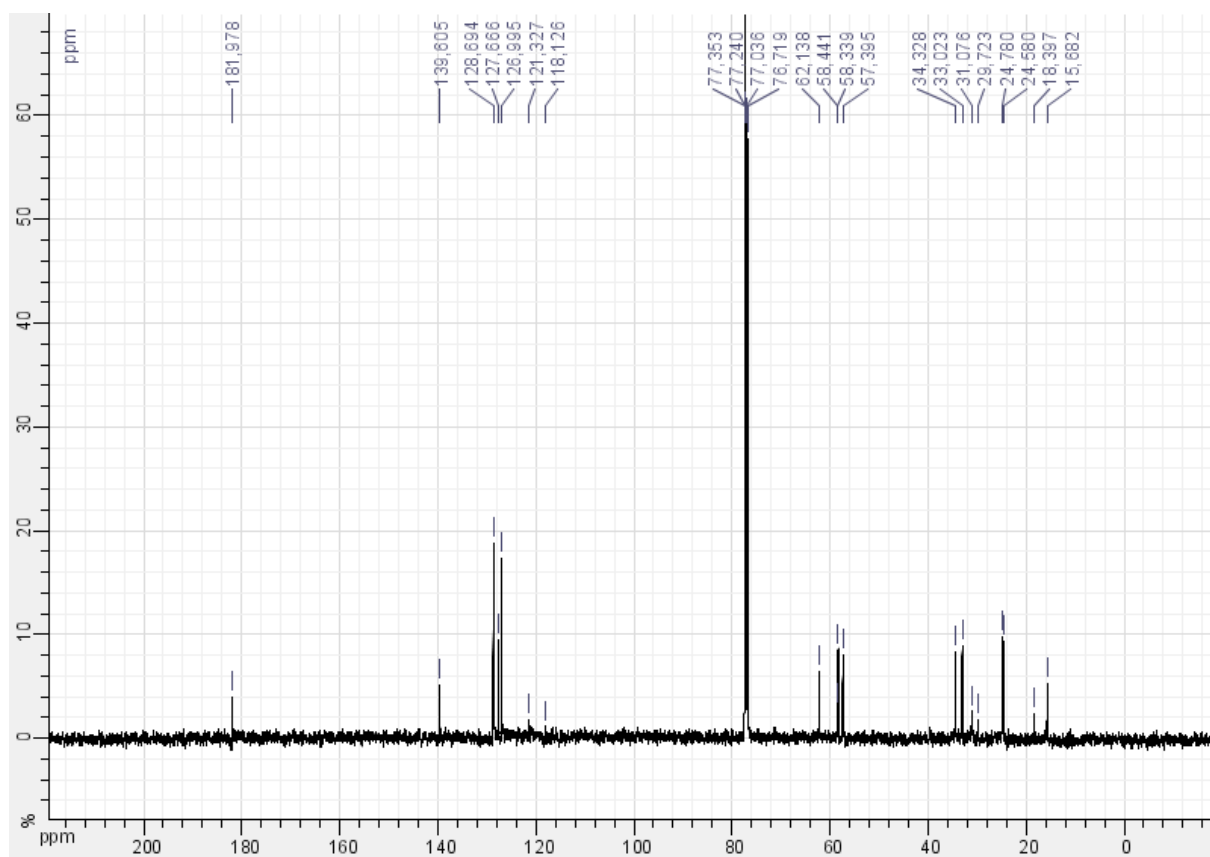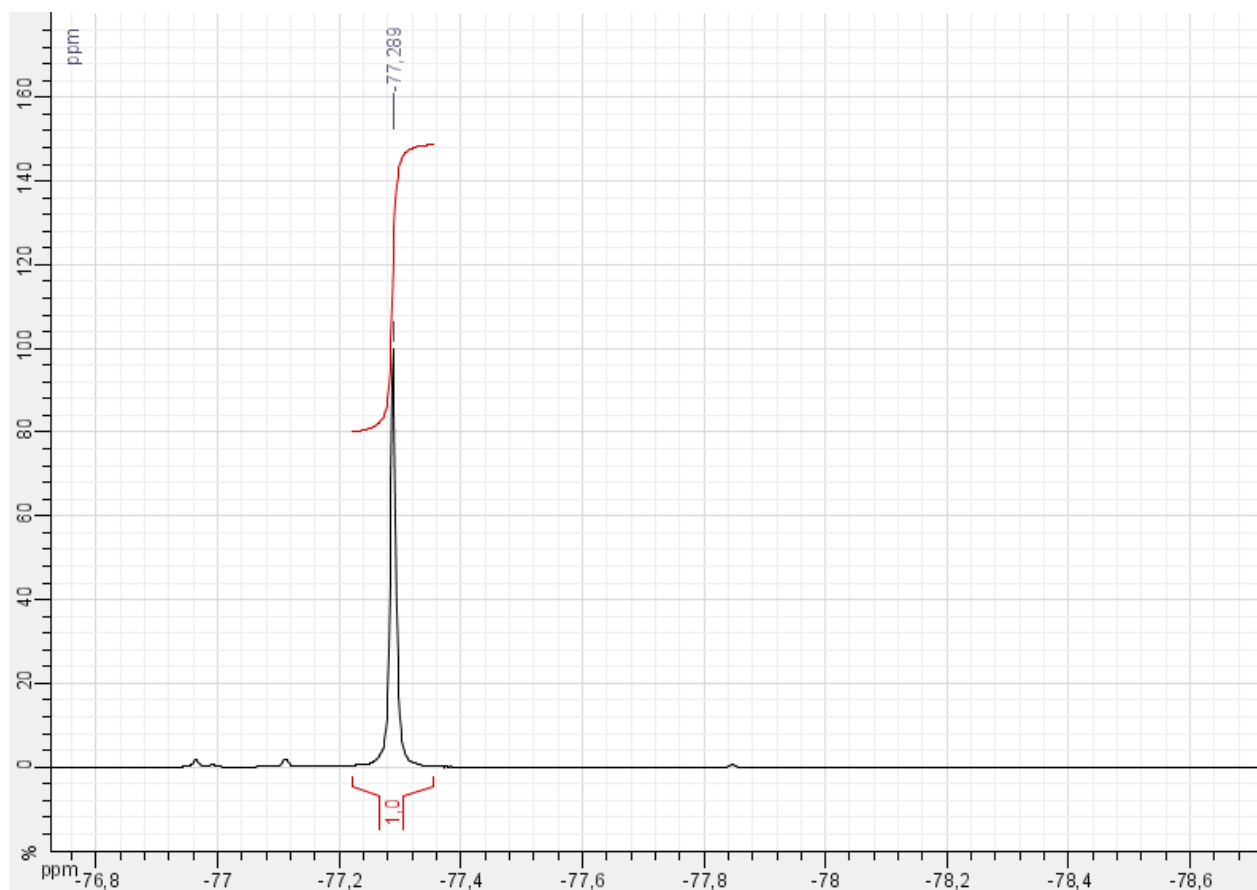

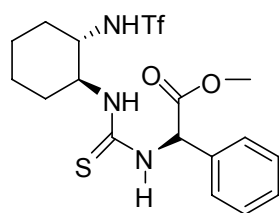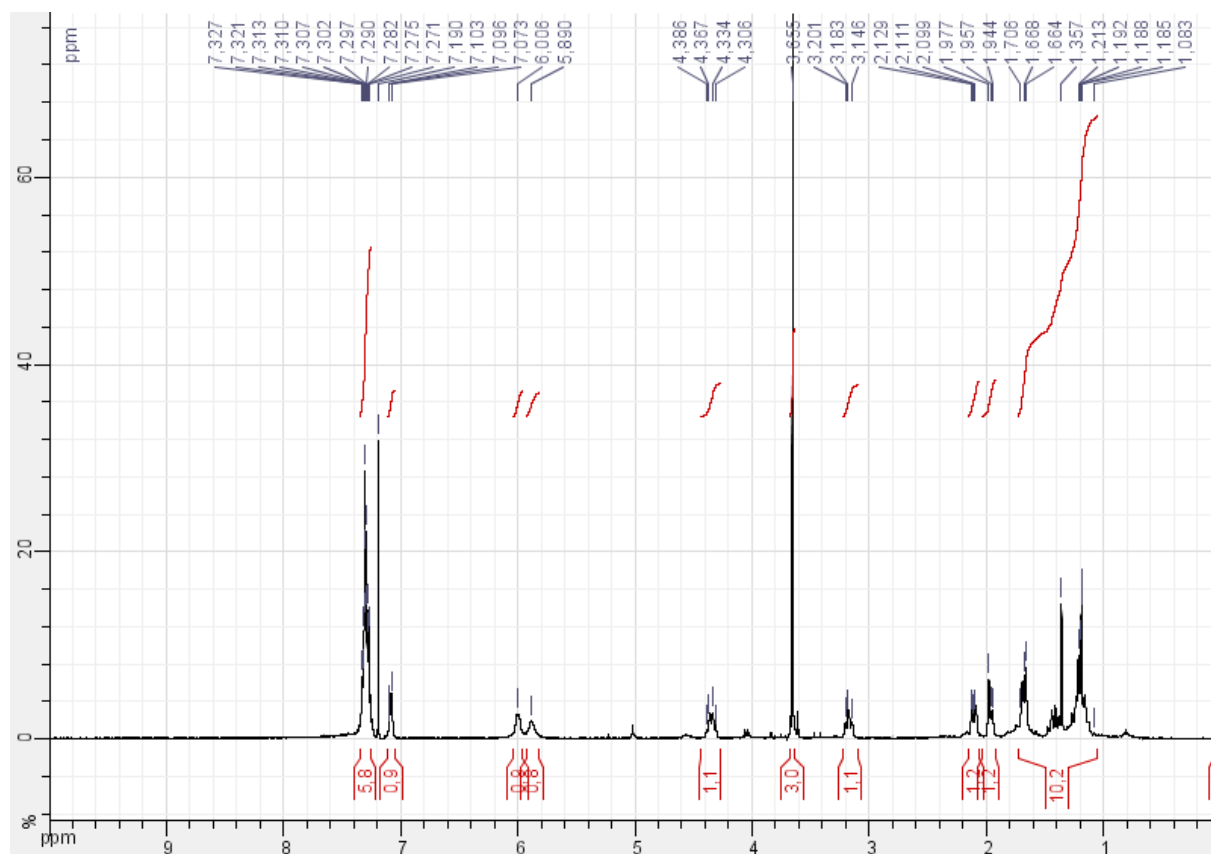

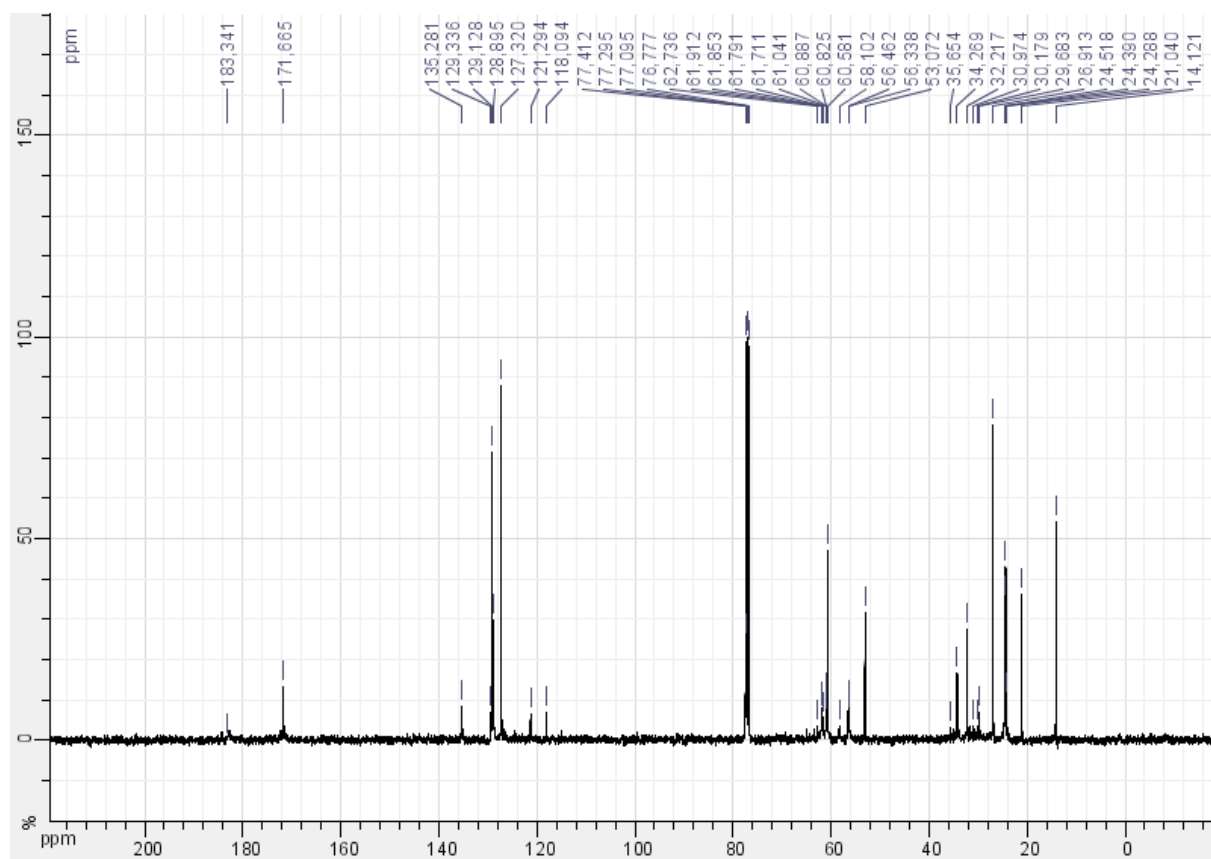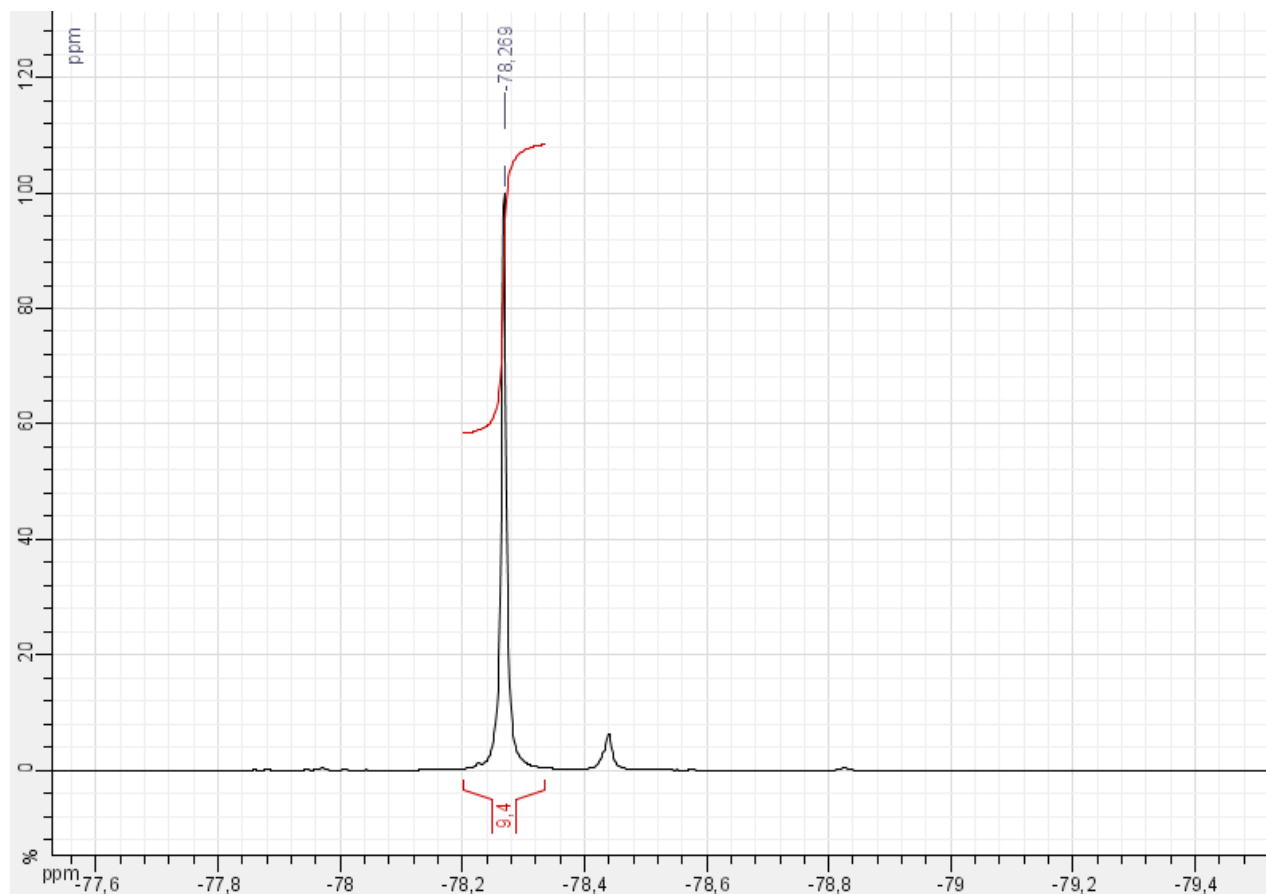

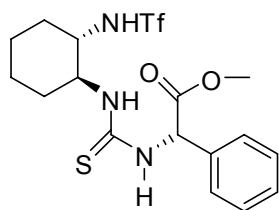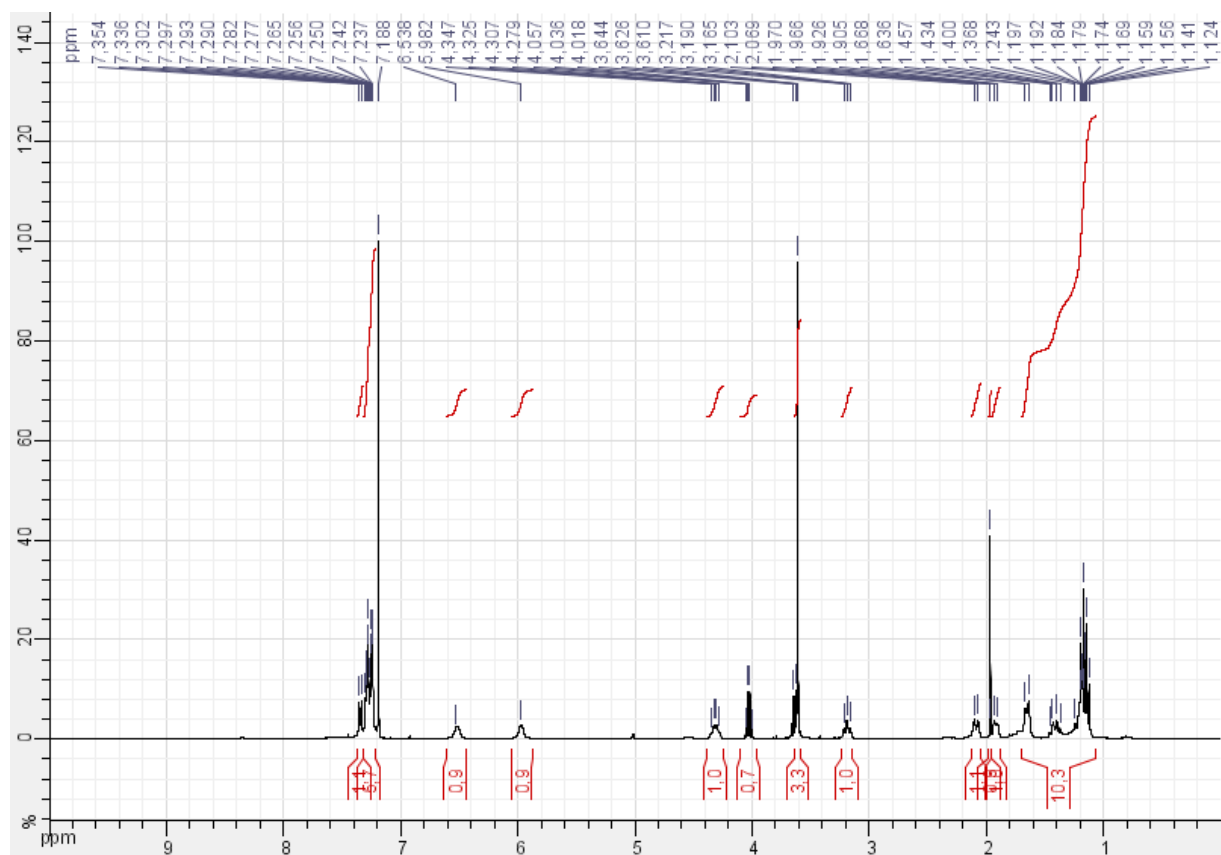

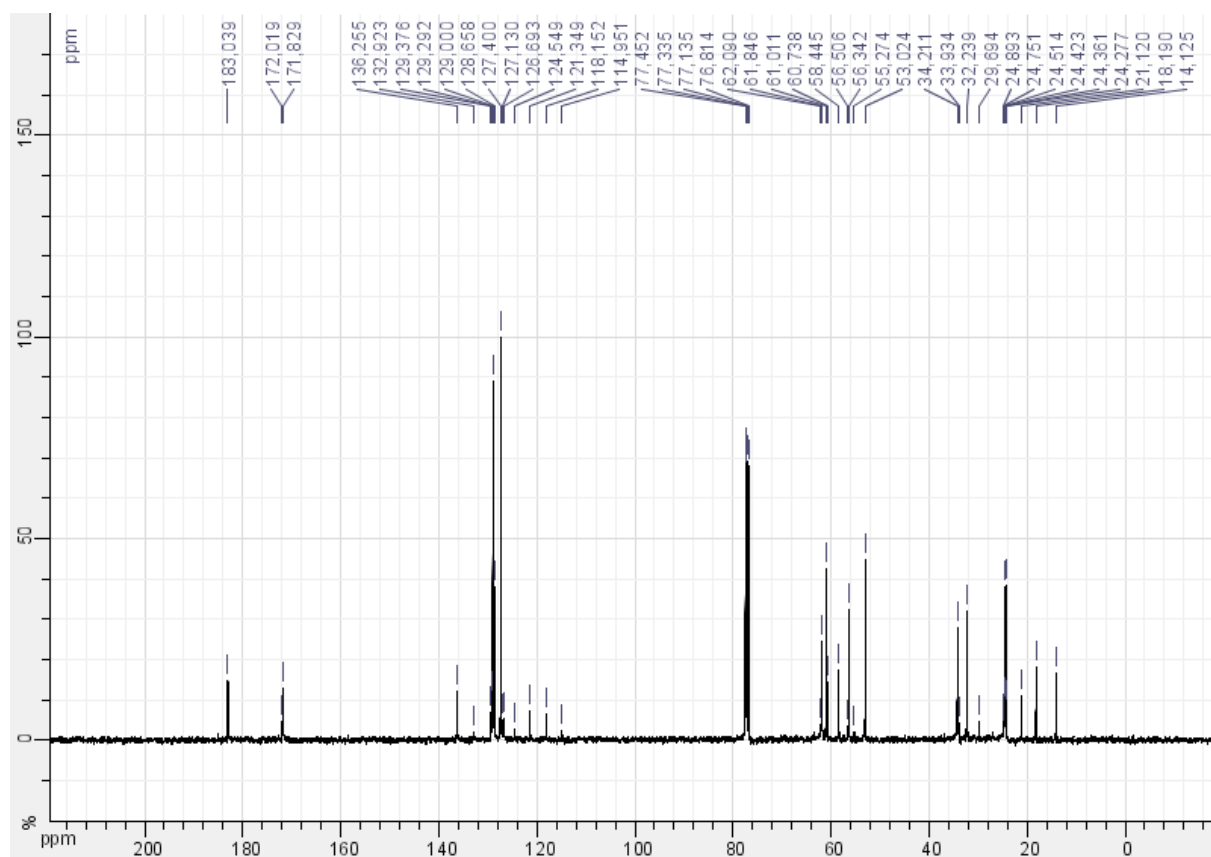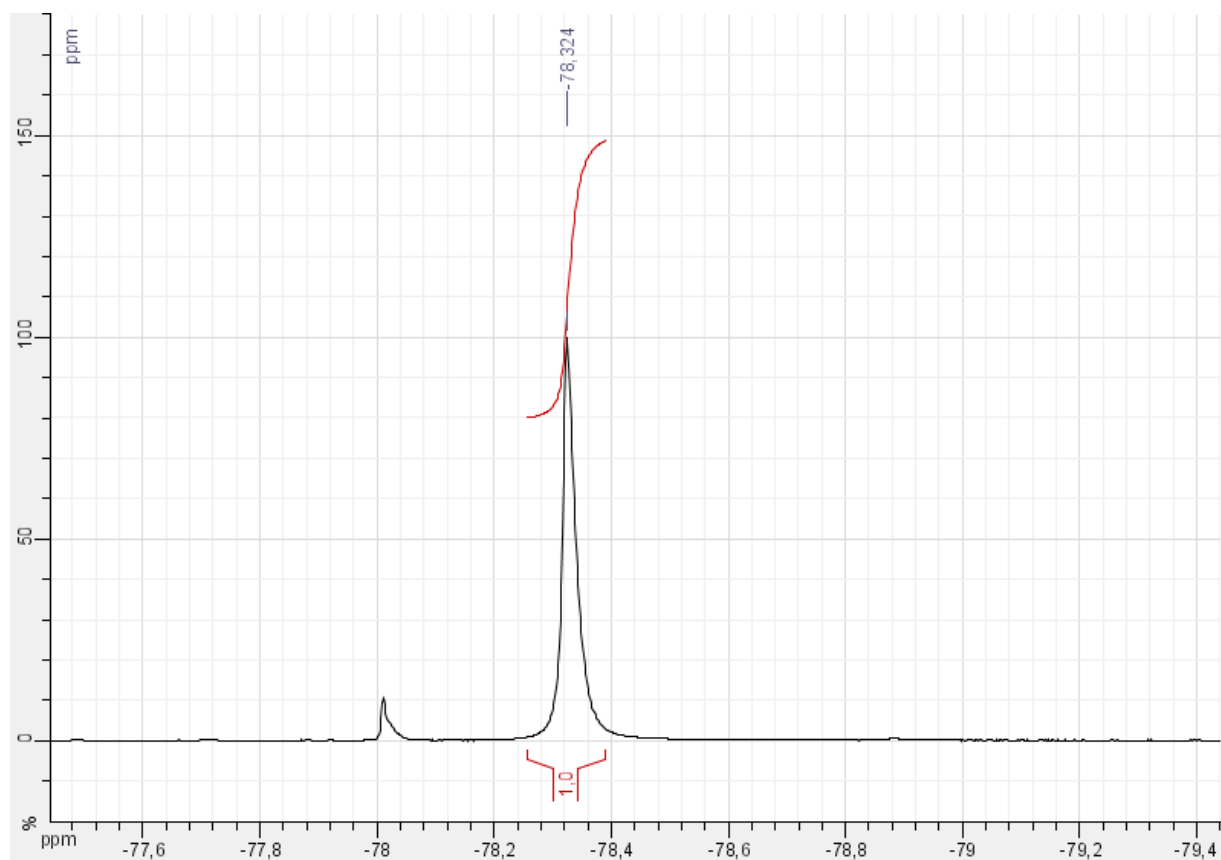



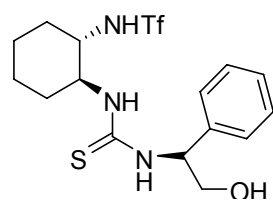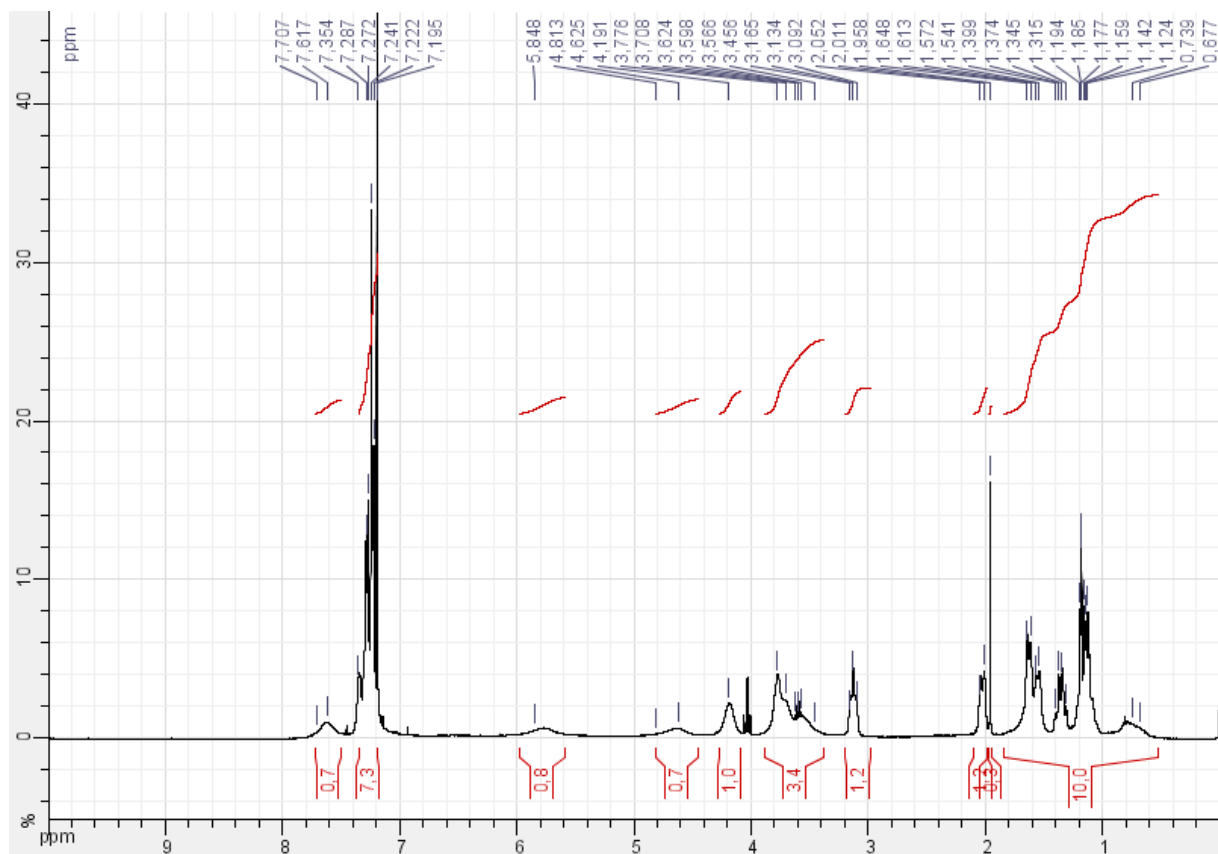

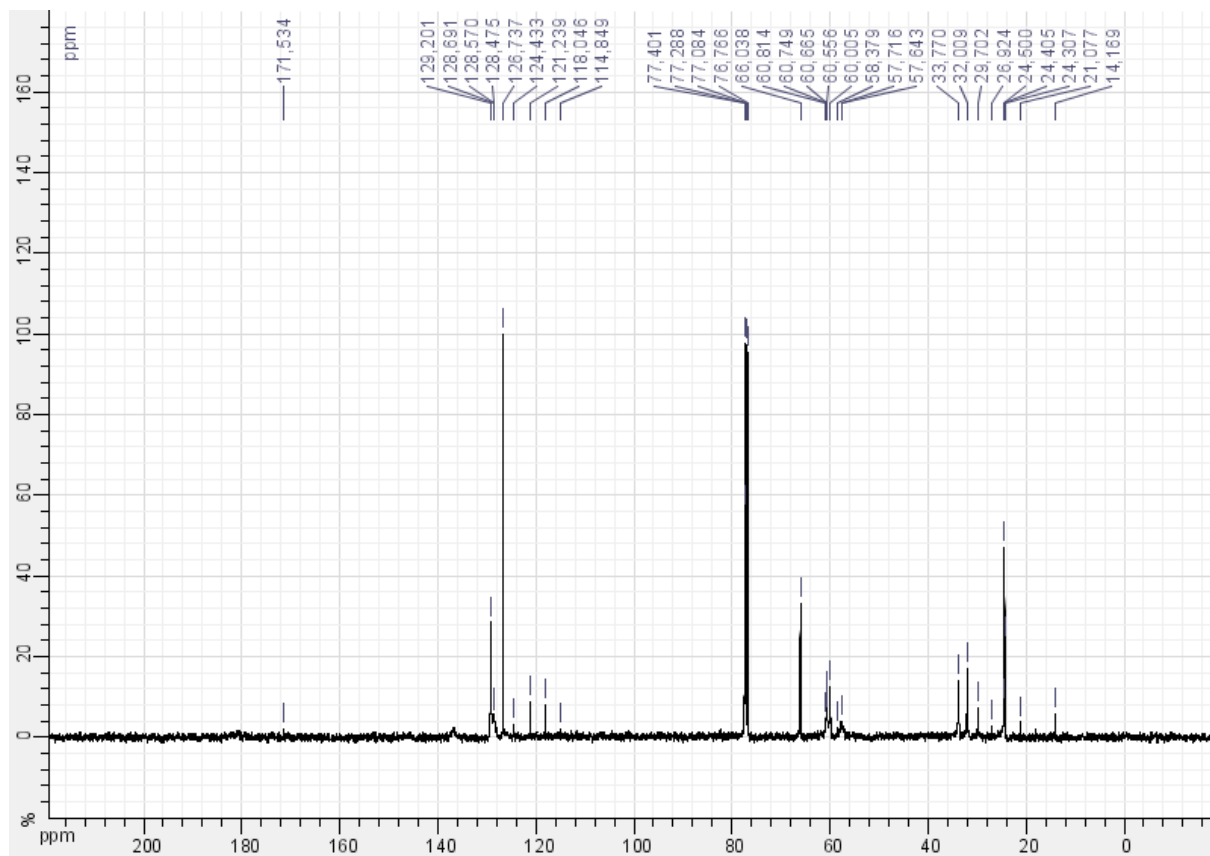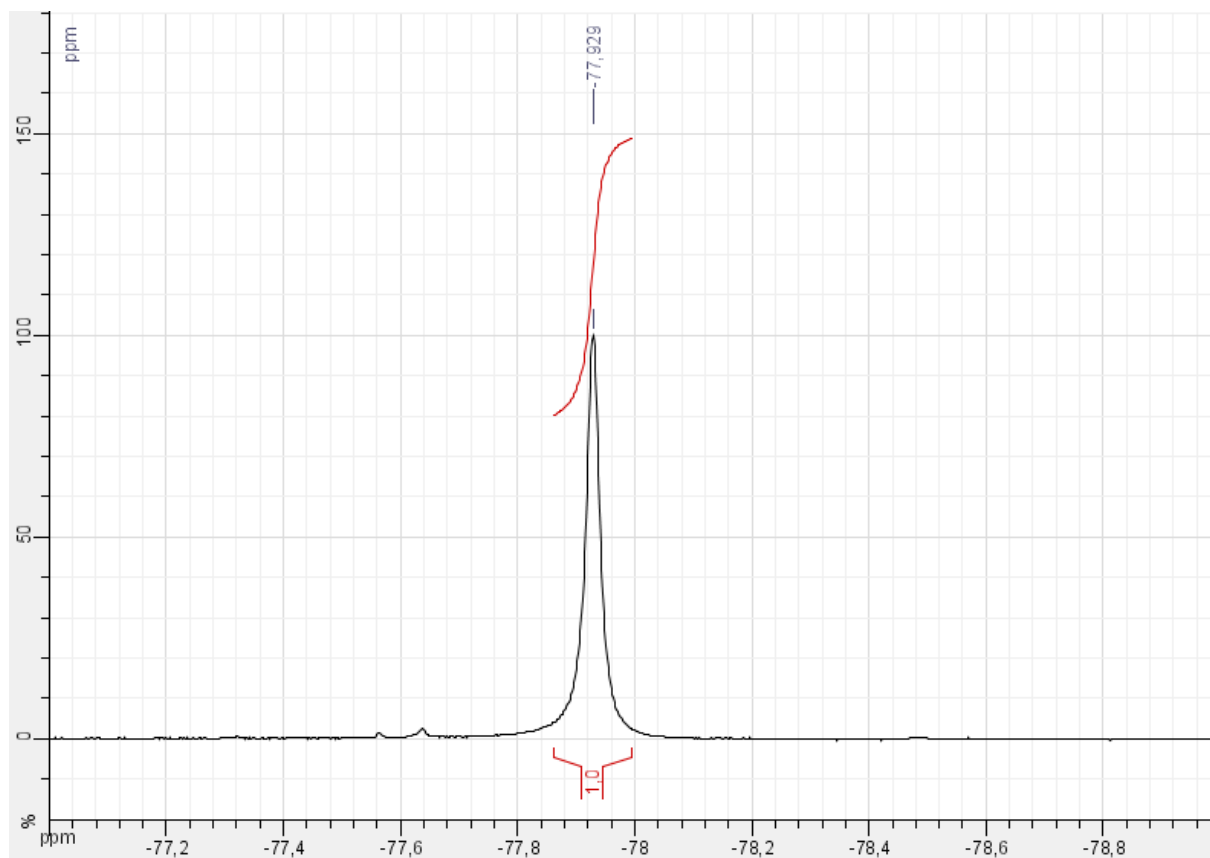

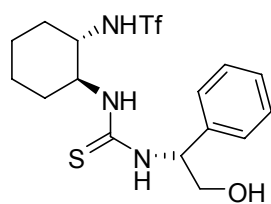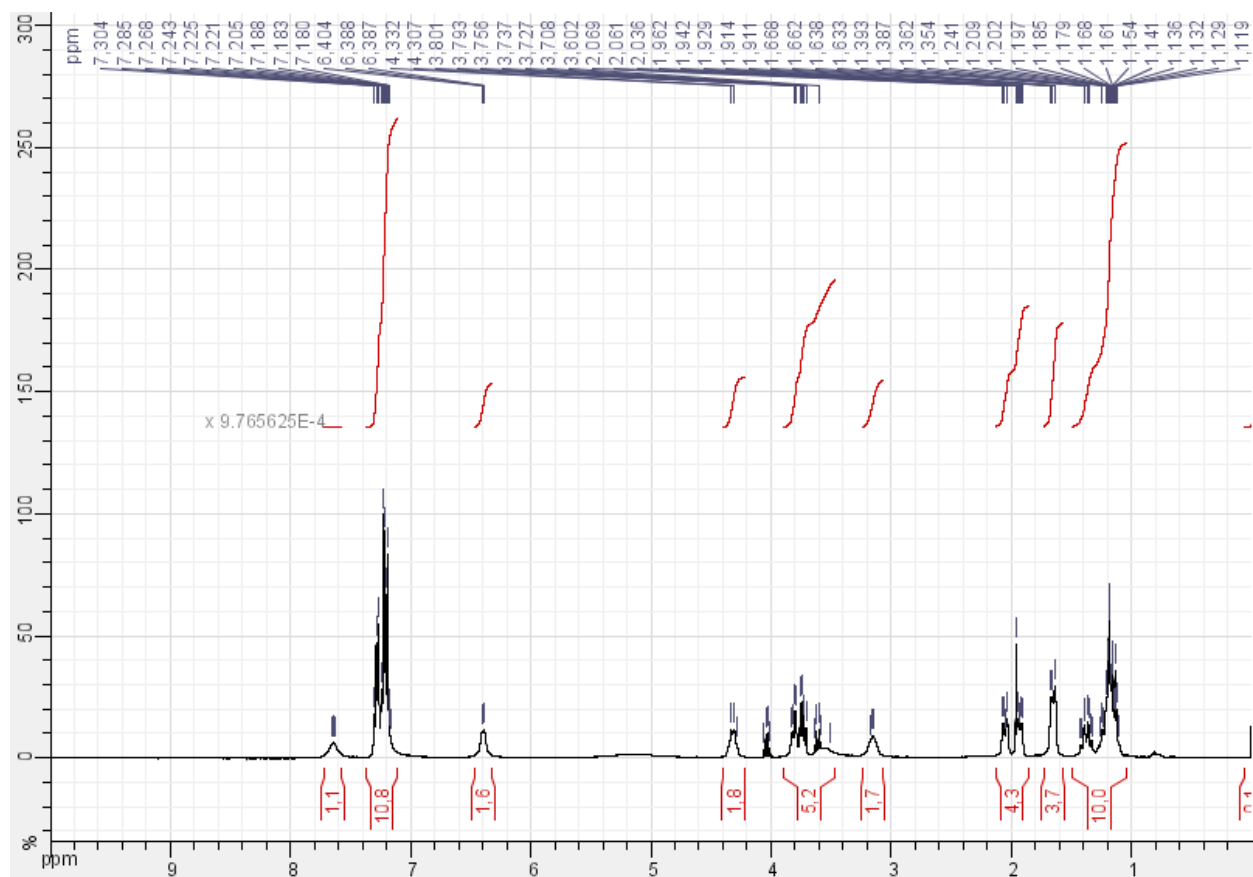

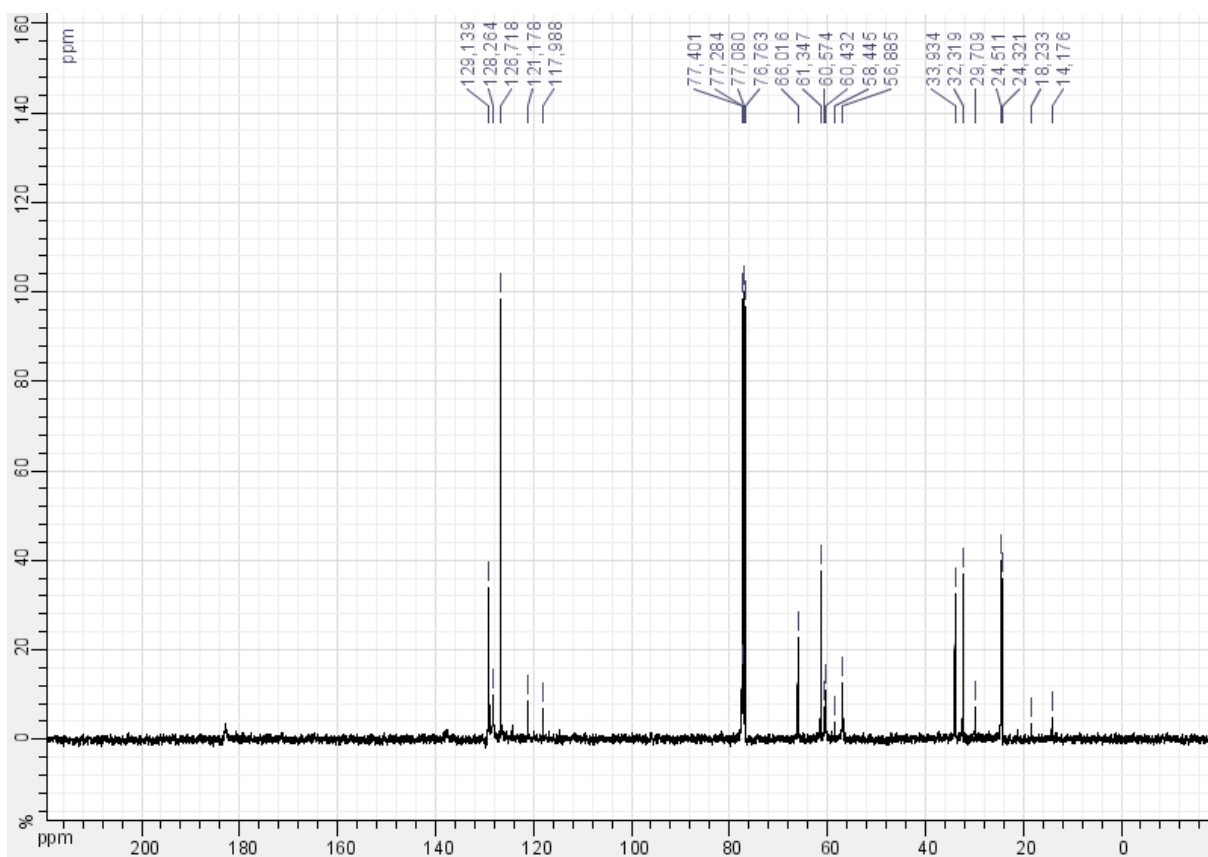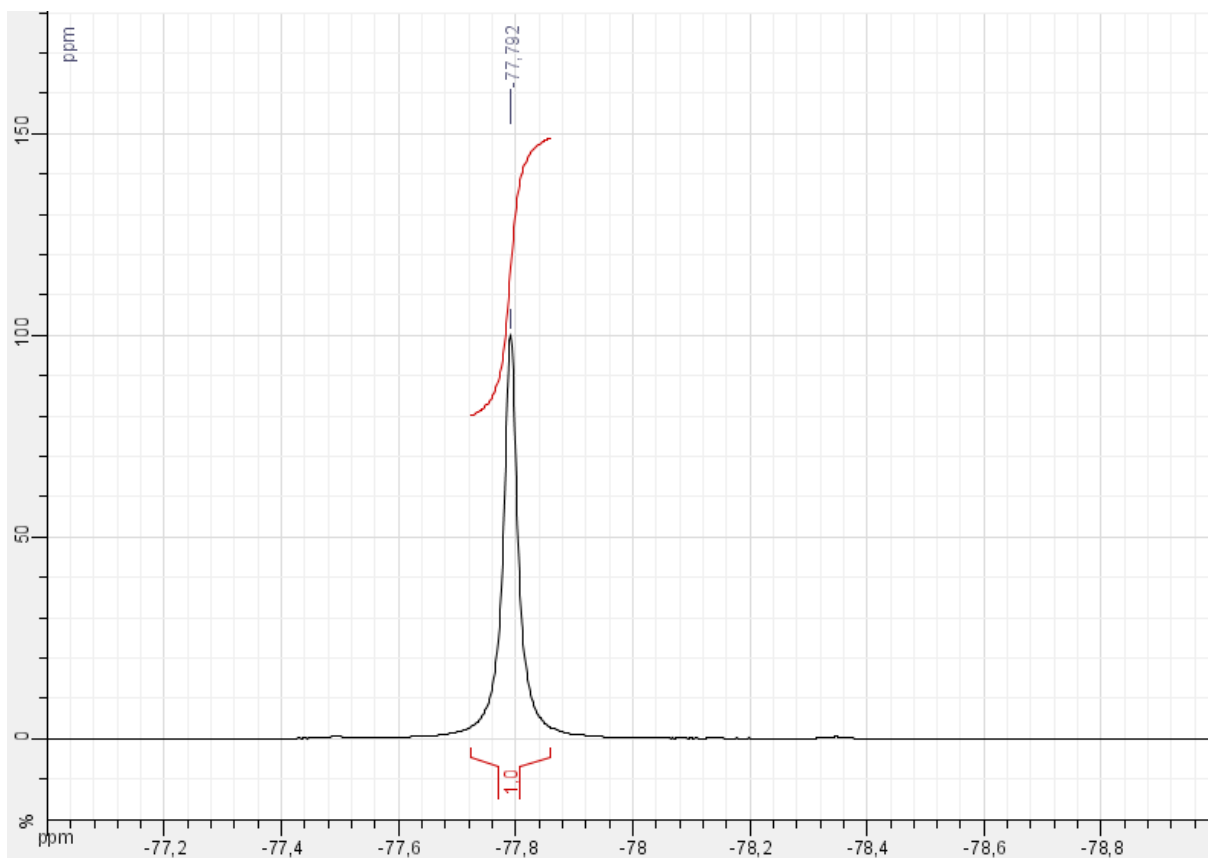

## VII. Plot of the initial S/R ratio of **3a** vs. the experimental ratio of thiourea diastereoisomers **4a**.

| Theoretical <sup>a</sup> S/R ratio of amine <b>3a</b> used for the thiourea <b>4a</b> formation | Experimental <sup>b</sup> (1S,2S,S)/(1S,2S,R) ratio of thiourea mixture <b>4a</b> |
|-------------------------------------------------------------------------------------------------|-----------------------------------------------------------------------------------|
| 0/100                                                                                           | 0/100                                                                             |
| 10/90                                                                                           | 10.00/90.00                                                                       |
| 20/80                                                                                           | 20.03/79.97                                                                       |
| 30/70                                                                                           | 29.98/70.02                                                                       |
| 40/60                                                                                           | 40.04/59.96                                                                       |
| 50/50                                                                                           | 49.97/50.03                                                                       |
| 60/60                                                                                           | 60.02/39.98                                                                       |
| 70/30                                                                                           | 69.98/30.02                                                                       |
| 80/20                                                                                           | 79.96/20.04                                                                       |
| 90/10                                                                                           | 89.94/10.06                                                                       |
| 100/0                                                                                           | 100/0                                                                             |

<sup>a</sup> mixtures prepared prior use, by mixing (1S, 2S) and (1R,2R) amine **3a**

<sup>b</sup> ratio determined by quantitative integration by <sup>19</sup>F NMR of the (-CF<sub>3</sub>) signals of both diastereoisomers **4a**

Plot of the initial S/R ratio of **3a** vs. experimental ratio of thiourea diastereoisomers **4a**.

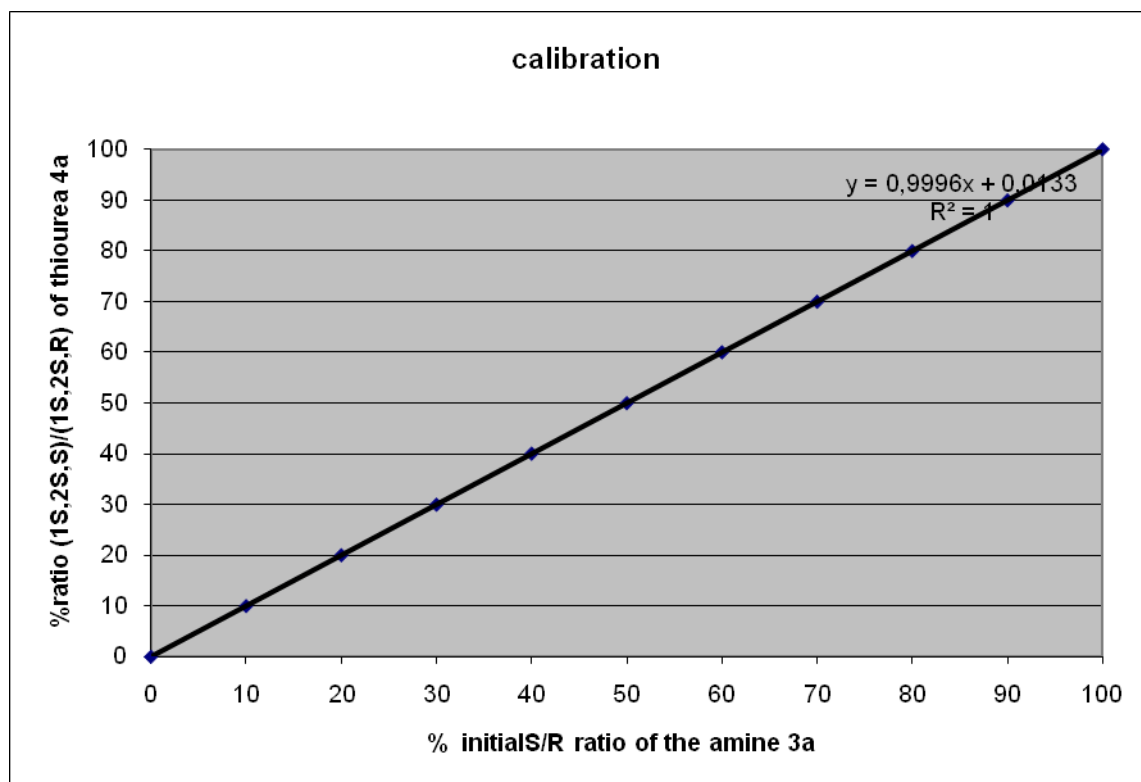

## VIII. Representative hOe effect for compound **4i**.

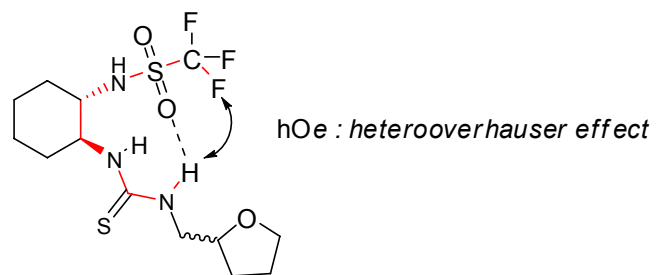

Supplement: b901568j.pdf [file b901568j.pdf]
